1 **Title:**

2 **Revealing interspecies transmission barriers of avian influenza A viruses**

3  
4 Mahmoud M. Naguib<sup>1</sup>, Per Eriksson<sup>1</sup>, Elinor Jax<sup>2,3</sup>, Jonas Nilsson<sup>4,5</sup>, Carina Sihlbom<sup>6</sup>,  
5 Cecilia Lindskog<sup>7</sup>, Caroline Bröjer<sup>8</sup>, Britt-Marie Olsson<sup>6</sup>, Michelle Wille<sup>1#</sup>, Jonas  
6 Waldenström<sup>9</sup>, Göran Larson<sup>4,5</sup>, Robert H. S. Kraus<sup>2,3</sup>, Åke Lundkvist<sup>1</sup>, Björn Olsen<sup>10</sup>,  
7 Josef D. Järhult<sup>10\*</sup>, Patrik Ellström<sup>10\*</sup>

8  
9 <sup>1</sup>Zoonosis Science Center, Department of Medical Biochemistry and Microbiology,  
10 Uppsala University, Uppsala SE-75237, Sweden

11 <sup>2</sup>Department of Migration, Max Planck Institute of Animal Behavior, Radolfzell 78315,  
12 Germany

13 <sup>3</sup>Department of Biology, University of Konstanz, Konstanz 78457, Germany

14 <sup>4</sup>Department of Laboratory Medicine, University of Gothenburg, SE-413 45, Gothenburg,  
15 Sweden

16 <sup>5</sup>Laboratory of Clinical Chemistry, Sahlgrenska University Hospital, SE-413 45,  
17 Gothenburg, Sweden

18 <sup>6</sup>Proteomics Core Facility, University of Gothenburg, Sahlgrenska Academy, SE-405 30,  
19 Gothenburg, Sweden

20 <sup>7</sup>Department of Immunology, Genetics and Pathology, Science for Life Laboratory,  
21 Uppsala University, SE-75185, Uppsala, Sweden

22 <sup>8</sup> Department of Pathology and Wildlife Diseases, National Veterinary Institute (SVA) , SE-  
23 75189 Uppsala, Sweden

24 <sup>9</sup>Centre for Ecology and Evolution in Microbial Model Systems, Linnaeus University, SE-  
25 391 82 Kalmar, Sweden

26 <sup>10</sup>Zoonosis Science Center, Department of Medical Sciences, Uppsala University,  
27 Uppsala SE-75185, Sweden

28 **#** Present address: Marie Bashir Institute for Infectious Diseases and Biosecurity, School  
29 of Life and Environmental Sciences and School of Medical Sciences, The University of  
30 Sydney, Sydney, Australia.

31

32 \* JJ and PEI contributed equally to this publication

33

34 Corresponding Author

35 Patrik Ellstrom: [patrik.ellstrom@medsci.uu.se](mailto:patrik.ellstrom@medsci.uu.se)

36

37 **Abstract**

38  
39 Influenza A virus (IAV) pandemics result from interspecies transmission events within the  
40 avian reservoir and further to mammals including humans. Investigating molecular virus–  
41 host interactions dictating this process and the adaptations to the new hosts that follow is  
42 vital to understand zoonotic IAV spread. Receptor incompatibility has been suggested to  
43 limit zoonotic IAV transmission from the wild bird reservoir. Other barriers to interspecies  
44 transmission, particularly within the avian system, largely remain elusive. Through  
45 assessment of infection dynamics of mallard origin IAV in two different avian hosts,  
46 coupled with studies of receptor expression and host response we aimed to reveal the  
47 host-pathogen interactions in a cross-species transmission event. We found that shedding  
48 patterns and innate immune responses were highly dependent on viral genotypes, host  
49 species and inoculation routes, but less dependent on receptor expression. Further, in  
50 contrary to the prevailing dogma we demonstrate that birds can produce a wide range of  
51 different sialylated structures also found in mammals, e.g. extended *N*- and *O*-linked  
52 Neu5Ac $\alpha$ 2,6 terminated glycans. Overall, receptor incompatibility is not the sole  
53 transmission barrier for IAV between birds and to humans, but other host-pathogen factors  
54 deserve dedicated studies to achieve proper pandemic preparedness.

55  
56  
57  
58  
59

60 Zoonotic viruses have the capacity to cause severe pandemics <sup>1</sup>. The three latest influenza  
61 A virus (IAV) pandemics (H2N2 1957, H3N2 1968, and H1N1 2009) <sup>2-4</sup> have contained  
62 genetic material originating from avian influenza viruses. These events have most likely  
63 involved spread from wild to domestic bird species and to pigs. Key barriers for  
64 interspecies transmission are molecular interactions between host and virus, including  
65 recognition of host receptors by virus surface proteins, adaptation to changes in pH and  
66 temperature, as well as avoiding the host's innate and adaptive immune response to  
67 infection <sup>5,6</sup>.

68  
69 One of the biological traits required for interspecies transmissions of IAV is a change in  
70 receptor binding specificity. Avian viruses preferentially bind to  $\alpha$ 2,3-linked sialic acid  
71 (SA)-containing receptors, whereas human IAVs prefer  $\alpha$ 2,6-linked SA-containing  
72 receptors <sup>7-11</sup>. Originally it was believed that  $\alpha$ 2,3-linked SA was exclusive to bird tissues,  
73 whereas  $\alpha$ 2,6-linked SA was exclusive to humans <sup>12-14</sup>. Furthermore, species specific  
74 differences in the sialylated glycan structures serving as receptors for IAVs have been  
75 proposed as barriers for transmission between bird species <sup>12,13,15</sup>. More recent  
76 characterization of the human airway epithelium has revealed that  $\alpha$ 2,3-linked SA can  
77 indeed be found <sup>16,17</sup>, and primary screenings with lectins have indicated the presence of  
78  $\alpha$ 2,6-linked SA in avian tissues as well <sup>18-23</sup>. The most important target organs for IAV  
79 replication are poorly defined in most bird species. For mallards (*Anas platyrhynchos*), the  
80 central reservoir for IAVs, viruses replicate in the surface epithelium of the intestinal tract  
81 and transmission occurs via the fecal–oral route<sup>24</sup>. In contrast, the respiratory tract is  
82 known to be important for replication in chickens and indirect evidence suggest that this  
83 is the case also in an array of wild bird species, including tufted ducks (*Aythya fuligula*)  
84 <sup>23,25-27</sup>, particularly in the case of infection with highly pathogenic avian influenza virus  
85 (HPAIV).

86  
87 Considering the barriers that dictate cross species transmission events, we hypothesized  
88 that the repertoire of expressed sialylated glycan receptors for IAV differs between birds  
89 and mammals, and that differences in the glycan structure were to be found even between  
90 distantly related bird species. Furthermore, we hypothesized that the outcome of  
91 experimental transmission of low pathogenic avian influenza viruses (LPAIVs) between

92 bird species would differ depending on infection route and site of infection, receptor  
93 repertoire, host response and virus subtype. Moreover, successful introduction of an  
94 LPAIV into a new host species would likely be accompanied by adaptive viral genetic  
95 changes. To test these hypotheses, we undertook two main approaches. First, we  
96 comprehensively assessed infection potential and host response to infection of a broad  
97 array of mallard-origin LPAIVs in two different avian hosts: chicken - a key link to zoonotic  
98 transmission, and tufted duck - a representative of the wild reservoir. To evaluate the  
99 outcomes of these experiments we assessed virus shedding and monitored the host  
100 response as well as SNPs in viruses after infection. Second, we characterized and  
101 compared the IAV glycan receptor repertoire displayed on cell surfaces of presumed  
102 target organs of mallards, chickens and tufted ducks using glycoproteomics.

103

## 104 **Results**

105

106 *The outcomes of experimental AIV infection differ between virus subtypes, host species*  
107 *and routes of infection.*

108 To interrogate how outcomes of AIV infection can differ depending on host species and  
109 route of infection, chickens and tufted ducks were infected with eight different subtypes of  
110 mallard-origin LPAIVs (Table S1) using two different routes of virus inoculation:  
111 ocular or intraesophageal. All birds tested negative for AIV antibodies prior to the  
112 infection experiments. All chickens and tufted ducks inoculated intraesophageally were  
113 negative in both oropharyngeal and cloacal swab samples by RT-qPCR for all viruses with  
114 only two exceptions: one out of four tufted ducks inoculated with H8N4 showed positive  
115 AIV RNA (2.54 10-log EID<sub>50</sub> equivalent) at 1 day post infection (d.p.i.) and one out of four  
116 tufted ducks inoculated with H11N9 (0.79 10-log EID<sub>50</sub> equivalent) at 2 d.p.i. (data not  
117 shown).

118 In contrast, ocular inoculation yielded positive oropharyngeal samples for all viruses  
119 in both host species at 1 d.p.i (Figure 1a). In ocularly inoculated chickens, virus  
120 shedding was detected on all days in all four chickens inoculated with H3N8, H4N6, and  
121 H6N2 viruses. In chickens inoculated with H10N1 and H15N5, shedding remained until 3  
122 d.p.i. in a subset of birds whereas the H8N4 virus was detected only at 1 d.p.i. Surprisingly,

123 only one out of four chickens inoculated with the H9N2 virus showed positive AIV RNA  
124 (0.58 10-log EID<sub>50</sub> equivalents), and this was limited to the oropharyngeal sample at 1  
125 d.p.i. Given the high burden of H9N2 in poultry, this is surprising. However,  
126 phylogenetically the virus used in this study is located in a distant clade comprising wild  
127 bird sequences from Europe, rather than clades dominated by H9N2 viruses in Asian  
128 poultry (Figure S1). In chickens, the H6N2 virus showed the most widespread viral  
129 replication and AIV RNA was detected in colon in three birds, lungs in two birds, and  
130 spleen in a single bird at 3 d.p.i. with virus titre up to 7.27 10-log EID<sub>50</sub> equivalents. For  
131 the other subtypes, viral replication in internal organs were detected to varying extent  
132 (Figure S2). In the oculonasally inoculated tufted ducks, all birds shed AIV RNA in  
133 oropharyngeal swabs at 1 d.p.i. in all groups except in the H10N1 and H11N9 virus  
134 groups, where only two and three birds respectively were positive (Figure 1b). The H6N2  
135 and H9N2 groups showed virus RNA in the oropharyngeal swabs from all tufted ducks  
136 until 3 d.p.i. Virus RNA was detected at 3 d.p.i. in the lung (two birds), colon (three birds)  
137 and spleen (one bird) of the H6N2 inoculated group (Figure S2). All negative control  
138 groups in all experiments demonstrated no signs of disease and no virus was detected in  
139 any of the collected swab samples.

140 Taken together, viral shedding differed depending on AIV subtype, host species and route  
141 of inoculation. The intraoesophaegal route produced no virus infections, neither in tufted  
142 ducks nor in chickens. This is in contrast to reported results from mallards, where  
143 intraoesophaegal inoculation have resulted in cloacal shedding regardless of subtype [24,28-](#)  
144 [30](#), and suggests that site of replication might differ between bird species even within the  
145 Anatidae family.

146  
147 *A diversity of single nucleotide polymorphisms in progeny viruses following experimental*  
148 *infection.*

149 Putative viral genetic changes during virus infection of chickens and tufted ducks were  
150 investigated in swab and tissue samples with virus EID<sub>50</sub> equivalents high enough to allow  
151 for deep sequencing (Table S2). No deletions or insertions were recorded in any of the  
152 samples. Previously described amino acid variations associated with host specificity were  
153 detected in the NP protein (N319K) of tufted duck/H6 spleen and in the HA protein

154 (N183H) of the tufted duck/H6 cloacal sample at 3 d.p.i. [31-33](#). In addition, a V27L aa  
155 substitutional change, previously described in association with amantadine resistance [34](#),  
156 was observed in the virus retrieved from tufted duck/H6 colon. Furthermore, SNPs of  
157 unknown significance were recovered in the AIV obtained from oropharyngeal swabs from  
158 the H3N8 inoculated chicken group as well as the virus recovered from tufted duck/H8  
159 oropharyngeal swab at 3 d.p.i. (Table S2). Finally, the viruses recovered from H9N2 and  
160 H10N1 inoculated groups (Table S2) showed no SNPs in their genomes relative to the  
161 inoculum.

162  
163 *Transcriptomics demonstrates differential expression of genes involved in innate immunity*  
164 *and glycosylation in chickens and tufted ducks*

165  
166 In order to understand the host response of chickens and tufted ducks to challenge with  
167 mallard-origin LPAIVs, we utilized RNASeq to disentangle gene expression patterns of  
168 the hosts. We selected 216 tissue samples comprising lung and colon, as they are  
169 important sites of infection, and spleen as it is a primary lymphoid organ. Out of the 216  
170 samples sequenced, 207 were of high quality with an average of  $3311801 \pm 740763$   
171 (mean  $\pm$  SD) reads per sample. The remaining nine samples were excluded due to low  
172 sequencing depth and/or quality.

173 First, we identified significant differentially expressed genes (DEGs) in each tissue (colon,  
174 lung, and spleen) for chickens and tufted ducks for each AIV subtype. In chickens, the  
175 number of DEGs ranged from 11–2949 in colon, 34–3225 in lung and 6–3046 in spleen,  
176 and in tufted ducks from 49–597 in colon, 7-416 in lung and 92-560 in spleen of birds  
177 treated with the different AIV subtypes, see (Figure S3a–b and S4a–b). A marked  
178 difference in response to virus challenge in chickens between H3N8 or H4N6 and the  
179 other subtypes tested was observed. Fewer DEGs were identified in the tufted duck  
180 organs (mean 248 DEGs/organ/virus  $SD \pm 167$ ), and in contrast to what was observed in  
181 chickens, H3N8 was the subtype eliciting the highest number of DEGs. The overlap of  
182 DEGs was evaluated between groups infected with the different AIV subtypes within the  
183 same species, as well as groups infected with the same subtype between the two species.  
184 The proportion of DEGs in response to infection that was unique to each AIV subtype was

185 calculated. In chickens it ranged from 3-32% in colon, 4–24% in lung and 0–31% in spleen  
186 across different subtypes (Figure S5a–c). Chickens inoculated with H3N8 had the highest  
187 percentage of unique DEGs (32% in colon, 23% in lung, 31% in spleen). The number of  
188 unique DEGs detected in a single treatment group in tufted ducks ranged from 6-51% in  
189 colon, 0-32% in lung and 10–84% in spleen (Figure S5d–f). As in chickens, H3N8 infected  
190 birds displayed the highest percentage of unique DEGs (51% in colon, 31% in lung, 42%  
191 in spleen). For all viruses except H3N8 and H4N6, the number of DEGs in response to  
192 infection was lower in tufted ducks than in chickens. The overlap of orthologous DEGs  
193 between the two species was low to moderate, with H3N8 and H4N6 having a smaller  
194 overlap of DEGs between the two species than the remaining virus subtypes (Figure S6-  
195 8).

196 To assess the innate immune response to the LPAIVs used in this study, we specifically  
197 studied genes known to be involved in interferone and proinflammatory pathways as well  
198 as  $\beta$ -defensins in chickens and ducks at 3 d.p.i [35](#) [36](#). The full list of genes included in this  
199 analysis is found in Table S3. In general, up- or down-regulation of such genes was weak  
200 or absent in both chickens and tufted ducks. In chickens, a few genes related to interferon  
201 signaling were generally affected in response to infection; in colon, *TLR 3* was weakly  
202 upregulated for all subtypes except H3N8 and H4N6 (Figure 2, Table S4). However, the  
203 adaptor molecule *TICAM1/TRIF* downstream of TLR 3 was generally down-regulated or  
204 unaffected in the corresponding colon samples as well as in samples from lung and  
205 spleen. The ubiquitine ligase gene, *TRIM25* was weakly up-regulated in response to most  
206 IAV subtypes in colon, spleen and lung of chickens. Among the  $\beta$ -defensin genes  
207 analyzed, significant changes in response to AIV infection was mainly detected in spleen  
208 (and to some extent in lungs) of chickens, where *AvBD1*, *4* and *6* as well as *DEFB4A* were  
209 all downregulated at 3 d.p.i. In infected chickens, the H6N2 subtype stood out in evoking  
210 the most consistent responses in genes related to IFN signaling (Figure 2, Table S3).  
211 From analysis of the tufted duck genome and transcriptome, we could verify for the first  
212 time that the RNA sensing protein RIG-I is encoded in this species. However, we could  
213 hardly see any transcriptomic response to infection in genes related to IFN signaling or  
214 other aspects of innate immunity (data not shown).

215

216 Other genes of note, are the *ANP32* family, serving as co-factors for the virus polymerase  
217 during transcription. In chickens, *ANP32E* was weakly down-regulated in all tissues in  
218 response to infection with all subtypes except H3N8 and H4N6 (Figure 3a, Table S4). The  
219 zinc finger protein *ZC3H11A* has been suggested to affect replication efficiency of several  
220 nuclear replicating RNA viruses including IAV<sup>37</sup>. In our experiments in chickens, *ZC3H11B*  
221 was weakly up-regulated for several of the IAV subtypes in all tissues, whereas in tufted  
222 ducks *ZC3H11A* was slightly down-regulated in colon for some subtypes (Figure 3a–b,  
223 Table S4, S5). Glycosyltransferases related to AIV receptor synthesis were differentially  
224 expressed in chickens at 3 d.p.i. Of note was that sialyl transferases adding  $\alpha$ 2,3-linked  
225 SA were generally weakly upregulated in response to infection with most viruses  
226 (*ST3GAL2* in spleen, *ST3GAL4* in lung, *ST3GAL5* in spleen) whereas *ST6GAL1* encoding  
227 a sialyl transferase adding  $\alpha$ 2,6-linked SA was weakly down-regulated in all tissues for  
228 most viruses. Exceptions to this rule were *ST3GAL6* that was down-regulated in lungs  
229 and *ST6GAL2* that was largely unaffected but upregulated in lungs from birds infected  
230 with H9N2 and H11N9. A similar pattern could not be observed in tufted ducks (Figure 3b,  
231 Table S5). The fucosyl transferase gene *FUT8* was generally up-regulated in all chicken  
232 tissues for most viruses whereas *FUT11* was down-regulated, predominantly in the  
233 chicken spleen. In tufted ducks, these genes were unaffected except for upregulation of  
234 *FUT8* in spleen in response to H4N6 and H8N4.

235  
236 *Glycoproteomics reveals similarities in influenza virus receptor repertoires between bird*  
237 *species.*

238 To study how the repertoires of sialylated glycan receptors for IAV differ across avian  
239 species, we performed glycoproteomic analysis on uninfected specimens of mallards (the  
240 original host of the IAV isolates used in this study) as well as of the experimental animals;  
241 chickens and tufted ducks. Tissue samples were collected from putative AIV target organs  
242 comprising trachea, lung, ileum, and colon from healthy individuals of tufted duck, mallard  
243 and chicken. In mallards, *N*-glycopeptides terminating with  $\alpha$ 2,3-linked Neu5Ac were  
244 found in membrane proteins from all sampled tissues (Figure 4 and Table S6).  
245 Additionally, *N*-glycopeptides terminating with  $\alpha$ 2,6-linked Neu5Ac were found in secreted  
246 serum proteins from all tissues (Figure 5). However, some *N*-glycopeptides terminating  
247 with  $\alpha$ 2,6-linked Neu5Ac were also detected in predicted membrane proteins. Similar



248 numbers of hits of structures terminated with Neu5Ac $\alpha$ 2,3 and Neu5Ac $\alpha$ 2,6 were found in  
249 the investigated mallard tissues, except for ileum that had a dominance of Neu5Ac $\alpha$ 2,3  
250 terminated structures. Disialylated glycoforms carrying one Neu5Ac $\alpha$ 2,3 and one  
251 Neu5Ac $\alpha$ 2,6 were detected in a smaller fraction of the samples, except for colon that  
252 lacked these  $\alpha$ 2,3/ $\alpha$ 2,6 mixed sialylated *N*-glycans. The *O*-glycopeptides had core 1  
253 structures (Gal $\beta$ 1,3GalNAc $\alpha$ 1–*O*–Ser/Thr) with Neu5Ac $\alpha$ 2,6 on the GalNAc for serum  
254 glycoproteins and Neu5Ac $\alpha$ 2,3 on the Gal, or both on the Gal and on the GalNAc, for  
255 membrane glycoproteins (Figure 4C and 4D). Importantly, longer sialylated *N*-glycans and  
256 fucosylated sialylated (S-Le) structures were detected in all sampled tissues from  
257 mallards, but concentrated towards ileum (Table S6). In general, there was a dominance  
258 of sialylated *N*-glycans compared to *O*-glycans in most tissues except the lungs that  
259 contained equal amounts of these structures.

260  
261 In tufted ducks, both transmembrane and secreted glycopeptides terminated with  
262 Neu5Ac $\alpha$ 2,3 or Neu5Ac $\alpha$ 2,6 were identified (Table S7). Approximately equal ratios of the  
263 number of sialylated *N*- vs. *O*-linked glycans were detected in all tissues except for ileum  
264 that had dominance of *N*-linked glycans. Fucosylated sialylated glycan structures were  
265 detected in all tissues, with the highest amounts in trachea and lowest in ileum.  
266 Neu5Ac $\alpha$ 2,3 was detected in all tissues, with a strong accentuation in trachea (Figure 6a-  
267 c). Neu5Ac $\alpha$ 2,6 was detected in all tissues, but the presence was lower in lung. Disialo  
268 glycan structures with both Neu5Ac $\alpha$ 2,3 and Neu5Ac $\alpha$ 2,6 were hardly detectable in tufted  
269 duck tissues, and only present in trachea and lung at low levels. In chickens,  
270 glycopeptides originating from both transmembrane and secreted glycoproteins  
271 terminating with Neu5Ac $\alpha$ 2,3 or Neu5Ac $\alpha$ 2,6 were identified (Table S8). In trachea, lung,  
272 and ileum sialylated *N*-linked glycans dominated and in colon there was a very high  
273 dominance of sialylated *N*-linked glycans over sialylated *O*-linked glycans. Fucosylated  
274 sialylated glycans were more common in trachea and colon than in lung and ileum.  
275 Neu5Ac $\alpha$ 2,3 was found at similar levels in all sampled tissues, but somewhat  
276 concentrated in trachea (Figure 6) and Neu5Ac $\alpha$ 2,6 was found in similar levels in all  
277 sampled tissues.

278

279 Comparing expressed glycans terminating with  $\alpha$ 2,3- or  $\alpha$ 2,6-linked Neu5Ac in different  
280 organs between the three species hence revealed great similarities. One important  
281 exception was that the abundance of Neu5Ac $\alpha$ 2,3 terminated fucosylated (sialyl lewis)  
282 glycan structures in ileum varied with the highest abundance in mallards and lowest in  
283 tufted ducks. In common for all three species, Neu5Gc could not be detected in any of the  
284 tissues. Furthermore, despite previously published *in vitro* data suggesting tropism of  
285 chicken origin AIV isolates for sulfated sialylated glycopeptides [12,15](#), no such structures  
286 were identified in any of the samples. However, the recently identified putative AIV  
287 receptor structures, phosphorylated high-Man *N*-linked glycopeptides [38,39](#) were identified  
288 in both mallard and chicken samples (not tested in tufted ducks) (Figure 6). These  
289 glycopeptides were mainly from predicted lysosomal enzymes, including  
290 carboxypeptidase and aminopeptidase.

291

## 292 **Discussion**

293

294 Molecular barriers for transmission of influenza A viruses between birds and to humans  
295 can be classified into A) host related factors: e.g. species-specific physiological,  
296 biochemical and immunological differences; and B) virus related factors: e.g. subtypes,  
297 sublineage specific genetic markers associated with adaptation to a specific host as well  
298 as receptor and organ tropism<sup>40</sup>. Mallards are regarded as a key reservoir of AIV, as they  
299 carry almost all known AIV subtypes [41,42](#) and show limited signs of disease even when  
300 infected with HPAIV [43](#), which causes significant morbidity and mortality in other bird  
301 species, including closely related ducks, such as tufted ducks [44,45](#), and in chickens [46](#).  
302 Through experimental infections together with in-depth molecular characterization of host  
303 AIV receptor expression, host response and viral genetic changes during infection, we  
304 demonstrate a number of important features central to interspecies transmission.

305

306 First, we found that LPAIVs preferentially replicated in the respiratory tract of tufted ducks  
307 and chickens. Although this might have been driven by method of inoculation, it is in sharp  
308 contrast to LPAIV infection in mallards, where the infection is well-documented in the  
309 surface epithelium of the gastrointestinal tract [24,47](#). The unsuccessful infection of tufted

310 ducks via the intraesophageal route was unexpected as both mallards and tufted ducks  
311 belong to the Anatidae family [48](#), and it is long assumed that all duck species share mode  
312 of IAV transmission. On the other hand, epizootical studies have shown that AIV  
313 prevalence differs dramatically between species within the Anatidae family [49](#). Additionally,  
314 studies using virus histochemistry found more virus staining in trachea, rather than colon  
315 for several non-mallard species including tufted duck [23,25](#) suggesting differences in  
316 receptor expression. Taken together, our findings suggest that such differences in AIV  
317 prevalence between bird species are due to differences in AIV tropism and infectivity,  
318 acting as barriers for interspecies transmission.

319  
320 Second, we found differences in the outcome of infection across the different AIV subtypes  
321 tested. Notably, H6N2 was shed at high loads both in oropharyngeal swabs and in tissue  
322 samples from both bird species. This virus subtype is very common in wild mallards [41,50,51](#)  
323 and has been demonstrated to infect gallinaceous birds including pheasants and quails [52](#)  
324 as well as chickens [53](#). On the other hand, the unsuccessful infection in chickens with the  
325 H9N2 subtype was unexpected as LPAIV H9N2 is endemic in chickens in many countries  
326 [54](#). The fact that the HA gene of our H9N2 isolate was phylogenetically distinct from  
327 chicken endemic H9N2 isolates suggests the importance of sublineages within the same  
328 AIV subtype that seem to be adapted to different host species. Furthermore, in some of  
329 the viruses used in this study, we identified putative SNPs that may be related to infection  
330 of a new host and provide candidates for further studies on their role in host adaptation.

331  
332 Thirdly, transcriptomic analysis illuminated that the host response to virus challenge was  
333 different in chickens vs. tufted ducks. For instance, LPAIVs H3N8 and H4N6 generated  
334 the least number of DEGs in investigated chickens, whereas the same subtypes yielded  
335 the greatest number of DEGs in tufted ducks (see Figure S4). The H6N2 subtype gave  
336 the most consistent upregulation of IFN related genes in chickens, consistent with its  
337 replication to high titres in lungs, spleens and colons. However, a similar response to this  
338 subtype was not detected in tufted ducks despite the presence of the *RIG-I* gene in this  
339 species. It should be emphasized though, that the samples in our experiments were taken  
340 at 3 d.p.i. whereas in other studies, the strongest innate immune responses to IAV  
341 infection in chickens and ducks take place 1-2 d.p.i. [26,55,56](#). The up-regulation of *ZC3H11B*

342 in chickens is interesting and merits further study as the A ortholog was described to be  
343 involved in nuclear export of mRNA in humans and knocking this gene out in HeLa cells  
344 resulted in reduced growth of the IAV strain H1N1 A/WSN/33 [37](#). Taken together, only  
345 minor changes in gene expression were identified in virus challenged birds, well in line  
346 with earlier reports of LPAIV only inducing mild response in birds [26.55.56](#). Particularly, both  
347 in terms of number of significant DEGs identified and particular up-/down-regulated  
348 DEGs, clear differences could be observed in host response to virus challenge between  
349 chickens vs. tufted ducks suggesting a marked difference in host response to virus  
350 challenge between species.

351  
352 Finally, species specific differences in the glycan structures serving as receptors for AIV  
353 have been proposed as important barriers for interspecies transmission, most importantly  
354 the receptor tropism for  $\alpha$ 2,3 vs.  $\alpha$ 2,6-linked Neu5Ac as a hallmark of AIV vs. human  
355 adapted IAV [10.11.57](#). The results of our glycoproteomic characterization of the avian sialic  
356 acid containing glycoconjugates provide a number of important insights into these  
357 aspects: Structures containing Neu5Ac $\alpha$ 2,6 were detected in all sampled avian tissues.  
358 In contrast to earlier studies suggesting that avian glycosylation produce shorter, less  
359 complex glycans compared to human glycosylation [58](#), we demonstrate that longer  
360 sialylated glycan structures were present in all analyzed avian tissues as well (Table S6-  
361 9, Figure 6, and Figure S9). Sulfated 3'SLN and S-Le<sup>x</sup> have been suggested as main  
362 receptors for H7 AIVs, H5 AIVs isolated from chickens, and gull-specific H13 and H16  
363 viruses [12.13.59](#). However, no sulfated sialylated glycopeptides were identified in any of the  
364 investigated avian samples (including chickens), challenging the biological relevance of  
365 Sulfated-3'SLN and Sulfated-S-Le<sup>x</sup> as major AIV receptors. Instead, phosphorylated high-  
366 Man *N*-glycopeptides were identified in both the mallard and chicken samples (not tested  
367 in tufted duck). This is of high interest as IAVs (of avian, human, and swine origin) recently  
368 were described to bind human lung-derived phosphorylated non-sialylated glycans  
369 (particularly Man-6P containing glycans) in a SA-independent manner [38](#). We identified  
370 these *N*-glycopeptides on predicted lysosomal enzymes, including carboxypeptidase and  
371 aminopeptidase. It can be speculated that IAV binding to phosphorylated glycans takes  
372 place during late phase cellular entry, facilitating the virus uncoating process by targeting  
373 lysosomal enzymes [60](#). Tropism for *N*-glycolyl-neuraminic acid, Neu5Gc, in wild type AIVs

374 is extremely rare and this structure has not been found in birds [61](#). Indeed, Neu5Gc was  
375 not detected in our glycoproteomic analysis in any of the avian species. Taken together,  
376 these results not only indicate great similarities in IAV receptor expression between the  
377 three bird species, but also demonstrate that avian glycosylation and the expression of  
378 glycan structures in avian tissues is more similar to that seen in mammalian tissues than  
379 what was previously anticipated.

380  
381 In conclusion, the experimental design of this study allowed us to address the role of  
382 multiple factors as barriers for successful AIV interspecies transmission. The results  
383 suggest that not only are factors related to the physiology of the infected species  
384 important, but also route of infection, virus phylogeny (as exemplified by the mallard-  
385 derived H9N2 LPAIV in chickens) and host response. Moreover, extensive glycoproteomic  
386 analysis of the avian respiratory and intestinal tracts clearly demonstrated that birds can  
387 produce longer sialylated Lewis structures, as well as both *N*- and *O*-linked glycans  
388 terminated with  $\alpha$ 2,6-linked Neu5Ac. This is contrary to the current dogma whereby these  
389 structures were believed to be mammal specific, suggesting that available receptors in  
390 mammals and birds are more closely related than previously thought. Receptor  
391 incompatibility has been the major focus of AIV interspecies barrier research for the past  
392 decades. However, our results suggest that the importance of the proposed receptor  
393 barrier might be limited. Instead, we propose that IAV interspecies transmission depends  
394 on several host factors (physiology, host immune response, receptor configuration and  
395 expression) and viral factors (route of infection, viral phylogeny and genetic makeup). All  
396 these factors need to be considered and studied in order to achieve a thorough  
397 understanding of IAV interspecies transmission enabling a prudent pandemic  
398 preparedness planning.

399

400

## 401 **Methods**

402

### 403 *Ethical statement*

404 All procedures of virus screening and propagation were handled in biosecurity level 2  
405 (BSL2) facilities at the Zoonosis Science Center, Uppsala University. All animal

406 experiments were carried out in strict accordance with a protocol legally approved by the  
407 regional board of the animal ethics committee, Sweden (permission number 5.8.18-  
408 07998/2017). All animal experiments were conducted in BSL2 animal facilities at the  
409 Swedish National Veterinary Institute (SVA).

410

#### 411 *Origin of viruses and virus propagation*

412 Viruses used in the current study were obtained from the Linnaeus University AIV  
413 repository (Table 1), and collected and isolated as described in [41](#). Briefly, viruses were  
414 isolated from mallards captured at a long-term study site at Ottenby bird observatory,  
415 Sweden (56°12' N 16°24' E). Viruses were propagated in the allantoic cavity of 11-day-  
416 old specific pathogen free embryonated chicken eggs and harvested fluid was stored at  
417 -70 °C until further use. The egg infectious dose 50 (EID<sub>50</sub>) of the inoculum was  
418 determined by infection in embryonated chicken eggs [62](#).

419

#### 420 *Strain selection*

421 We selected AIVs comprising eight subtypes of different phylogenetic lineages that have  
422 all been detected in the avian reservoir with different frequencies (Table S1). These  
423 include those AIVs that are common in mallards at this study site (H4N6 and H6N2) and  
424 elsewhere (H3N8), as well as those that are less commonly isolated (H8N4, H9N2,  
425 H10N1, H11N9, H15N5). For H15N5 there have only been 14 detections ever defined  
426 (<https://www.fludb.org/>; access 1 July 2020), 6 of which are from this study site. Subtypes  
427 seldomly detected in wild bird surveillance (H8N4 and H15N5) may have hosts in  
428 undersampled bird species such as diving ducks, although this is still unclear. H9N2 is  
429 more common in poultry than in ducks. H10 viruses are isolated from the broadest host  
430 range, with infections common in ducks, chickens, seals, and with multiple records of  
431 zoonotic infections.

432

#### 433 *Pathogenicity and transmissibility in chickens and tufted ducks*

434 A total of 72 white leghorn chickens (*Gallus gallus domesticus*) were raised until 3 weeks  
435 old at the SVA. Tufted ducks (*Aythya fuligula*) 3-6 weeks old were obtained from  
436 Snavelhof, Veeningen, the Netherlands. All animal experiments were carried out in a  
437 biosecurity level two animal facility at the SVA. Birds were divided into groups of four and

438 inoculated with one of the eight viruses or a phosphate buffered saline (PBS) mock. Thirty-  
439 six individuals of each species were inoculated intraesophageally (IE) and 36 were  
440 inoculated oculonasally (ON), using an inoculum of  $10^6$  EID<sub>50</sub> per 1 mL per bird. For the  
441 mock groups, 1 mL of PBS was used per bird. Birds were monitored daily for clinical signs  
442 and mortality until 3 days post infection (d.p.i.), when all birds from each group were  
443 euthanized by injection of 1 mL of pentobarbital (100 mg). In order to compare virus  
444 shedding patterns via the respiratory and/or digestive tract, oropharyngeal (OP) and  
445 cloacal (CL) swabs were taken every day from all birds and placed in Virus Transport  
446 Media (Glycerol 10% vol/vol; Hanks 1x; Balanced Polymyxin sulphate B 100U/mL;  
447 Nystatin 50u/mL; Lactalbumin 5g/L; Penicillin 200U/mL; Streptomycin 200microl/mL;  
448 Gentamycin 250microl/mL; MQ water). Tissue samples were collected from lung, colon,  
449 and spleen of euthanized birds to study virus distribution as well as the transcriptomic host  
450 response to infection.

451  
452 *Reverse Transcriptase quantitative real-time-PCR*  
453 Viral RNA was extracted from the OP and CL swab samples collected from chickens and  
454 tufted ducks using Maxwell® 16 Viral Total Nucleic Acid Purification Kit on a Maxwell® 16  
455 System extraction robot (Promega, Madison, WI, USA). RNA was isolated from lung,  
456 colon and spleen of all ON inoculated birds using TissueLyser II and RNeasy Mini Kit  
457 (Qiagen, Hilden, Germany). Quantification of the viral load (expressed as egg infective  
458 dose 50 (EID<sub>50</sub>) equivalent, as defined below) from the swab samples was based on Cq  
459 values obtained by reverse transcriptase quantitative real-time PCR (RT-qPCR) targeting  
460 the matrix (M) gene <sup>63</sup> and using AgPath-ID One-Step RT-PCR reagent kit (Thermo Fisher  
461 Scientific, Waltham, MA, USA) on a BioRad CFX1000 Real-Time PCR System (BioRad,  
462 Hercules, CA, USA).

463 We calculated EID<sub>50</sub> equivalent by determining the Cq values from a known EID<sub>50</sub>  
464 reference virus inoculum. From this data we generated a standard curve (Figure S10)  
465 correlating these measurements and used this curve to predict EID<sub>50</sub> equivalents from Cq  
466 data for all virus experiments.

467

468

469 *Whole genome sequencing and variant detection*

470 Total viral RNA was extracted from the virus inocula, all organs with a Cq value < 30, and  
471 positive swabs at 3 days post infection (d.p.i.) with a Cq value < 30 (Table 1) using  
472 QIAamp viral RNA Mini kit (Qiagen, Hilden, Germany) according to the kit protocol. Virus  
473 whole-genome amplification was undertaken as described by [Pohlmann, et al. 64](#). Sample  
474 quality control was assessed using a Qubit 4 Fluorometer (using Qubit™ dsDNA BR assay  
475 Kit) and Agilent 2200 TapeStation (using Agilent D5000 ScreenTape assay kit). Library  
476 construction and sequencing was undertaken at Novogene (Beijing, China). The genomic  
477 DNA was randomly fragmented to size of 350bp, and then DNA fragments were end  
478 polished, A-tailed, and ligated with the adapters of Illumina sequencing, and further PCR  
479 enriched with primers of P5 and P7 oligos. The PCR products as final construct of the  
480 libraries were purified followed by quality control test. 150 bp paired reads were generated  
481 with a sequencing depth of 9-12 million reads per sample on the Illumina platform  
482 NovaSeq 6000.

483 For variant detection, generated reads were analysed using Geneious Prime work  
484 package (Biomatters, Auckland, New Zealand) through the following pipeline: Initially, the  
485 primer sequences were trimmed off from the raw reads using the “Trim Ends” Geneious  
486 Prime plugin. Further, the trimmed reads were mapped using bowtie2 implemented in  
487 Geneious Prime against the whole genome sequence obtained from the used  
488 homologous inoculum, and a consensus sequence was generated for each sample.  
489 Finally, SNP (single nucleotide polymorphism) calling was conducted using  
490 “variation/SNPs” plugin implemented in Geneious Prime work package on the assembled  
491 contigs with a maximum variant p-value of  $10^6$ .

492

### 493 *Serology*

494 To confirm that all birds were seronegative prior to infection, blood samples were collected  
495 using vacutainer serum plus blood collection tubes (BD, Becton, Dickinson and Company,  
496 New Jersey, USA) from all animals 2 days prior to the first animal experiment. Serum was  
497 recovered by centrifugation of the tubes at 1000 g for 5 minutes. Samples were examined  
498 for AIV-specific antibodies using the Influenza A nucleoprotein (NP) antibody competition  
499 ELISA kit (Idexx, Hoofddorp, The Netherlands) according to the manufacturer’s  
500 instructions.



501  
502 *Transcriptomics*  
503 Gene expression was quantified in lung, colon and spleen for all birds three d.p.i using  
504 QuantSeq 3' mRNA sequencing [65](#). For this purpose, 25 mg of each tissue was  
505 homogenized using Qiagen TissueLyser II, and RNA was extracted using RNeasy Mini  
506 Kit and DNase treated using the RNase-Free DNase Set (Qiagen, Hilden, Germany). The  
507 quantity and quality of the RNA was assessed using the Qubit (Qubit RNA BR Assay Kit,  
508 Invitrogen, CA, USA) and the Agilent 2100 Bioanalyzer system (Agilent RNA 6000 Nano  
509 Kit, CA, USA). The library preparation was conducted using the QuantSeq 3' mRNA-Seq  
510 Library Prep Kit (FWD) (Lexogen Inc., Greenland, USA) according to the manufacturer's  
511 instructions. Samples were sequenced (75bp single-end reads) on the Hiseq 4000  
512 platform (Illumina Inc., CA, USA). The raw QuantSeq reads were trimmed using the  
513 BBDuk program in the package BBMap (<https://sourceforge.net/projects/bbmap/>) to  
514 remove adapter sequences, poly-A tails, overrepresented sequences, and low-quality  
515 bases with the following parameters: k = 13, ktrim = r, useshortkmers = t, mink = 5, qtrim  
516 = r, trimq = 10, minlength = 20. Read quality before and after trimming was checked using  
517 FASTQC 0.11.5 [66](#). The trimmed sequences were aligned to the chicken reference  
518 genome (GRCg6a, Ensembl release 99, accession number GCA\_000002315.5) and the  
519 tufted duck reference genome (bAytFul2.pri, GenBank release 236, accession number  
520 GCA\_009819795.1) using STAR 2.5.3a [67](#). For the STAR indexing step, the tufted duck  
521 gff annotation file from NCBI was converted into gtf format using the gffread utility in the  
522 Cufflinks software 2.2.1 [68](#). Read counts per gene were calculated in STAR 2.5.3a.  
523 Bioconductor DESeq2 v1.24.0 [69](#) program in R v3.6.1 (RCoreTeam, 2016) was used to  
524 calculate statistical differences of the expression levels of genes between the control birds  
525 and the infected birds for each species and tissue (four individuals per group). Cut-off  
526 values for significant genes were set to an FDR of <0.05 and to genes that were up- or  
527 downregulated more than 10%, based on visual inspection of volcanoplots generated in  
528 the EnhancedVolcano package [70](#) in R v3.6.1 [71](#).  
529 To allow for comparisons of gene expression levels between chicken and tufted duck, a  
530 best hit (RBH) analysis was conducted. For this purpose, the DNA sequence information  
531 for coding sequences (cds) from chicken (GRCg6a, Ensembl release 99) was  
532 downloaded. The gffread utility from the STRINGTIE package [72](#) was then used to

533 generate a FASTA file with the DNA sequences for the coding sequences in the tufted  
534 duck. The coding sequences were reciprocally blasted using blastn [73](#). RBHs were  
535 identified using the python script reciprocal\_blast\_hits.py  
536 <https://scriptomika.wordpress.com/2014/01/28/extract-best-reciprocal-blast-matches/>.  
537 To compare the response between treatment groups the overlap of differentially  
538 expressed genes between groups treated with different virus subtypes within one species,  
539 and between groups treated with the same virus subtypes between the two species were  
540 visualised using the UpSetR package v 1.4.0 [74](#) in R v3.6.1 [75](#).

541  
542 *Transcriptomic response and gene ontology*  
543 Gene expression levels for genes associated with innate immune response, transcription,  
544 glycosylation, and inflammation were visualized in heatmaps. Significantly differentially  
545 expressed genes associated with these functions were identified by filtering the DESeq2  
546 output files for gene names identical to the list disclosed in supplementary Table S1 or  
547 gene names including any of the search terms disclosed in supplementary Table S2 and  
548 S3 or gene descriptions including “defensin” or “gallinacin” (for  $\beta$ -defensins/gallinacins). A  
549 threshold for significant DEGs was set at  $\geq 10\%$  fold change relative to control birds and  
550 an adjusted p-value  $\leq 0.05$ . Gene ontology and pathway analysis were undertaken for  
551 differentially expressed genes (adjusted p-value  $\leq 0.05$ ) for each virus/bird species/organ.  
552 Gene set analysis/overrepresentation analysis was conducted using the Webgestalt web  
553 interface (<http://webgestalt.org/>) searching the gene ontology database for “molecular  
554 function”, “cellular component”, and “biological process”. Additionally, pathway analysis  
555 was conducted searching KEGG using the Webgestalt web interface as well. Ontology  
556 terms/pathways with a FDR $\leq 0.05$  were visualised in heatmaps.

557  
558 *Epithelial cell isolation for glycoproteomic analysis*  
559 Tissue samples were collected from trachea, lung, ileum, and colon of captive healthy  
560 uninfected mallards, chickens and tufted ducks (5 individuals per species). The biopsies  
561 were rinsed in chilled ( $\sim 8$  °C) PBS (Sigma-Aldrich AB, Stockholm, Sweden) upon  
562 collection to remove any debris. Adipose tissue, blood vessels, etc. was removed and the  
563 intestinal specimens were cut open and intestinal content and mucus was carefully  
564 removed. Cleaned tissue samples were incubated at 37 °C for 1 h in 10 mL DPBS with 1

565 mM DTT and 3 mM EDTA (Sigma-Aldrich). After incubation, the liquid was carefully  
566 aspirated and replaced with PBS (Sigma-Aldrich). The samples were vortexed for 5x20 s  
567 and the tissue was then removed. The remaining cell slurry was spun at 1000 g for 5 min  
568 at 4 °C and the supernatant was discarded. The pellets were snap-frozen in liquid nitrogen  
569 and stored at -80 °C.

570

### 571 *Protein digestion, enrichment and fractionation*

572 The samples were homogenized using the lysis matrix D on FastPrep®-24 instrument  
573 (MP Biomedicals, OH) in lysis buffer (50 mM triethylammonium bicarbonate (TEAB), 2%  
574 sodium dodecyl sulfate (SDS)) and 5 cycles 40 s each. The samples were centrifuged at  
575 maximum speed for 15 min, and supernatants harvested. The protein concentration was  
576 determined using Pierce™ BCA Protein Assay (Thermo Fisher Scientific) and the  
577 Benchmark Plus microplate reader (BIO-RAD) with BSA solutions as standards.

578 Sample aliquots (500–1000 µg) were digested with trypsin using the filter-aided sample  
579 preparation (FASP) method [76](#), with small modifications. Briefly, samples were reduced  
580 with 100 mM dithiothreitol at 60°C for 30 min, spin-filtered (30 kDa MWCO Pall Nanosep  
581 centrifugation filters, Sigma-Aldrich), washed repeatedly with 8 M urea and followed by  
582 digestion buffer (1% sodium deoxycholate (SDC) in 50 mM TEAB) prior to alkylation with  
583 10 mM methyl methanethiosulfonate in digestion buffer for 20 min. Protein digestion was  
584 performed in digestion buffer by addition of 5 µg Pierce MS grade Trypsin (Thermo Fisher  
585 Scientific) at 37°C overnight, followed by an additional 2 h incubation with new trypsin  
586 added the consecutive day. Peptides were isolated by centrifugation and SDC was  
587 removed by acidification with 10% trifluoroacetic acid. Glycopeptides were enriched with  
588 hydrophilic interaction liquid chromatography (HILIC) according to [77](#), with slight  
589 modifications. In short, peptides were loaded onto an in-house zwitterionic Zic-HILIC SPE  
590 cartridge containing 20 mg of Zic-HILIC particles (10 µm, 200 Å; Sequant/Merck). The  
591 flow-through was collected and re-circulated through the column an additional three times.  
592 The column was washed with totally 1.2 mL of 80 % (v/v) acetonitrile and 1 % (v/v)  
593 trifluoroacetic acid. Enriched glycopeptides were eluted with 4 times 50 µL 0.1 % (v/v)  
594 trifluoroacetic acid followed by 50 µL of 25 mM NH<sub>4</sub>HCO<sub>3</sub> and finally 50 µL of 50 % (v/v)  
595 acetonitrile and dried by vacuum centrifugation. The samples were fractionated into six  
596 fractions (5.0-17.5 % acetonitrile in 0.1% trimethylamine), using Pierce high pH reversed-

597 phase peptide fractionation kit (Thermo Fisher Scientific) according to the manufacturer's  
598 protocol and pooled into 3 samples. Pooled samples were dried in a vacuum centrifuge  
599 and reconstituted in 15  $\mu$ L of 3 % acetonitrile, 0.1 % formic acid for LC-MS/MS analysis.

600  
601 *NanoLC MS analysis*  
602 Peptide samples were analyzed on an Orbitrap Fusion Tribrid mass spectrometer  
603 interfaced with Easy-nLC1200 liquid chromatography system (Thermo Fisher Scientific).  
604 Peptides were trapped on an Acclaim Pepmap 100 C18 trap column (100  $\mu$ m x 2 cm,  
605 particle size 5  $\mu$ m, Thermo Fischer Scientific) and separated on an in-house packed  
606 analytical column (75  $\mu$ m x 30 cm, particle size 3  $\mu$ m, Reprosil-Pur C18, Dr. Maisch) using  
607 a linear gradient (solvent A; 0.2 % formic acid in water and solvent B; 80 % acetonitrile,  
608 0.2 % formic acid in water) from 7 % to 35 % of solvent B over 45 min followed by an  
609 increase to 100% solvent B in 5 min, and finally 100% solvent B for 10 min at a flow rate  
610 of 300 nL/min. MS<sup>1</sup> scans were performed at 120 000 resolution,  $m/z$  range 600-2000, the  
611 most abundant double or multiply charged precursors from the MS<sup>1</sup> scans were selected  
612 with a duty cycle of 3 s, isolated with a 3 Da window, fragmented with higher-energy  
613 collision induced dissociation (HCD) at 30% normalized collision energy (NCE),  $m/z$  range  
614 100-2000, and then two times at 40% NCE,  $m/z$  range 100-2000 and  $m/z$  300-2000. The  
615 maximum injection time was 118 ms and MS<sup>2</sup> spectra were detected in the Orbitrap at  
616 30 000 resolution. Dynamic exclusion was enabled with 10 ppm tolerance and 10 s  
617 duration. For selected samples, MS<sup>3</sup> was performed on the  $m/z$  657.23 ion  
618 [Neu5AcHexHexNAc]<sup>+</sup> using HCD 20% NCE at both the MS<sup>2</sup> and the MS<sup>3</sup> steps, and with  
619 detection in the ion trap.

620  
621 *Glycoproteomic data analysis*  
622 The LC-MS/MS raw files were analyzed with the Byonic software (Protein metrics) using  
623 a modified list of the glycan modifications “182 human N-glycans” and “6 most common  
624 O-glycans”, such that e.g. glycoforms with a Hex<sub>4</sub>HexNAc<sub>5</sub> core structure, differing from  
625 the normal Hex<sub>5</sub>HexNAc<sub>4</sub> complex biantennary core, were added. Further Byonic search  
626 criteria: the FASTA database was *Anas platyrhynchos* (Organism ID 8840; 27089  
627 sequences) and *Gallus gallus* (Organism ID 9031); C-terminal cleavage allowed after Lys  
628 and Arg; accuracy for MS<sup>1</sup> was 10 ppm and for MS<sup>2</sup> it was 20 ppm; static modification was

629 methylthio on Cys (+45.9877 u) and variable modification, apart from glycans, was Met  
630 oxidation (+15.9949 u). Tufted duck glycopeptides were identified using the mallard  
631 genome as template, due to non-available tufted duck genome at the time of analysis. A  
632 Byonic score cut off >300 was used for glycopeptide hits and Neu5Ac containing hits were  
633 manually verified with the following inclusion criteria 1) presence of the correct  
634 peptide+HexNAc ion with respect to the precursor mass and identified glycan mass; 2)  
635 presence of the Neu5Ac oxonium ions  $m/z$  274 and  $m/z$  292; and 3) for hits including  
636 fucose (dHex), presence of peptide+HexNAc+dHex ion for the identification of a core  
637 fucose, and/or presence of  $m/z$  512 ion (HexHexNAcdHex) for identification of Fuc on the  
638 antennae. Extracted ion chromatograms were traced at diagnostic MS<sup>2</sup> ions including  
639 peptide+HexNAc ions, chosen to identify additional glycoforms sharing the same peptide,  
640 and saccharide oxonium ions, for instance  $m/z$  274.09 for tracing Neu5Ac;  $m/z$  290.09 for  
641 tracing Neu5Gc and  $m/z$  495.18 for tracing Neu5AcHexNAc.

642  
643 The Neu5Ac $\alpha$ 2,3/Neu5Ac $\alpha$ 2,6 isomeric structures of glycopeptide hits were determined  
644 according to [78](#). Briefly, the relative LacNAc to Neu5Ac (L/N) oxonium ion ratio ( $m/z$  204  
645 +  $m/z$  366) / ( $m/z$  274 +  $m/z$  292) were calculated at an NCE of 40% for N-glycopeptide  
646 hits carrying Hex5HexNAc4NeuAc<sub>2</sub>(dHex)<sub>0-1</sub> complex biantennary structures; and for O-  
647 glycopeptide hits carrying HexHexNAc(Neu5Ac)<sub>1-2</sub> structures. The ratio was then  
648 multiplied with the stoichiometric compensation factor  $n(\text{NeuAc}) / n(\text{HexNAc})$  to obtain the  
649 normalized ratio Ln/Nn. For the MS<sup>3</sup> based methodology, the MS<sup>3</sup> spectrum of the MS<sup>2</sup>  
650 generated  $m/z$  657.23 ion was manually inspected. When the ( $m/z$  204 +  $m/z$  366) ion  
651 intensities were larger than the ( $m/z$  274 +  $m/z$  292) intensities, the linkage structure was  
652 considered as Neu5Ac $\alpha$ 2,6 and when smaller the linkage structure was considered as  
653 Neu5Ac $\alpha$ 2,3. For the MS<sup>3</sup> experiments, Byonic hits with scores <300 were also  
654 considered, provided that the same hit was present with a score >300 in the corresponding  
655 MS<sup>2</sup> experiment.

656  
657 Data and Code Availability

658 The authors declare that all data supporting the findings of this study are available within  
659 the article, its supplementary information files, or are available from the authors upon

660 request. The nucleotide sequences generated for variant detection and transcriptomic  
661 analyses (RNAseq) reported in this paper have been deposited into public databases,  
662 Sequence Read Archives, under project number PRJNA664709.

663 The mass spectrometry proteomics data have been deposited to the ProteomeXchange  
664 Consortium via the PRIDE [79](#) partner repository with the dataset identifier PXD021392.

665

## 666 **Acknowledgments**

667

668 We acknowledge Josanne Verhagen for culturing viruses and Janina Krambrich for her  
669 help in the preparation of samples for NGS analysis. We acknowledge Dr. Roy Francis  
670 (NBIS, Science for Life Laboratory) for helpful input on bioinformatics. The glycoproteomic  
671 analysis was performed at the BioMS node at the Proteomics Core Facility of Sahlgrenska  
672 Academy, University of Gothenburg. Support from the Swedish National Infrastructure for  
673 Biological Mass Spectrometry (BioMS), funded by the Swedish Research Council (VR), is  
674 gratefully acknowledged. We are grateful of Inga-Britt and Arne Lundbergs  
675 Forskningsstiftelse for the donation of the Orbitrap Fusion Tribrid MS instrument. The  
676 transcriptomic analyses were performed using computational resources at the  
677 bwUniCluster funded by the Ministry of Science, Research and the Arts Baden-  
678 Württemberg and the Universities of the State of Baden-Württemberg, Germany, within  
679 the framework program bwHPC-C5.

680

## 681 **Funding**

682 Funding for this study was obtained from the Swedish Research Council (2015-03877 and  
683 2016-02606 to JJ, 2016-02596 to BO, and 2017-00955 to G.L.)

684

## 685 **Conflict of interest**

686 We declare no conflict of interest for any of the authors.

687

## 688 **Author contributions**

689 Conceptualization: PEI, JJ, BO, AL, MW, MN, PEr

690 Animal experiment: MN, PEr, PEI, JJ, CL, CB

691 Transcriptomic analysis: EJ, PEr, RHSK, MN

692 Glycoproteomic analysis: JN, PEr, CS, BMO, GL

693 Writing — original draft: MN, PEr, PEI, EJ

694 Writing — review & editing: MN, PEr, PEI, JJ, AL, BO, JN, GL, MW, EJ, CL

695

696 **References**

- 697 1 Kreuder Johnson, C. *et al.* Spillover and pandemic properties of zoonotic viruses with high host  
698 plasticity. *Sci Rep* **5**, 14830-14830, doi:10.1038/srep14830 (2015).
- 699 2 Yen, H. L. & Webster, R. G. Pandemic influenza as a current threat. *Curr Top Microbiol Immunol*  
700 **333**, 3-24, doi:10.1007/978-3-540-92165-3\_1 (2009).
- 701 3 Katz, J. M. *et al.* The public health impact of avian influenza viruses. *Poult Sci* **88**, 872-879,  
702 doi:10.3382/ps.2008-00465 (2009).
- 703 4 Horimoto, T. & Kawaoka, Y. Pandemic threat posed by avian influenza A viruses. *Clin Microbiol Rev*  
704 **14**, 129-149, doi:10.1128/CMR.14.1.129-149.2001 (2001).
- 705 5 Short, K. R. *et al.* One health, multiple challenges: The inter-species transmission of influenza A  
706 virus. *One Health* **1**, 1-13, doi:10.1016/j.onehlt.2015.03.001 (2015).
- 707 6 Subbarao, K. The Critical Interspecies Transmission Barrier at the Animal-Human Interface. *Trop*  
708 *Med Infect Dis* **4**, 72, doi:10.3390/tropicalmed4020072 (2019).
- 709 7 Gottschalk, A. Carbohydrate residue of a urine mucoprotein inhibiting influenza virus  
710 haemagglutination. *Nature* **170**, 662-663 (1952).
- 711 8 Gottschalk, A. The influenza virus enzyme and its mucoprotein substrate. *Yale J Biol Med* **26**, 352-  
712 364 (1954).
- 713 9 Blix, F. G., Gottschalk, A. & Klenk, E. Proposed nomenclature in the field of neuraminic and sialic  
714 acids. *Nature* **179**, 1088 (1957).
- 715 10 Rogers, G. N. & Paulson, J. C. Receptor determinants of human and animal influenza virus isolates:  
716 differences in receptor specificity of the H3 hemagglutinin based on species of origin. *Virology* **127**,  
717 361-373 (1983).
- 718 11 Rogers, G. N. & D'Souza, B. L. Receptor binding properties of human and animal H1 influenza virus  
719 isolates. *Virology* **173**, 317-322 (1989).
- 720 12 Gambaryan, A. *et al.* Receptor specificity of influenza viruses from birds and mammals: new data  
721 on involvement of the inner fragments of the carbohydrate chain. *Virology* **334**, 276-283,  
722 doi:10.1016/j.virol.2005.02.003 (2005).
- 723 13 Gambaryan, A. S. *et al.* Receptor-binding properties of influenza viruses isolated from gulls.  
724 *Virology* **522**, 37-45, doi:10.1016/j.virol.2018.07.004 (2018).
- 725 14 Stevens, J., Blixt, O., Paulson, J. C. & Wilson, I. A. Glycan microarray technologies: tools to survey  
726 host specificity of influenza viruses. *Nat Rev Microbiol* **4**, 857-864, doi:10.1038/nrmicro1530  
727 (2006).
- 728 15 Gambaryan, A. S. *et al.* 6-sulfo sialyl Lewis X is the common receptor determinant recognized by  
729 H5, H6, H7 and H9 influenza viruses of terrestrial poultry. *Virology journal* **5**, 85, doi:10.1186/1743-  
730 422x-5-85 (2008).
- 731 16 Walther, T. *et al.* Glycomic analysis of human respiratory tract tissues and correlation with  
732 influenza virus infection. *PLoS Pathog* **9**, e1003223, doi:10.1371/journal.ppat.1003223 (2013).
- 733 17 Shinya, K. *et al.* Avian flu: influenza virus receptors in the human airway. *Nature* **440**, 435-436,  
734 doi:10.1038/440435a (2006).
- 735 18 Ellström, P., Jourdain, E., Gunnarsson, O., Waldenstrom, J. & Olsen, B. The "human influenza  
736 receptor" Neu5Ac alpha 2,6Gal is expressed among different taxa of wild birds. *Arch Virol* **154**,  
737 1533-1537, doi:10.1007/s00705-009-0476-8 (2009).
- 738 19 Liu, Y. *et al.* Influenza A virus receptors in the respiratory and intestinal tracts of pigeons. *Avian*  
739 *Pathol* **38**, 263-266, doi:10.1080/03079450903055363 (2009).
- 740 20 Yu, J. E. *et al.* Expression patterns of influenza virus receptors in the respiratory tracts of four  
741 species of poultry. *Journal of Veterinary Science* **12**, 7, doi:10.4142/jvs.2011.12.1.7 (2011).



- 742 21 Costa, T. *et al.* Distribution patterns of influenza virus receptors and viral attachment patterns in  
743 the respiratory and intestinal tracts of seven avian species. *Vet Res* **43**, 28, doi:10.1186/1297-9716-  
744 43-28 (2012).
- 745 22 Franca, M., Stallknecht, D. E. & Howerth, E. W. Expression and distribution of sialic acid influenza  
746 virus receptors in wild birds. *Avian Pathol* **42**, 60-71, doi:10.1080/03079457.2012.759176 (2013).
- 747 23 Eriksson, P. *et al.* Attachment Patterns of Human and Avian Influenza Viruses to Trachea and Colon  
748 of 26 Bird Species—Support for the Community Concept. *Frontiers in Microbiology* **10**, 815 (2019).
- 749 24 Wille, M., Brojer, C., Lundkvist, A. & Jarhult, J. D. Alternate routes of influenza A virus infection in  
750 Mallard (*Anas platyrhynchos*). *Vet Res* **49**, 110, doi:10.1186/s13567-018-0604-0 (2018).
- 751 25 Jourdain, E. *et al.* The pattern of influenza virus attachment varies among wild bird species. *PLoS*  
752 *One* **6**, e24155, doi:10.1371/journal.pone.0024155 (2011).
- 753 26 Bergervoet, S. A. *et al.* Susceptibility of Chickens to Low Pathogenic Avian Influenza (LPAI) Viruses  
754 of Wild Bird- and Poultry-Associated Subtypes. *Viruses* **11**, doi:10.3390/v11111010 (2019).
- 755 27 Bröjer, C. *et al.* Pathology of natural highly pathogenic avian influenza H5N1 infection in wild tufted  
756 ducks (*Aythya fuligula*). *Journal of veterinary diagnostic investigation : official publication of the*  
757 *American Association of Veterinary Laboratory Diagnosticians, Inc* **21**, 579-587,  
758 doi:10.1177/104063870902100501 (2009).
- 759 28 Bröjer, C. *et al.* Pathobiology and virus shedding of low-pathogenic avian influenza virus (A/H1N1)  
760 infection in mallards exposed to oseltamivir. *Journal of wildlife diseases* **49**, 103-113,  
761 doi:10.7589/2011-11-335 (2013).
- 762 29 Gillman, A. *et al.* Influenza A(H7N9) Virus Acquires Resistance-Related Neuraminidase I222T  
763 Substitution When Infected Mallards Are Exposed to Low Levels of Oseltamivir in Water.  
764 *Antimicrobial Agents and Chemotherapy* **59**, 5196, doi:10.1128/AAC.00886-15 (2015).
- 765 30 Gillman, A. *et al.* Resistance mutation R292K is induced in influenza A(H6N2) virus by exposure of  
766 infected mallards to low levels of oseltamivir. *PLoS One* **8**, e71230,  
767 doi:10.1371/journal.pone.0071230 (2013).
- 768 31 Gabriel, G. *et al.* The viral polymerase mediates adaptation of an avian influenza virus to a  
769 mammalian host. *Proceedings of the National Academy of Sciences of the United States of America*  
770 **102**, 18590, doi:10.1073/pnas.0507415102 (2005).
- 771 32 Lazniewski, M., Dawson, W. K., Szczepińska, T. & Plewczynski, D. The structural variability of the  
772 influenza A hemagglutinin receptor-binding site. *Briefings in Functional Genomics* **17**, 415-427,  
773 doi:10.1093/bfpg/elx042 (2017).
- 774 33 Bradley, K. C. *et al.* Analysis of Influenza Virus Hemagglutinin Receptor Binding Mutants with  
775 Limited Receptor Recognition Properties and Conditional Replication Characteristics. *Journal of*  
776 *Virology* **85**, 12387, doi:10.1128/JVI.05570-11 (2011).
- 777 34 Lee, J. *et al.* Emergence of amantadine-resistant H3N2 avian influenza A virus in South Korea.  
778 *Journal of clinical microbiology* **46**, 3788-3790, doi:10.1128/jcm.01427-08 (2008).
- 779 35 Evseev, D. & Magor, K. E. Innate Immune Responses to Avian Influenza Viruses in Ducks and  
780 Chickens. *Vet Sci* **6**, 5, doi:10.3390/vetsci6010005 (2019).
- 781 36 Huang, Y.-F., Gulko, B. & Siepel, A. Fast, scalable prediction of deleterious noncoding variants from  
782 functional and population genomic data. *Nat Genet* **49**, 618-624, doi:10.1038/ng.3810 (2017).
- 783 37 Younis, S. *et al.* Multiple nuclear-replicating viruses require the stress-induced protein ZC3H11A  
784 for efficient growth. *Proceedings of the National Academy of Sciences* **115**, E3808,  
785 doi:10.1073/pnas.1722333115 (2018).
- 786 38 Byrd-Leotis, L. *et al.* Influenza binds phosphorylated glycans from human lung. *Science Advances*  
787 **5**, eaav2554, doi:10.1126/sciadv.aav2554 (2019).
- 788 39 Byrd-Leotis, L. *et al.* Antigenic Pressure on H3N2 Influenza Virus Drift Strains Imposes Constraints  
789 on Binding to Sialylated Receptors but Not Phosphorylated Glycans. *J Virol* **93**,  
790 doi:10.1128/jvi.01178-19 (2019).

- 791 40 van Dijk, J. G., Verhagen, J. H., Wille, M. & Waldenström, J. Host and virus ecology as determinants  
792 of influenza A virus transmission in wild birds. *Current opinion in virology* **28**, 26-36,  
793 doi:10.1016/j.coviro.2017.10.006 (2018).
- 794 41 Latorre-Margalef, N. *et al.* Long-term variation in influenza A virus prevalence and subtype  
795 diversity in migratory mallards in northern Europe. *Proceedings. Biological sciences* **281**,  
796 20140098, doi:10.1098/rspb.2014.0098 (2014).
- 797 42 Jourdain, E. *et al.* Influenza virus in a natural host, the mallard: experimental infection data. *PLoS*  
798 *One* **5**, e8935, doi:10.1371/journal.pone.0008935 (2010).
- 799 43 Pantin-Jackwood, M. J. *et al.* Pathogenicity and Transmission of H5 and H7 Highly Pathogenic Avian  
800 Influenza Viruses in Mallards. *J Virol* **90**, 9967-9982, doi:10.1128/jvi.01165-16 (2016).
- 801 44 Keawcharoen, J. *et al.* Wild ducks as long-distance vectors of highly pathogenic avian influenza  
802 virus (H5N1). *Emerging infectious diseases* **14**, 600-607, doi:10.3201/eid1404.071016 (2008).
- 803 45 Kleyheeg, E. *et al.* Deaths among Wild Birds during Highly Pathogenic Avian Influenza A(H5N8)  
804 Virus Outbreak, the Netherlands. *Emerging infectious diseases* **23**, 2050-2054,  
805 doi:10.3201/eid2312.171086 (2017).
- 806 46 Wiethoelter, A. K., Beltran-Alcrudo, D., Kock, R. & Mor, S. M. Global trends in infectious diseases  
807 at the wildlife-livestock interface. *Proc Natl Acad Sci U S A* **112**, 9662-9667,  
808 doi:10.1073/pnas.1422741112 (2015).
- 809 47 Webster, R. G., Bean, W. J., Gorman, O. T., Chambers, T. M. & Kawaoka, Y. Evolution and ecology  
810 of influenza A viruses. *Microbiol Rev* **56**, 152-179 (1992).
- 811 48 Gill, F. D., D. (2019).
- 812 49 Wallensten, A. *et al.* Surveillance of influenza A virus in migratory waterfowl in northern Europe.  
813 *Emerging infectious diseases* **13**, 404-411, doi:10.3201/eid1303.061130 (2007).
- 814 50 Wilcox, B. R. *et al.* Influenza-A viruses in ducks in northwestern Minnesota: fine scale spatial and  
815 temporal variation in prevalence and subtype diversity. *PLoS One* **6**, e24010,  
816 doi:10.1371/journal.pone.0024010 (2011).
- 817 51 Ramey, A. M. & Reeves, A. B. Ecology of Influenza A Viruses in Wild Birds and Wetlands of Alaska.  
818 *Avian Diseases* **64**, 109-122, 114 (2020).
- 819 52 Root, J. J., Shriner, S. A., Ellis, J. W., VanDalen, K. K. & Franklin, A. B. Transmission of H6N2 wild  
820 bird-origin influenza A virus among multiple bird species in a stacked-cage setting. *Arch Virol* **162**,  
821 2617-2624, doi:10.1007/s00705-017-3397-y (2017).
- 822 53 Verhagen, J. H. *et al.* Discordant detection of avian influenza virus subtypes in time and space  
823 between poultry and wild birds; Towards improvement of surveillance programs. *PLoS One* **12**,  
824 e0173470, doi:10.1371/journal.pone.0173470 (2017).
- 825 54 Li, R. *et al.* Phylogeographic Dynamics of Influenza A(H9N2) Virus Crossing Egypt. *Front Microbiol*  
826 **11**, 392, doi:10.3389/fmicb.2020.00392 (2020).
- 827 55 Helin, A. S. *et al.* A rapid and transient innate immune response to avian influenza infection in  
828 mallards. *Molecular Immunology* **95**, 64-72, doi:<https://doi.org/10.1016/j.molimm.2018.01.012>  
829 (2018).
- 830 56 Vanderven, H. A. *et al.* Avian influenza rapidly induces antiviral genes in duck lung and intestine.  
831 *Mol Immunol* **51**, 316-324, doi:10.1016/j.molimm.2012.03.034 (2012).
- 832 57 Ito, T. *et al.* Molecular basis for the generation in pigs of influenza A viruses with pandemic  
833 potential. *Journal of Virology* **72**, 7367-7373 (1998).
- 834 58 Bewley, C. A. Illuminating the switch in influenza viruses. *Nature biotechnology* **26**, 60-62,  
835 doi:10.1038/nbt0108-60 (2008).
- 836 59 Gambaryan, A. S. *et al.* Receptor-binding profiles of H7 subtype influenza viruses in different host  
837 species. *J Virol* **86**, 4370-4379, doi:10.1128/jvi.06959-11 (2012).

- 838 60 Tian, W. *et al.* The glycosylation design space for recombinant lysosomal replacement enzymes  
839 produced in CHO cells. *Nature communications* **10**, 1785, doi:10.1038/s41467-019-09809-3  
840 (2019).
- 841 61 Broszeit, F. *et al.* N-Glycolylneuraminic Acid as a Receptor for Influenza A Viruses. *Cell reports* **27**,  
842 3284-3294.e3286, doi:10.1016/j.celrep.2019.05.048 (2019).
- 843 62 Reed, L. J. & Muench, H. A SIMPLE METHOD OF ESTIMATING FIFTY PER CENT ENDPOINTS<sup>12</sup>.  
844 *American Journal of Epidemiology* **27**, 493-497, doi:10.1093/oxfordjournals.aje.a118408 (1938).
- 845 63 Hoffmann, B. *et al.* New real-time reverse transcriptase polymerase chain reactions facilitate  
846 detection and differentiation of novel A/H1N1 influenza virus in porcine and human samples.  
847 *Berliner und Munchener tierarztliche Wochenschrift* **123**, 286-292 (2010).
- 848 64 Pohlmann, A. *et al.* Swarm incursions of reassortants of highly pathogenic avian influenza virus  
849 strains H5N8 and H5N5, clade 2.3.4.4b, Germany, winter 2016/17. *Sci Rep* **8**, 15,  
850 doi:10.1038/s41598-017-16936-8 (2018).
- 851 65 Moll, P., Ante, M., Seitz, A. & Reda, T. QuantSeq 3' mRNA sequencing for RNA quantification.  
852 *Nature Methods* **11**, i-iii, doi:10.1038/nmeth.f.376 (2014).
- 853 66 Andrews, S. FastQC: a quality control tool for high throughput sequence data. Available:  
854 <https://www.bioinformatics.babraham.ac.uk/projects/fastqc/> Accessed 2020 March 1 (2010).
- 855 67 Dobin, A. *et al.* STAR: ultrafast universal RNA-seq aligner. *Bioinformatics* **29**, 15-21,  
856 doi:10.1093/bioinformatics/bts635 (2012).
- 857 68 Trapnell, C. *et al.* Transcript assembly and quantification by RNA-Seq reveals unannotated  
858 transcripts and isoform switching during cell differentiation. *Nature biotechnology* **28**, 511-515,  
859 doi:10.1038/nbt.1621 (2010).
- 860 69 Love, M. I., Huber, W. & Anders, S. Moderated estimation of fold change and dispersion for RNA-  
861 seq data with DESeq2. *Genome biology* **15**, 550, doi:10.1186/s13059-014-0550-8 (2014).
- 862 70 Blighe, K. EnhancedVolcano: Publication-ready volcano plots with enhanced colouring and  
863 labeling. Available: <https://github.com/kevinblighe>. (2018).
- 864 71 R: A language and environment for statistical computing v. 3.3.2 (R Foundation for Statistical  
865 Computing, Vienna, Austria, 2016).
- 866 72 Pertea, M. *et al.* StringTie enables improved reconstruction of a transcriptome from RNA-seq  
867 reads. *Nature biotechnology* **33**, 290-295, doi:10.1038/nbt.3122 (2015).
- 868 73 Altschul, S. F., Gish, W., Miller, W., Myers, E. W. & Lipman, D. J. Basic local alignment search tool.  
869 *Journal of molecular biology* **215**, 403-410, doi:10.1016/s0022-2836(05)80360-2 (1990).
- 870 74 Conway, J. R., Lex, A. & Gehlenborg, N. UpSetR: an R package for the visualization of intersecting  
871 sets and their properties. *Bioinformatics (Oxford, England)* **33**, 2938-2940,  
872 doi:10.1093/bioinformatics/btx364 (2017).
- 873 75 R Core Team. R: A Language and Environment for Statistical Computing. R Foundation for  
874 Statistical Computing, Vienna, Austria. In: *R Core Team, ed. Sincere Pumpkin Patch. 3.3.2 ed.*  
875 (2016).
- 876 76 Wisniewski, J. R., Zougman, A., Nagaraj, N. & Mann, M. Universal sample preparation method for  
877 proteome analysis. *Nat Methods* **6**, 359-362, doi:10.1038/nmeth.1322 (2009).
- 878 77 Parker, B. L. *et al.* Site-specific glycan-peptide analysis for determination of N-glycoproteome  
879 heterogeneity. *Journal of proteome research* **12**, 5791-5800, doi:10.1021/pr400783j (2013).
- 880 78 Pett, C. *et al.* Effective Assignment of alpha2,3/alpha2,6-Sialic Acid Isomers by LC-MS/MS-Based  
881 Glycoproteomics. *Angewandte Chemie (International ed. in English)* **57**, 9320-9324,  
882 doi:10.1002/anie.201803540 (2018).
- 883 79 Perez-Riverol, Y. *et al.* The PRIDE database and related tools and resources in 2019: improving  
884 support for quantification data. *Nucleic acids research* **47**, D442-d450, doi:10.1093/nar/gky1106  
885 (2019).

886 80 Varki, A. *et al.* Symbol Nomenclature for Graphical Representations of Glycans. *Glycobiology* **25**,  
887 1323-1324, doi:10.1093/glycob/cwv091 (2015).

888

889

890 **Figures**

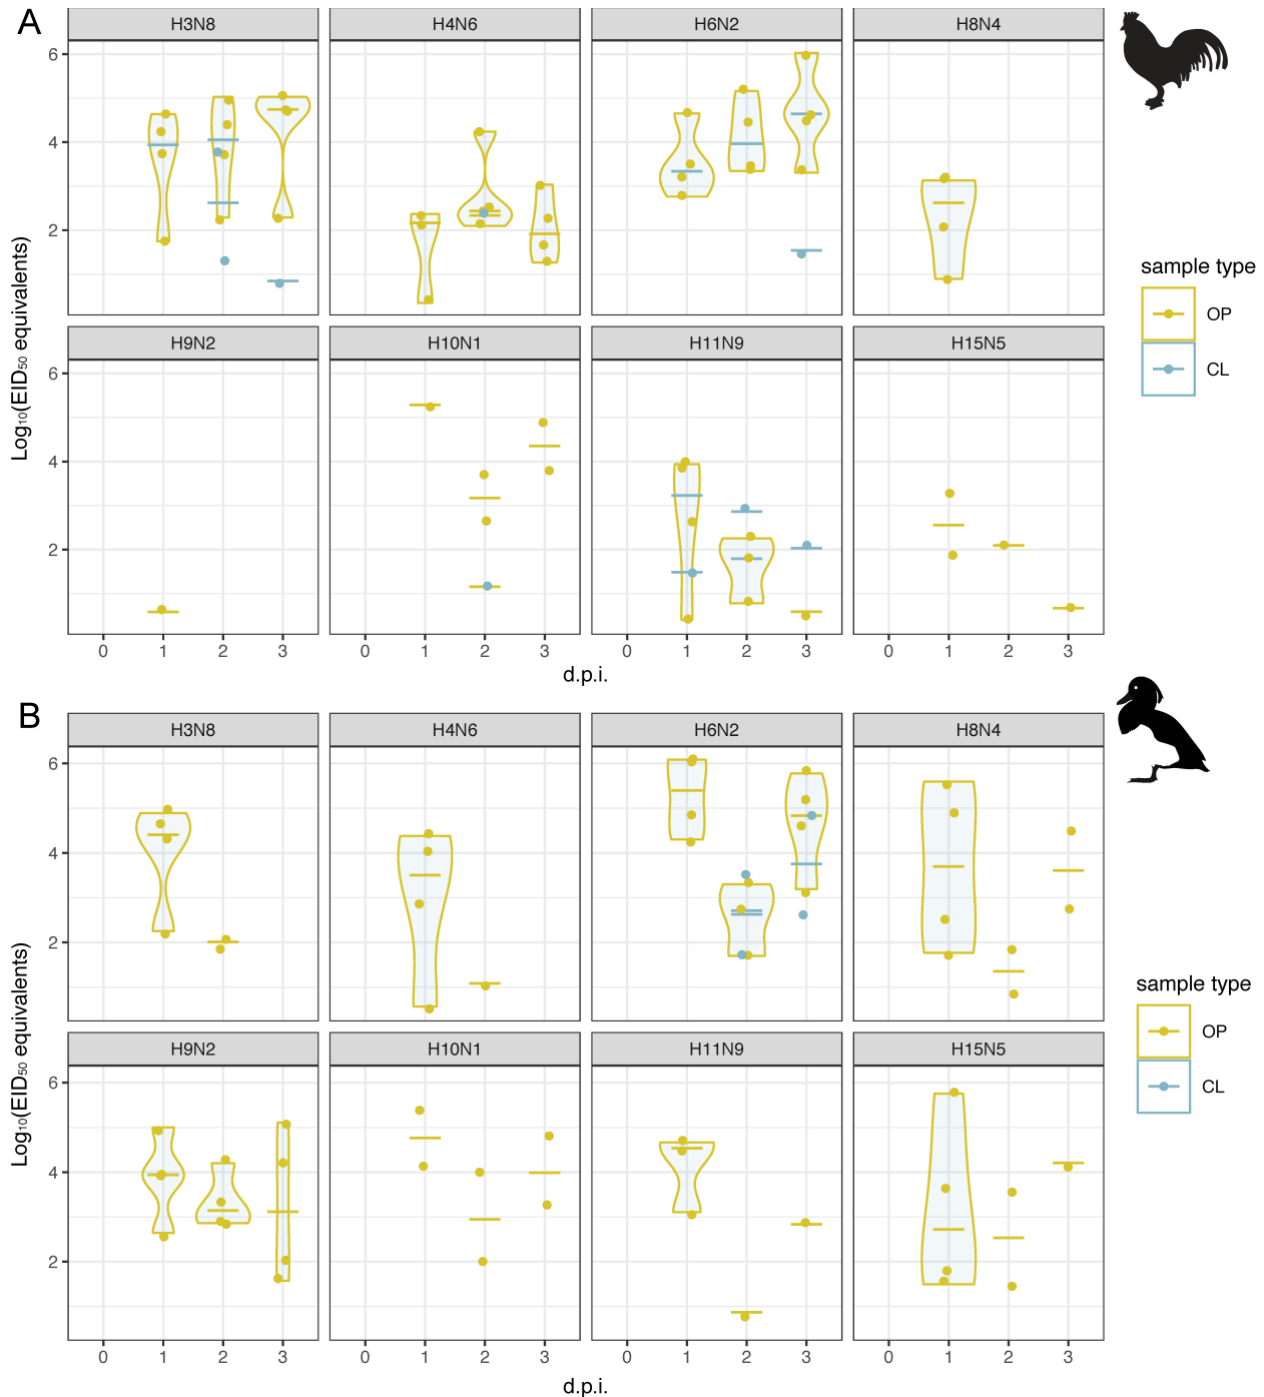

891  
892 **Figure 1. Viral load of mallard origin AIV subtypes in ocuonasally inoculated A)**  
893 **chickens and B) tufted ducks.** Four birds were inoculated with each virus respectively.  
894 Points represent positive samples and horizontal bars their respective median values, and  
895 are coloured by sample type; yellow — oropharyngeal (OP) and blue — cloacal (CL)  
896 swabs. Violins correspond to kernel density distributions of only positive samples.  
897 Negative samples are not shown. Y axis corresponds to log<sub>10</sub> egg infectious dose 50

898 equivalents, which are inferred from C<sub>q</sub> values based on the relationship reported in  
899 Figure S1  
900

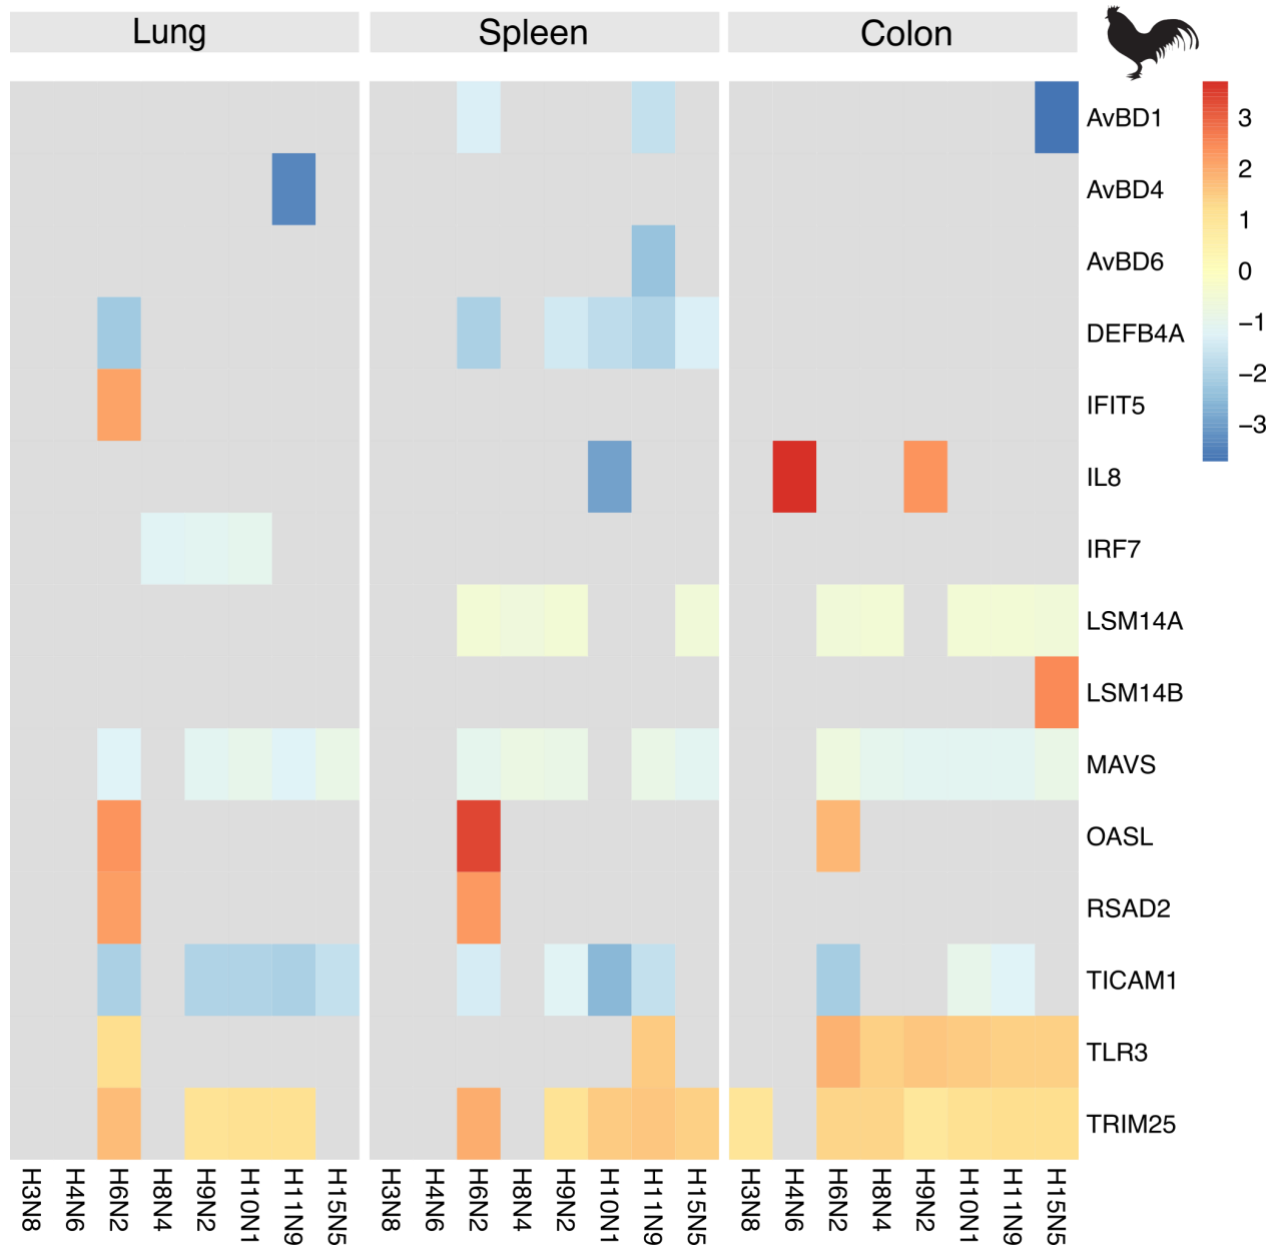

901

902

903 **Figure 2. Selected significant DEGs associated with innate immunity in chickens.**

904 Genes in the proinflammatory- or RLR signaling pathways as well as  $\beta$ -defensin genes

905 with described functions in birds were selected (Table S1) based on current literature. The

906 color indicates the log<sub>2</sub> fold change of significant (adjusted p value <0.05 and a threshold

907 of  $\geq 10\%$  fold change) DEG's relative to control birds. Grey indicates non-significant

908 DEGs. Data from lung samples is shown to the left, spleen in the center and colon on the

909 right.

910

911

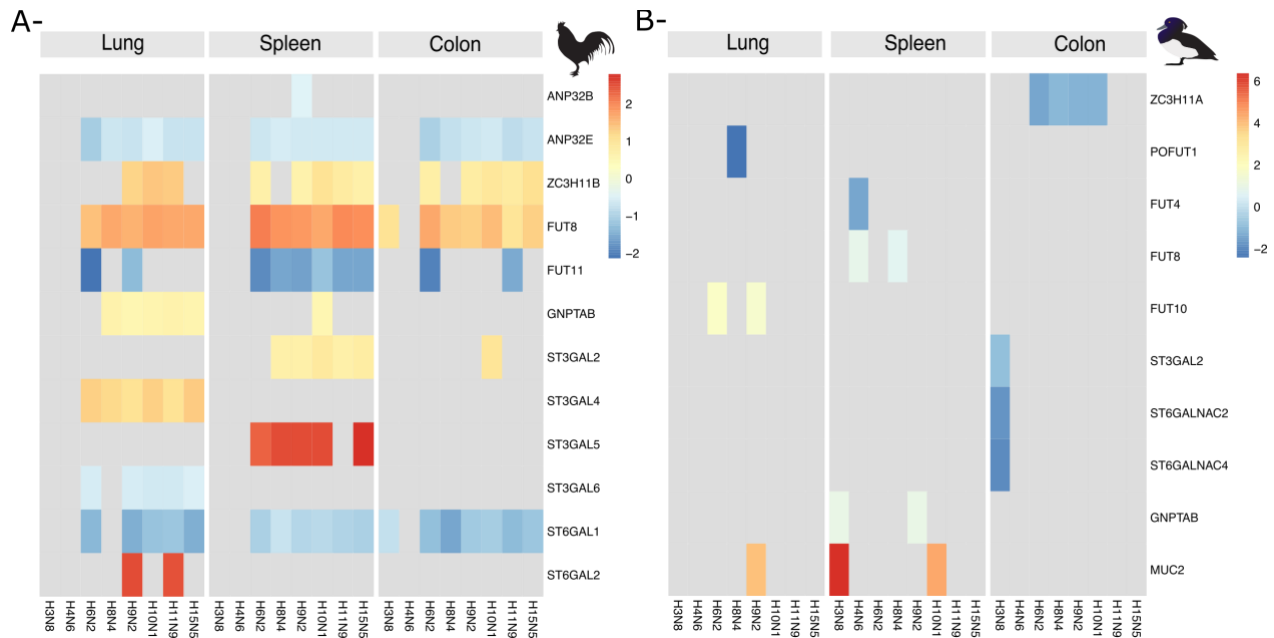

912

913 **Figure 3. Selected significant DEGs associated with glycosylation and**  
 914 **transcription in chickens and tufted ducks.** Genes with described association to  
 915 glycosylation or transcription in birds (Table S2) were selected based on current  
 916 literature. The color indicates the log<sub>2</sub> fold change of significant (adjusted p value <0.05  
 917 and a threshold of ≥ 10% fold change) DEG's relative to control birds. Grey indicates  
 918 non-significant DEGs. Data from chicken (A) and tufted duck (B) lung samples are  
 919 shown in the left panels, spleen in the center and colon in the right panels.



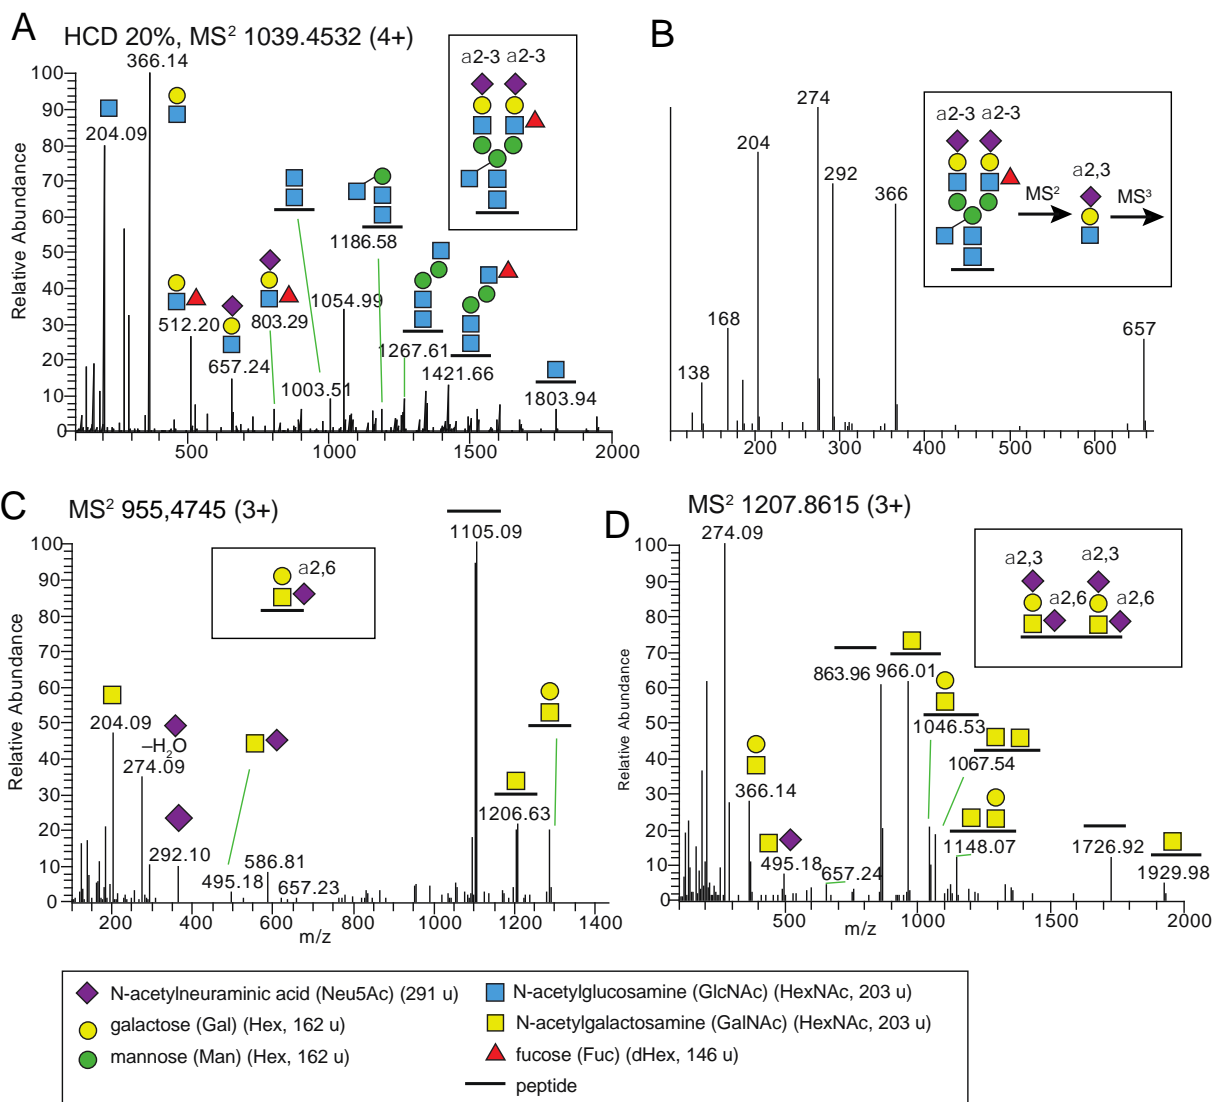

920

921 **Figure 4. An example of a longer complex disialylated and monofucosylated N-**

922 **glycan and a  $\alpha$ 2,3/ $\alpha$ 2,6 core 1 O-glycan found in mallards.** These glycan epitope

923 structures were also detected in chickens and tufted ducks. **(A)** HCD-MS<sup>2</sup> of a disialylated

924 complex biantennary N-glycopeptide including a bisecting GlcNAc and a Lewis x fucose

925 (boxed structure) from Epithelial cell adhesion molecule (U3J672\_ANAPL) with the

926 sequence R.LNVSIDNEVVQLEK.A. **(B)** MS<sup>3</sup> of the *m/z* 657 ion provided identification of

927 the Neu5Ac $\alpha$ 2,3 linkages on both antennas. **(C)** HCD-MS<sup>2</sup> of a Neu5Ac $\alpha$ 2,6 sialylated

928 core 1 O-glycopeptide from fibrinogen (U3I9E6\_ANAPL) with the

929 R.ETAPTLRPVAPPISGTGYQPR.P sequence. **(D)** HCD-MS<sup>2</sup> of two Neu5Ac $\alpha$ 2,3 and

930 Neu5Ac $\alpha$ 2,6 disialylated core 1 O-linked glycans of a glycopeptide from dystroglycan 1

931 (U3IBQ2\_ANAPL) with the R.VISEATPTLAAGKDPEK.S sequence. Glycan symbols are

932 according to the SNFG format [80](#).

933

934

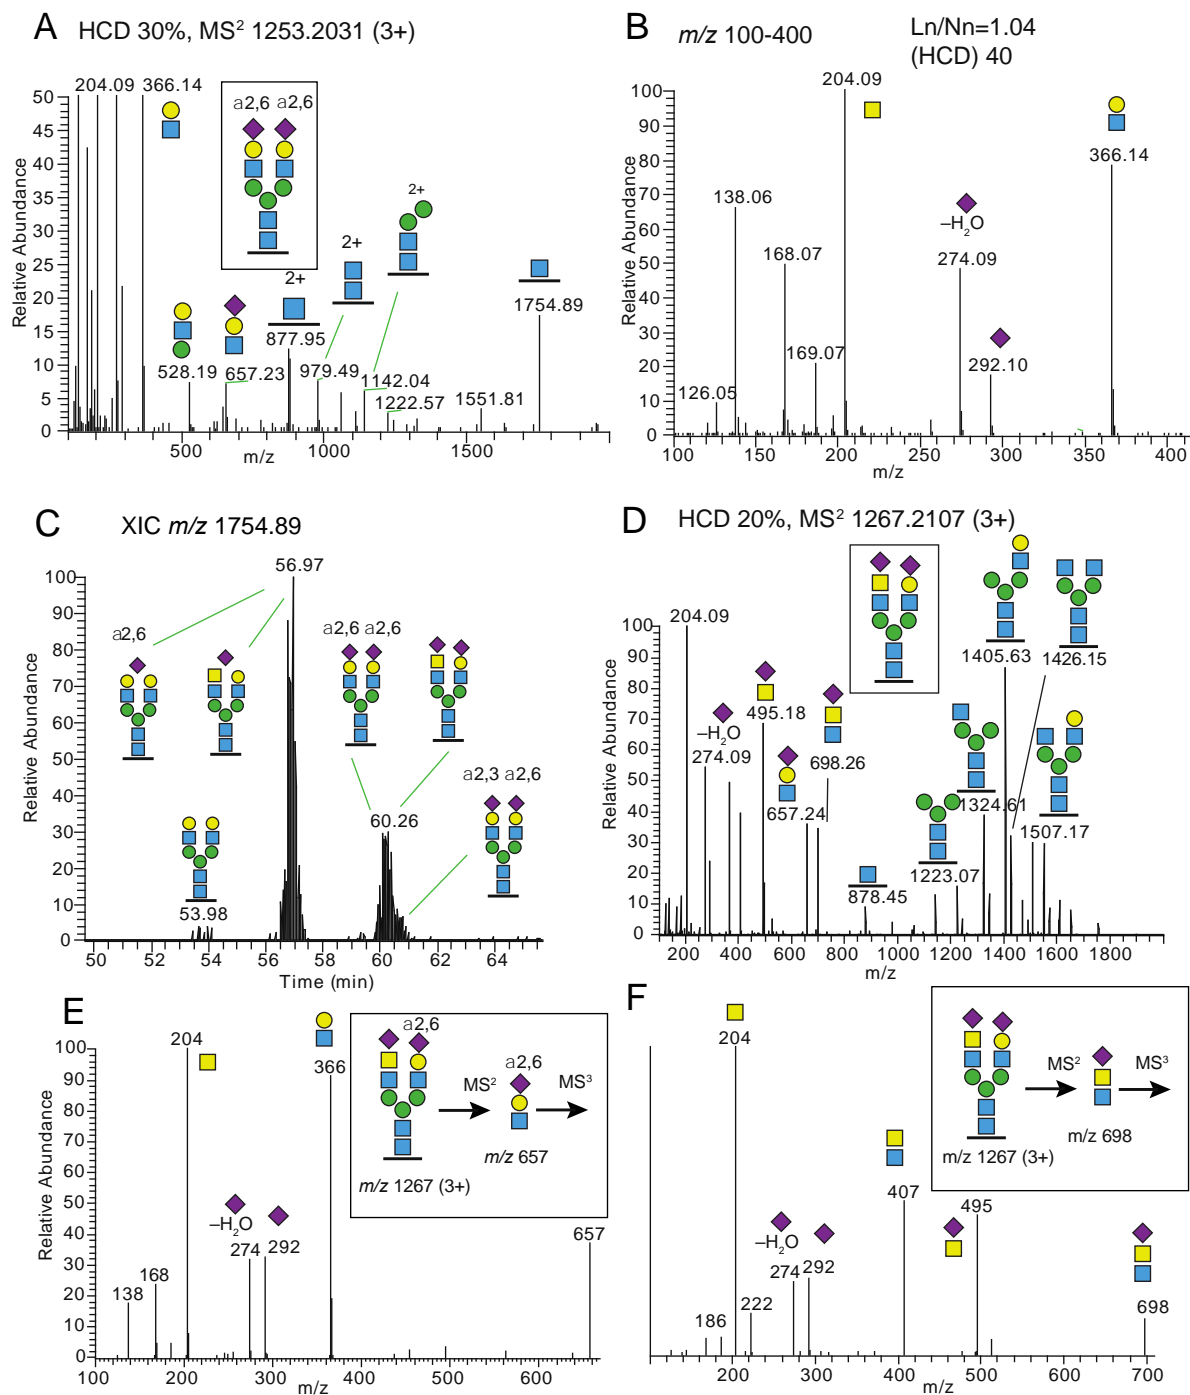

935  
 936 **Figure 5. Examples from LC-MS/MS of various Neu5Ac $\alpha$ 2,6 sialylated N-**  
 937 **glycopeptides from mallard tissues.** These glycan epitope structures were also  
 938 detected in chickens and tufted ducks. **(A)** HCD-MS<sup>2</sup> spectrum of a disialylated complex  
 939 biantennary N-glycopeptide (boxed structure) from ovotransferrin (U3J851\_ANAPL). **(B)**  
 940 The  $m/z$  100-400 region of the expanded MS<sup>2</sup> spectrum shows the presence of several  
 941 oxonium ions used to identify the Neu5Ac $\alpha$ 2,6 linkage of the sialic acids. **(C)** Extracted  
 942 ion chromatogram (XIC) of the peptide+HexNAc ion ( $m/z$  1754.89) reveals several

943 additional glycoforms of this glycopeptide, e.g. a mixed Neu5Ac $\alpha$ 2,3; Neu5Ac $\alpha$ 2,6  
944 glycoform eluting slightly after the major disialylated glycoform at ~60 min. **(D)** HCD-MS<sup>2</sup>  
945 spectrum of the Neu5Ac<sub>2</sub>Hex<sub>4</sub>HexNAc<sub>5</sub> glycoform of panel (C) reveals two different  
946 antennas. **(E)** MS<sup>3</sup> of the *m/z* 657.24 ion in panel (D) provides identification of a  
947 Neu5Ac $\alpha$ 2,6 linkage of the HexHexNAc terminated antenna; and **(F)** MS<sup>3</sup> of the *m/z*  
948 698.26 ion provides identification of Neu5Ac $\alpha$ 2,6 linkage the HexNAcHexNAc antenna.  
949 Glycan symbols are according to the SNFG format [80](#).

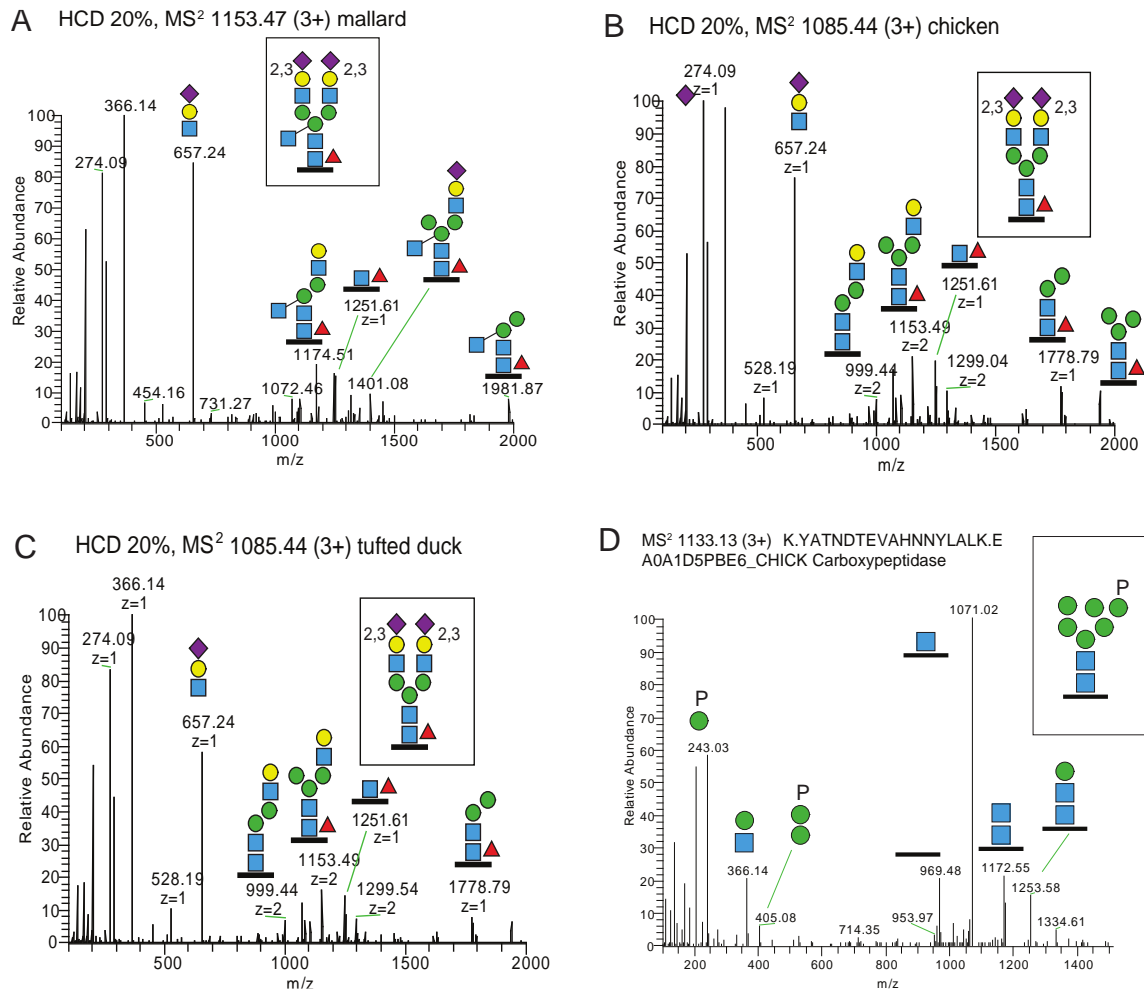

950

951 **Figure 6. LC-MS/MS of a lumican N-glycopeptide and a phosphorylated high**  
 952 **mannose glycan detected in bird tissues.** The lumican N-glycopeptide was found in  
 953 the trachea of all three species (A) mallard, (B) chicken and (C) tufted duck. The sialic  
 954 acids are Neu5Ac $\alpha$ 2,3 linked and the peptide sequence is R.LDGNNLTR.A. (D) The  
 955 phosphorylated high-Man glycopeptide, originated from carboxypeptidase in chicken  
 956 colon, with the K.YATNDTEVAHNNYLALK.E sequence. This glycan structure was also  
 957 detected in mallards (not tested in tufted ducks). Glycan symbols are according to the  
 958 SNFG format [80](#).

959

960

961

962

963

964

965

966

967

968

969

## Supplementary Materials

970

971

972

973 **Supplementary figures**

974

975

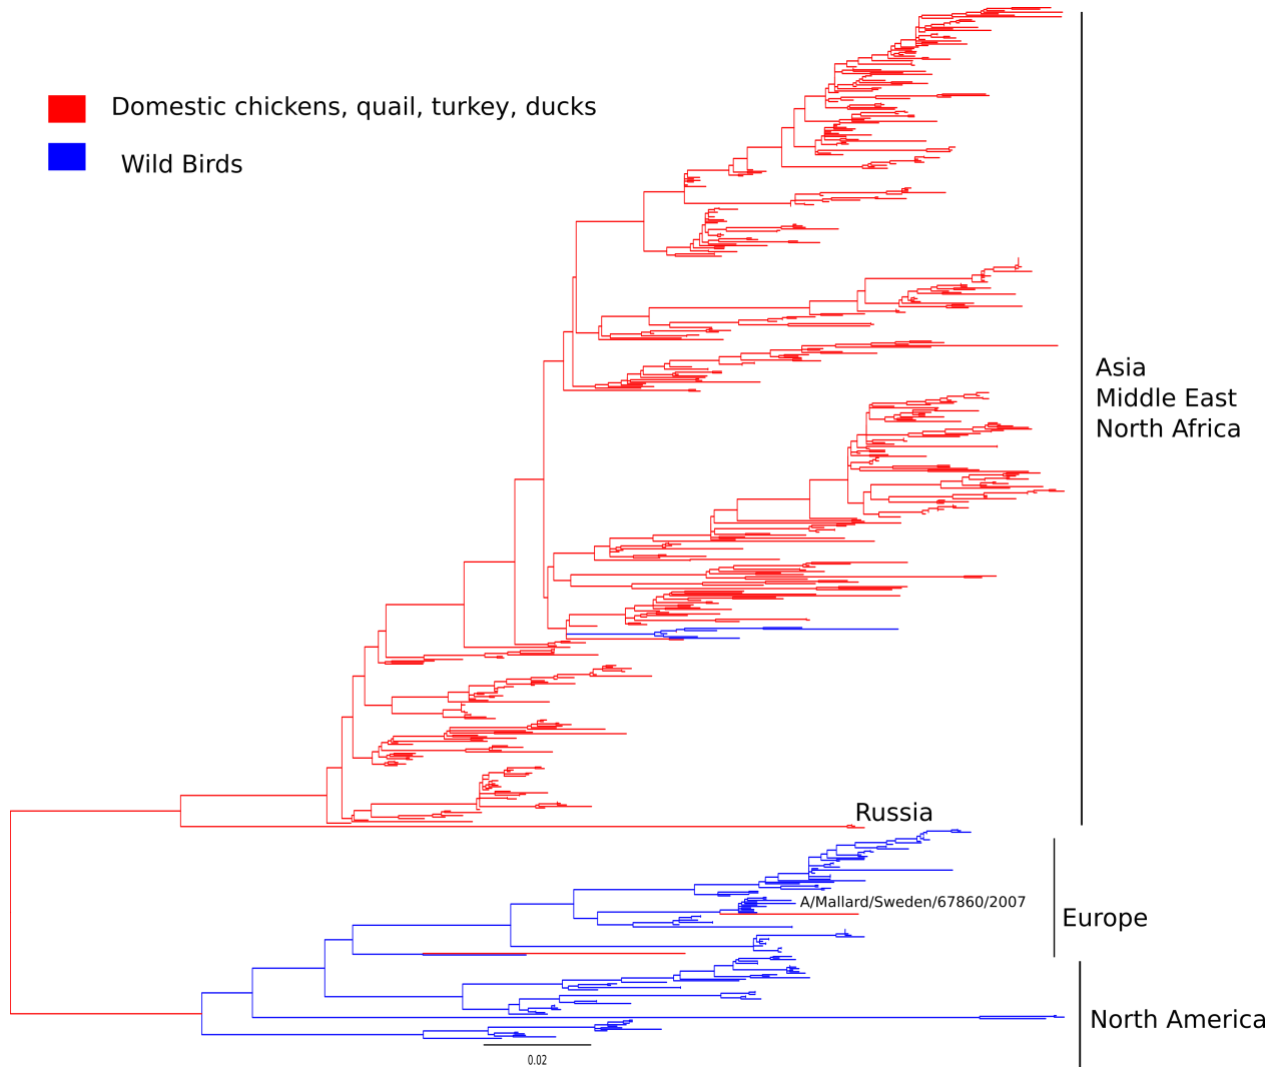

976

977 **Figure S1. LPAIV H9 Phylogeny.** Maximum likelihood tree of the HA gene segment of influenza  
978 A(H9N2) virus. Sequences obtained from domestic chickens, quail, turkeys, and ducks are  
979 coloured in red. Sequences obtained from wild birds are coloured in blue. Geographic location is  
980 provided to the right of the tree. Scale bar indicates number of nucleotide substitutions per site.  
981 Tree is midpoint rooted, reflecting the long branch length between the poultry-associated clade  
982 and those viruses from Europe and North America.

983

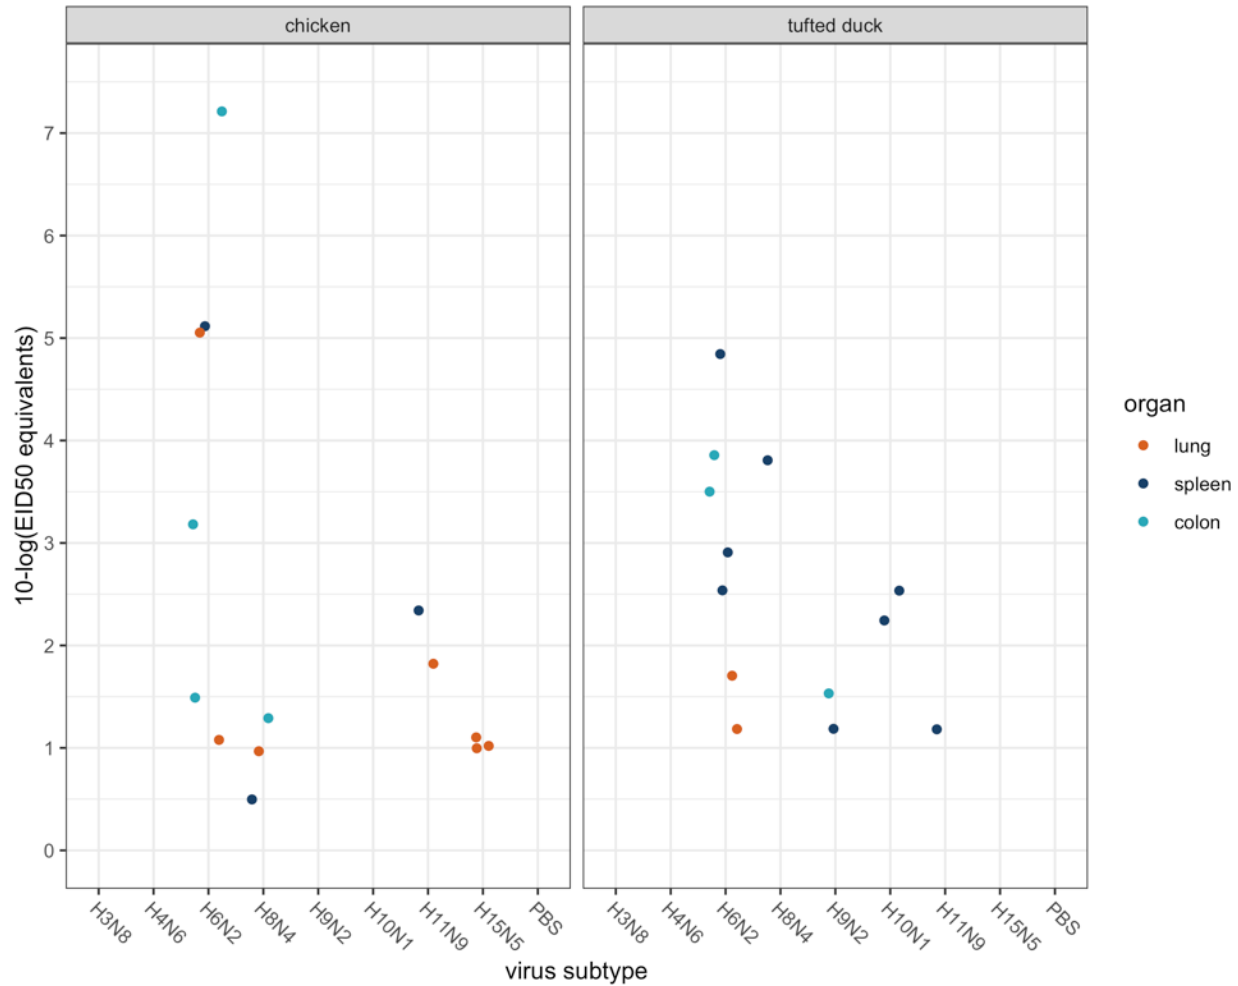

984

985 **Figure S2. Strain specific AIV positive organ samples.** Scatter plot of obtained positive organ  
986 samples at 3 days post infection from ON inoculated chickens and tufted ducks. Each point  
987 illustrates one positive sample from one individual. Four individuals were inoculated with each  
988 virus respectively. The points are coloured based on organ type; orange — lung, dark blue —  
989 spleen, and light blue — colon. Log<sub>10</sub> egg infectious dose 50 equivalents vs. inoculum.

990

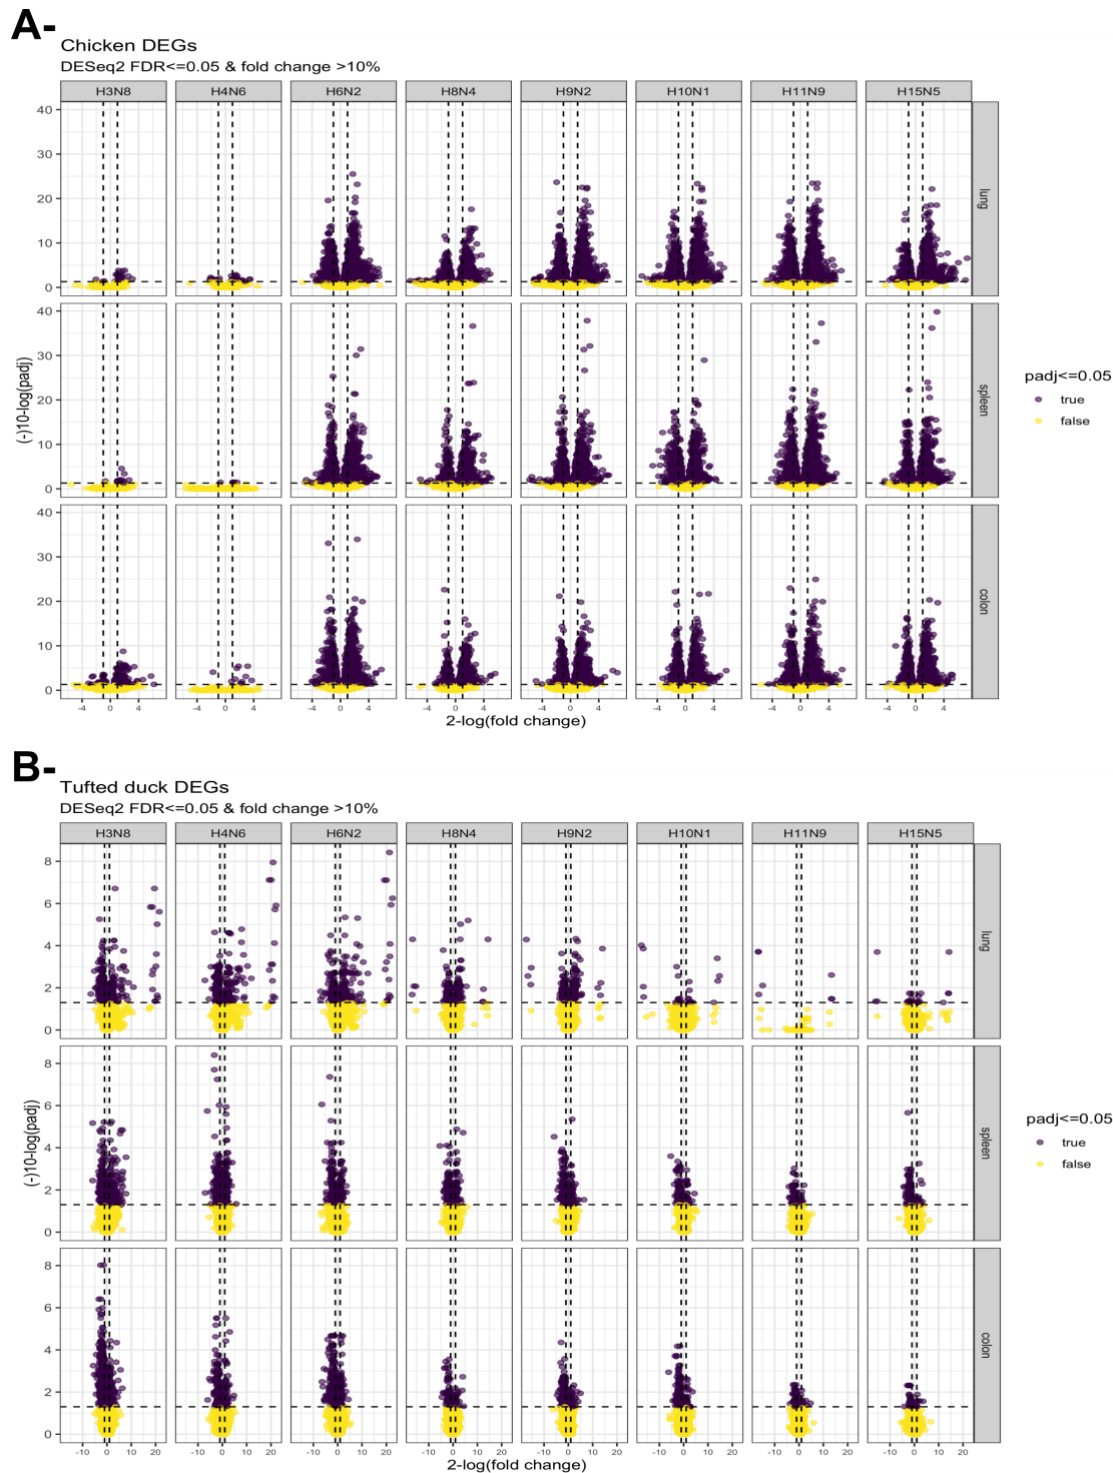

991  
992 **Figure S3. Volcano plots obtained from chickens (a) and tufted ducks (b) infection**  
993 **experiments.** Volcano plot showing DEGs for H3N8, H4N6, H6N2, H8N4, H9N2, H10N1, H11N9,  
994 and H15N5. The x-axis represents the log<sub>2</sub> values of the fold change observed for each mRNA  
995 transcript, and the y-axis represents the log<sub>10</sub> values of the adjusted p-values <=0.05.

996



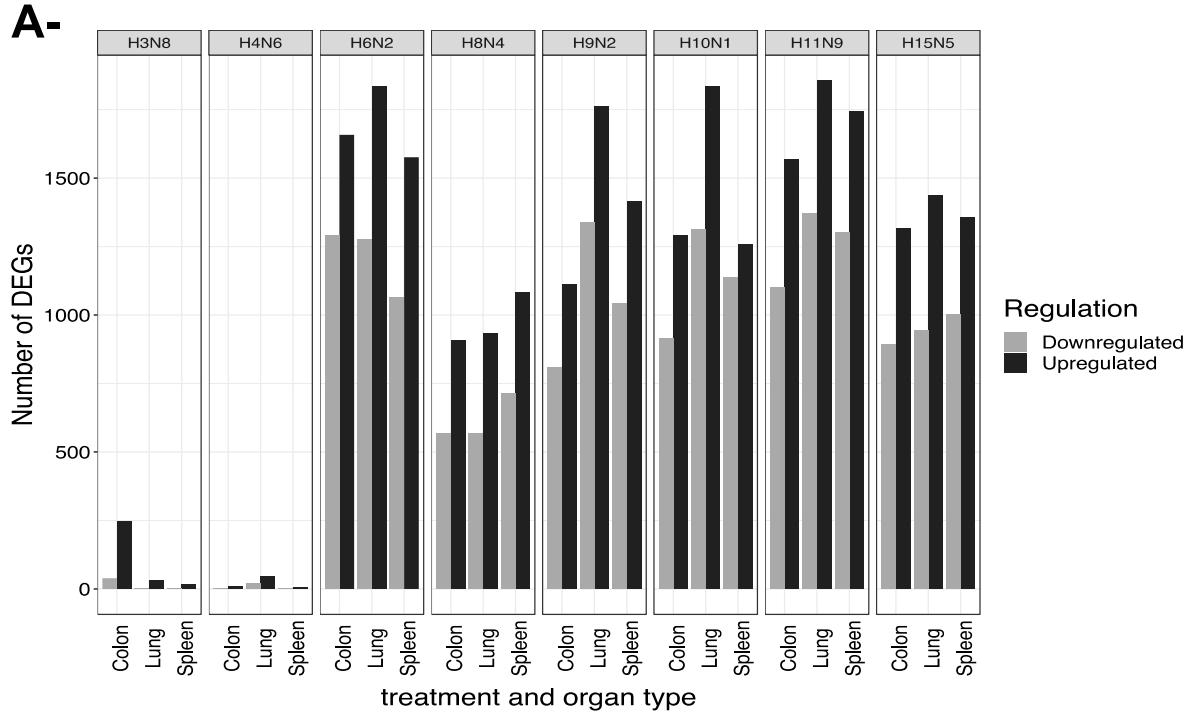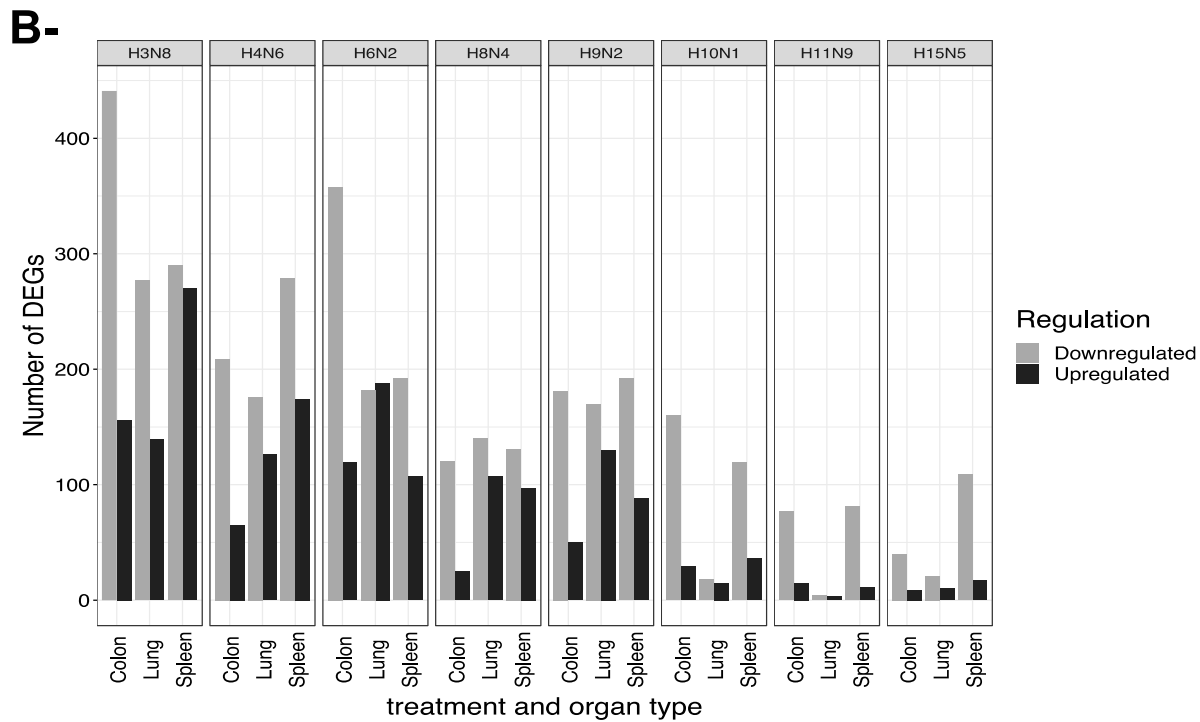

997  
 998  
 999 **Figure S4. Differentially expressed genes in infected chickens (a) and tufted ducks (b).**  
 1000 Number of differentially expressed genes (DEGs) in each tissue type for each virus subtype in  
 1001 chicken (a) and tufted ducks (b). Genes with an adjusted p-value (FDR) of  $\leq 0.05$  that were up- or  
 1002 down regulated at least 10% were considered differentially expressed.  
 1003

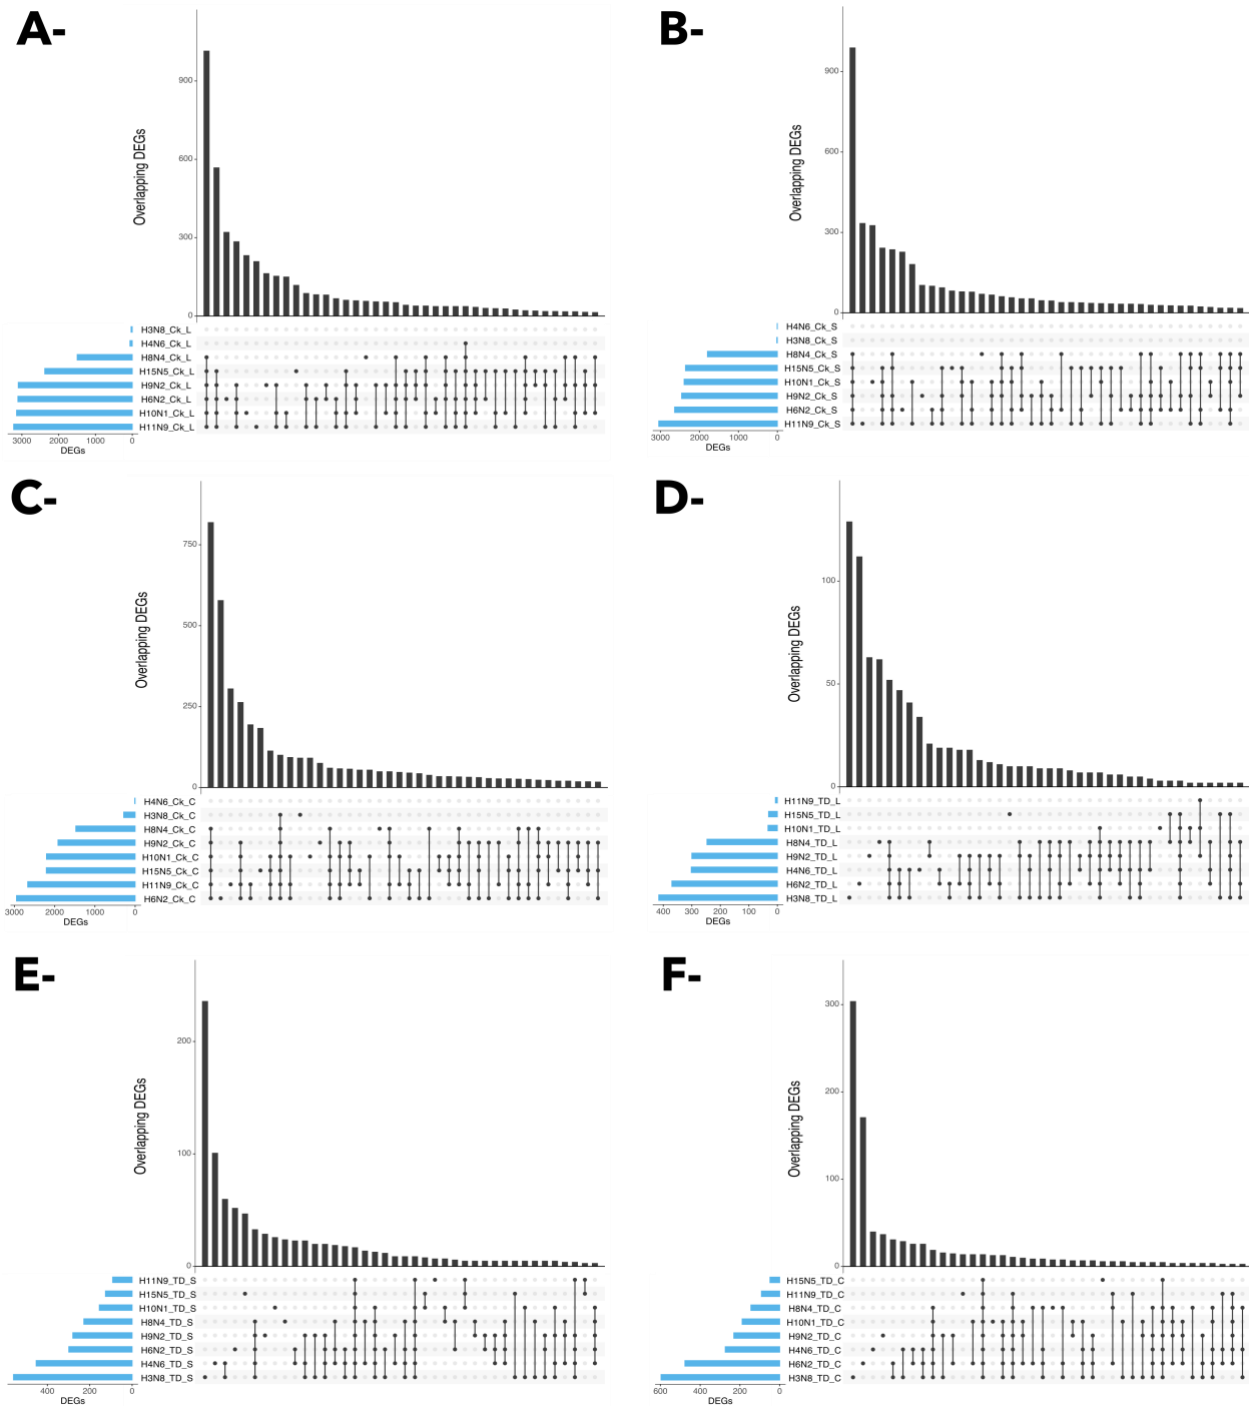

1004  
1005  
1006  
1007  
1008  
1009  
1010

**Figure S5. UpSet plot of the intersection of differentially expressed genes in chickens (a-c) and tufted ducks (d-e) tissues displayed for each virus subtype.** Ck = chickens, TD= tufted ducks, L = lung, S = spleen C = colon. The nature of a given intersection is indicated by the dots below the bar plot. For instance, the genes in the 9<sup>th</sup> column in A are differentially expressed in chicken lung following treatment with H10N1 and H11N9, whereas the genes in the 3<sup>rd</sup> column in A were differentially expressed in chicken lung in response to H6N2 only.

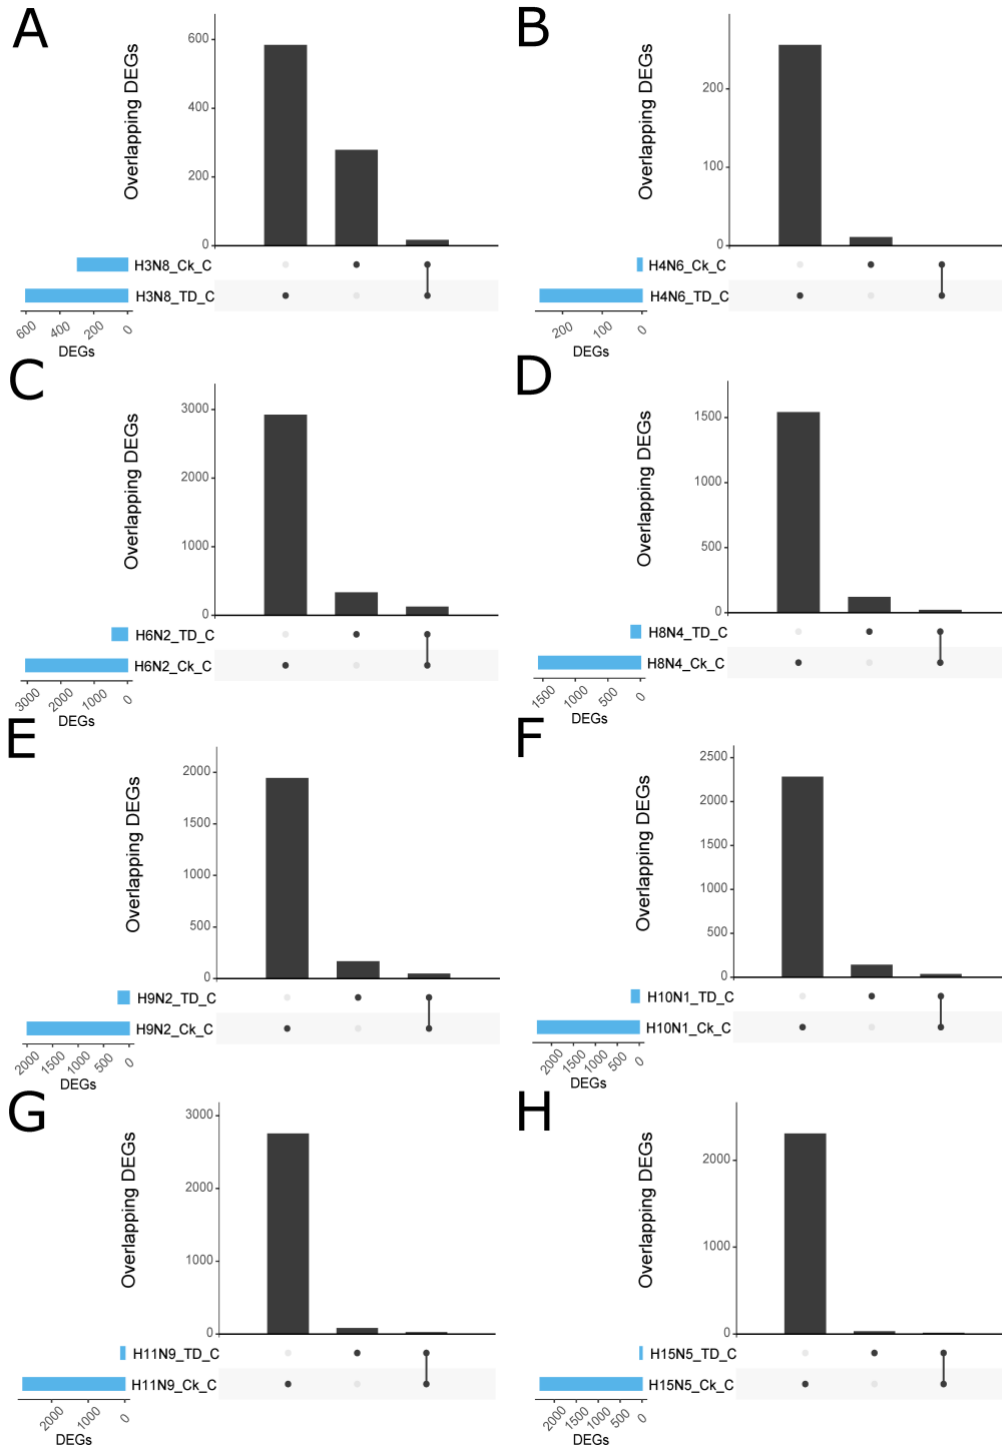

1011

1012 **Figure S6. UpSet plot of the intersection of differentially expressed orthologous genes in**  
 1013 **tufted duck and chicken colon tissue, displayed for each virus subtype. A) H3N8, B) H4N6,**  
 1014 **C) H6N2, D) H8N4, E) H9N2, F) H10N1, G) H11N9, and H) H15N5. Ck = chickens, TD= tufted**  
 1015 **ducks. The nature of a given intersection is indicated by the dots below the bar plot. For instance,**  
 1016 **the genes in the first column in A are differentially expressed in tufted duck (TD) but not in chicken**  
 1017 **(Ck). Orthologs represent reciprocal best blast hits between the two species.**

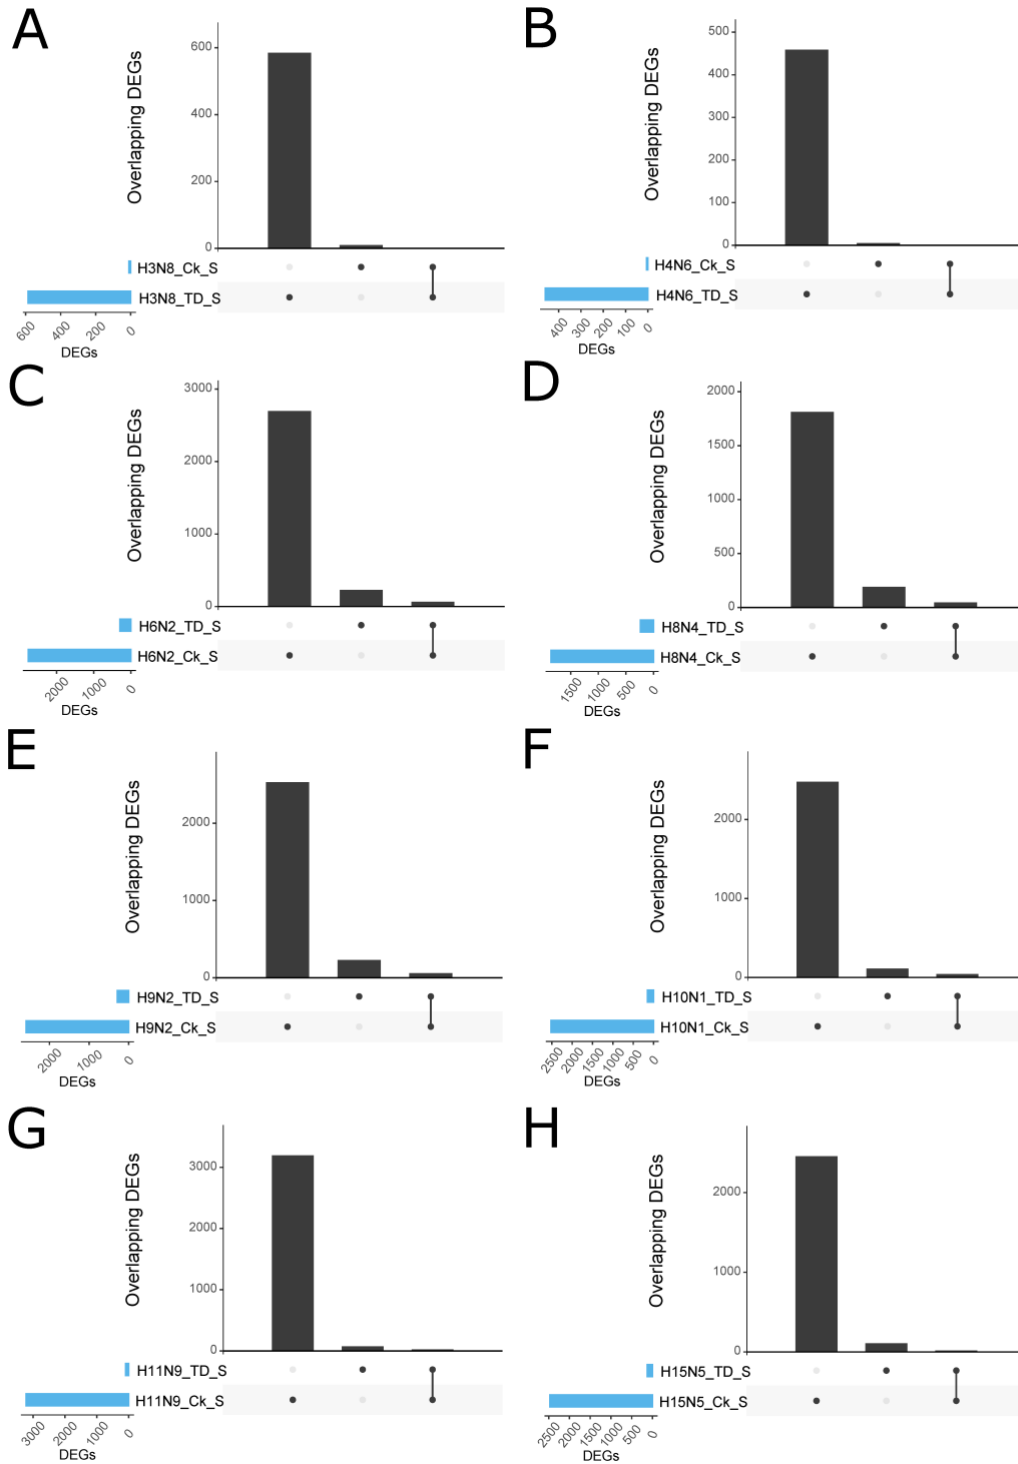

1018

1019 **Figure S7. UpSet plot of the intersection of differentially expressed orthologous genes in**  
 1020 **tufted duck and chicken spleen tissue, displayed for each virus subtype. A) H3N8, B) H4N6,**  
 1021 **C) H6N2, D) H8N4, E) H9N2, F) H10N1, G) H11N9, and H) H15N5. Ck = chickens, TD= tufted**  
 1022 **ducks. The nature of a given intersection is indicated by the dots below the bar plot. For instance,**  
 1023 **the genes in the first column in A are differentially expressed in tufted duck (TD) but not in chicken**  
 1024 **(Ck). Orthologs represent reciprocal best blast hits between the two species.**

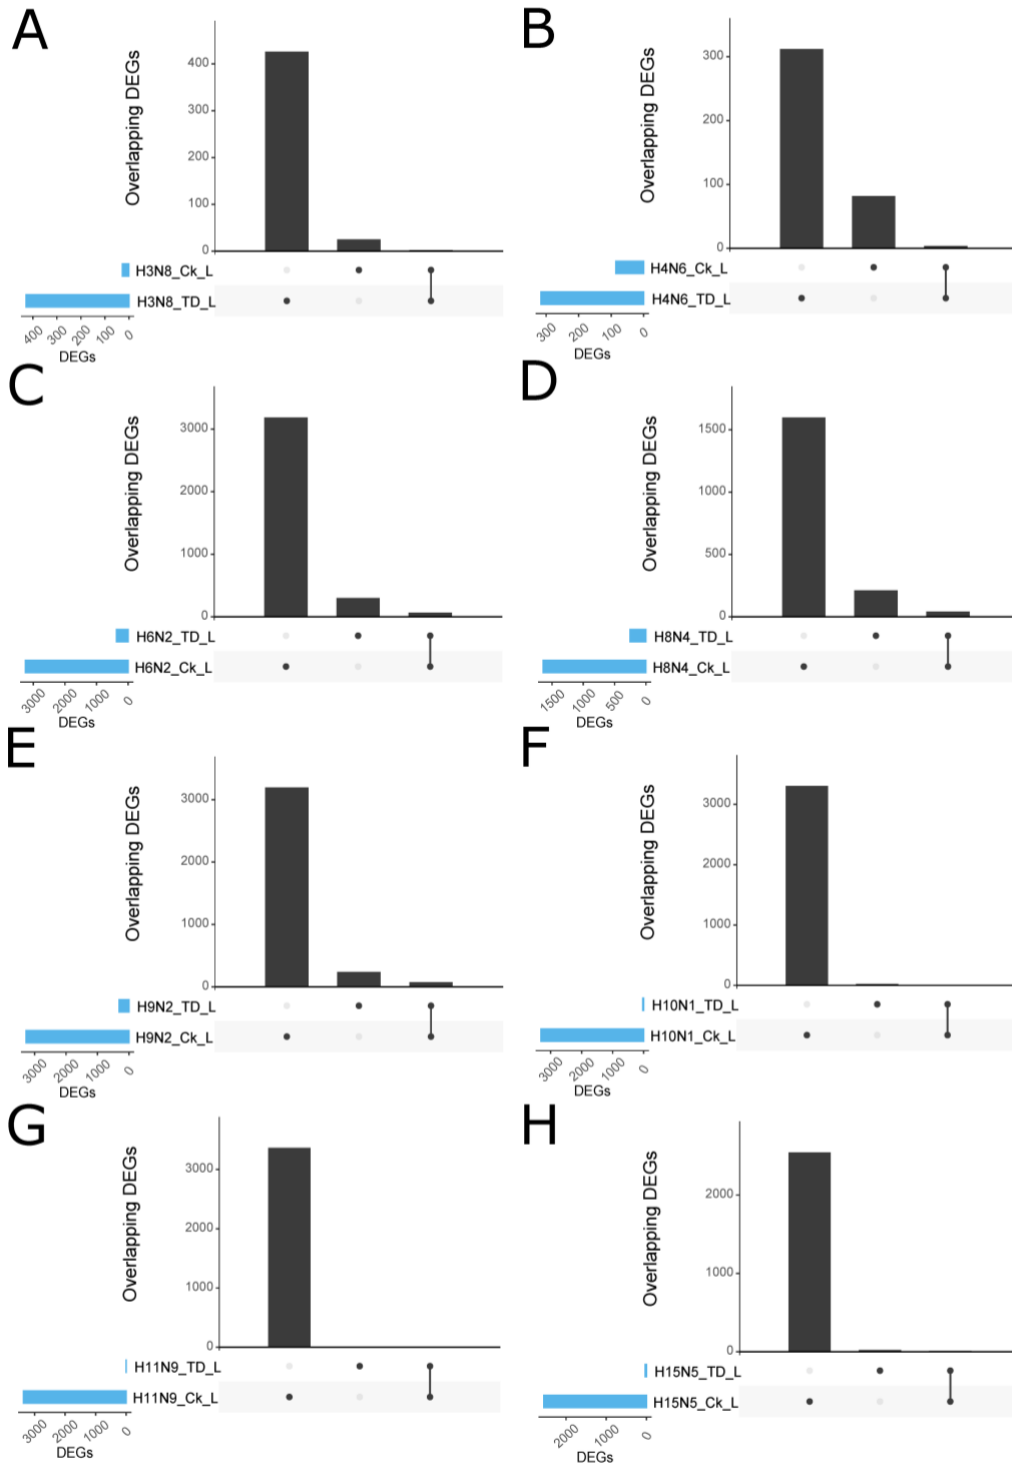

1025

1026 **Figure S8. UpSet plot of the intersection of differentially expressed orthologous genes in**  
 1027 **tufted duck and chicken lung tissue, displayed for each virus subtype. A) H3N8, B) H4N6,**  
 1028 **C) H6N2, D) H8N4, E) H9N2, F) H10N1, G) H11N9, and H) H15N5. Ck = chickens, TD= tufted**  
 1029 **ducks. The nature of a given intersection is indicated by the dots below the bar plot. For instance,**  
 1030 **the genes in the first column in A are differentially expressed in tufted duck (TD) but not in chicken**  
 1031 **(Ck). Orthologs represent reciprocal best blast hits between the two species.**

1032

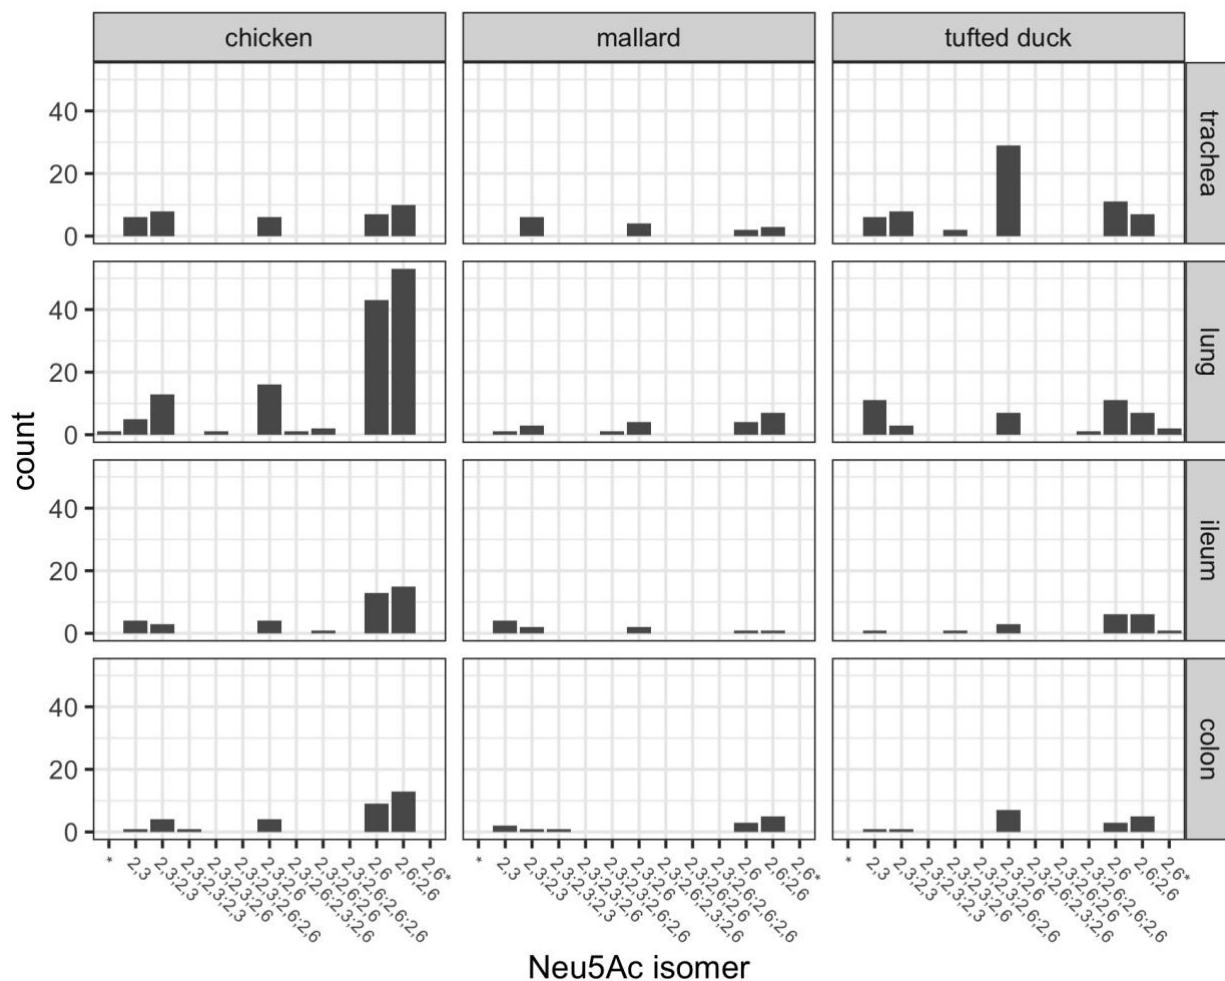

1033

1034 **Figure S9. Distribution of sialylated glycoforms in chicken, mallard, and tufted duck.** The  
 1035 figure illustrates the frequency of the different sialylated glycoforms (mono- to polysialylated  
 1036 glycoforms) identified in chicken, mallard, and tufted duck trachea, lung, ileum, and colon. 2,3  
 1037 indicates  $\alpha$ 2,3-linked Neu5Ac and 2,6 indicates  $\alpha$ 2,6-linked Neu5Ac. A separation with ; indicates  
 1038 that the glycan carries multiple Neu5Ac with different linkages. \* indicates undetermined.

1039

1040

1041

1042

1043

1044

1045

1046

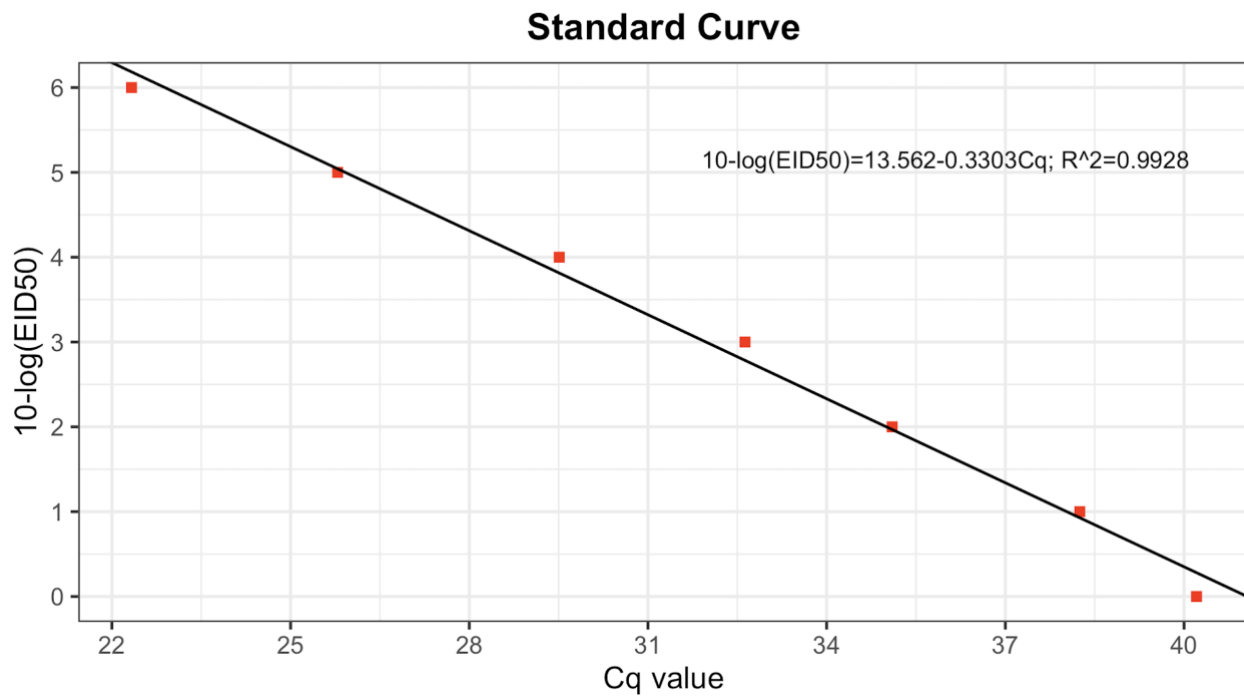

1047

1048 **Figure S10. Rt-qPCR standard curve for the titration of the inoculum.** Standard curve was  
1049 obtained from three 10-fold dilutions of the inoculum. Red squares showing the Cq  
1050 values. Correlation coefficient  $R^2$  (0.998)

1051

1052

1053

1054

1055

1056 **Supplementary tables**

1057 **Table S1.** Investigated virus isolates.

1058

| Subtype | Virus Designation            |
|---------|------------------------------|
| H3N8    | A/Mallard/Sweden/101487/2009 |
| H4N6    | A/Mallard/Sweden/80148/2008  |
| H6N2    | A/Mallard/Sweden/99825/2009  |
| H8N4    | A/Mallard/Sweden/58256/2006  |
| H9N2    | A/Mallard/Sweden/67860/2007  |
| H10N1   | A/Mallard/Sweden/102087/2009 |
| H11N9   | A/Mallard/Sweden/102103/2009 |
| H15N5   | A/Mallard/Sweden/139647/2012 |

1059

1060

1061

1062

1063



1064 **Table S2.** Variant detection after influenza A virus infection using virus inoculum as a  
1065 reference.

| Virus             | Sample ID          | Gene segment | Position | Change | Polymorphism type | Variant Frequency | Reference frequency | AA         |            |
|-------------------|--------------------|--------------|----------|--------|-------------------|-------------------|---------------------|------------|------------|
| H3                | Ck/H3/2OP 3d.p.i.  | PB2          | 47       | C -> A | SNP               | 85.6%             | 14.2%               | T 16 N     |            |
|                   |                    | NA           | 612      | T -> C | SNP               | 99.9%             | 0.01%               | Silent     |            |
|                   | Ck/H3/4OP 3d.p.i.  | PA           | 960      | C -> A | SNP               | 99.4%             | 0.6%                | Silent     |            |
| H6                | Ck/H6/colon        | PA           | 187      | G -> T | SNP               | 99.7%             | 0.03%               | V 63 L     |            |
|                   | Ck/H6/spleen       | PB2          | 252      | G -> A | SNP               | 42.2%             | 57.8%               | Silent     |            |
|                   |                    | PA           | 187      | G -> T | SNP               | 93.0%             | 7.0%                | V 63 L     |            |
|                   |                    | M            |          | 726    | G -> A            | SNP               | 83.1%               | 16.9%      | M2; S 13 N |
|                   |                    |              |          | 815    | C -> T            | SNP               | 84.9%               | 14.8%      | M2; L 43 F |
|                   |                    |              |          | 910    | A -> G            | SNP               | 79.8%               | 20.0%      | Silent     |
|                   |                    | 913          | G -> A   | SNP    | 79.8%             | 20.0%             | Silent              |            |            |
|                   | Ck/H6/lung         | PA           | 187      | G -> T | SNP               | 99.4%             | 0.06%               | V 63 L     |            |
|                   | Ck/ H6/3OP 3d.p.i. | PA           | 1404     | C -> T | SNP               | 99.8%             | 0.02%               | Silent     |            |
|                   |                    | HA           | 1300     | G -> A | SNP               | 100%              | 0%                  | D 434 N    |            |
|                   | TD/H6/colon        | PB2          | 1,753    | C -> G | SNP               | 85.7%             | 14.3%               | P 585 A    |            |
|                   |                    | PB1          | 84       | C -> T | SNP               | 92.9%             | 7.1%                | Silent     |            |
|                   |                    | M            |          | 726    | G -> A            | SNP               | 92.4%               | 7.6%       | M2; S 13 N |
|                   |                    |              |          | 767    | G -> A            | SNP               | 51.8%               | 48.2%      | M2; V 27 I |
|                   |                    |              |          | 815    | C -> T            | SNP               | 34.9%               | 64.3%      | M2; L 43 F |
|                   |                    |              |          | 910    | A -> G            | SNP               | 36.6%               | 63.4%      | Silent     |
|                   |                    |              |          | 913    | G -> A            | SNP               | 84.0%               | 16.0%      | Silent     |
|                   | TD/H6/ Spleen      | PB2          | 683      | A -> G | SNP               | 99.9%             | 0.03%               | Y 228 C    |            |
|                   |                    | NP           |          | 198    | G -> A            | SNP               | 99.8%               | 0.1%       | M 66 I     |
|                   |                    |              |          | 495    | T -> C            | SNP               | 99.9%               | 0.02%      | Silent     |
|                   |                    |              |          | 957    | T -> A            | SNP               | 99.7%               | 0.04%      | N 319 K    |
|                   |                    | M            |          | 726    | G -> A            | SNP               | 99.7%               | 0.3%       | M2; S 13 N |
|                   |                    |              |          | 763    | T -> C            | SNP               | 99.8%               | 0.03%      | Silent     |
|                   |                    |              | 815      | C -> T | SNP               | 99.6%             | 0.1%                | M2; L 43 F |            |
|                   |                    |              | 910      | A -> G | SNP               | 99.8%             | 0.02%               | Silent     |            |
|                   | 913                |              | G -> A   | SNP    | 98.3%             | 1.6%              | Silent              |            |            |
| TD/H6/ OP 3d.p.i. | HA                 | 374          | A -> G   | SNP    | 99.9%             | 0.01%             | E 125 G             |            |            |
|                   |                    | 547          | A -> C   | SNP    | 99.9%             | 0.01%             | N 183 H             |            |            |
| TD/H6/CL 3d.p.i.  | PA                 | 187          | G -> T   | SNP    | 99.8%             | 0.02%             | V 63 L              |            |            |
|                   | HA                 | 547          | A -> C   | SNP    | 99.9%             | 0.01%             | N 183 H             |            |            |
| H8                | TD/H8/Spleen       | PB1          | 1170     | G -> A | SNP               | 99.9%             | 0.01%               | Silent     |            |
|                   | TD/H8/3OP 3d.p.i.  | PB2          |          | 1402   | G -> A            | SNP               | 67.2%               | 32.7%      | A 468 T    |
|                   |                    |              |          | 1932   | G -> A            | SNP               | 67.0%               | 32.9%      | Silent     |
|                   |                    |              |          | 2153   | A -> G            | SNP               | 66.6%               | 33.3%      | K 718 R    |
|                   |                    | PB1          | 1915     | T -> C | SNP               | 68.5%             | 31.4%               | S 639 P    |            |
|                   |                    | PA           | 1997     | A -> G | SNP               | 58.7%             | 41.2%               | E 666 G    |            |
|                   | HA                 |              | 366      | C -> A | SNP               | 80.1%             | 19.8%               | F 122 L    |            |
|                   |                    | 997          | A -> G   | SNP    | 76.3%             | 23.3%             | I 333 V             |            |            |
| H9                | TD/H9/4OP 3d.p.i.  |              |          |        | None              |                   |                     |            |            |
| H10               | Ck/H10/2OP 3d.p.i. |              |          |        | None              |                   |                     |            |            |
|                   | TD/H10/3OP 3d.p.i. |              |          |        | None              |                   |                     |            |            |

1066

1067

**Table S3. Genes used for construction of heat map showing significant DEGs related to innate immunity (Figure 7)**

| Gene Name <sup>a</sup> | Lung |    |       |       |       |       |       |       | Spleen |    |    |       |       |       |       |       | Colon |      |      |       |       |       |       |       |       |
|------------------------|------|----|-------|-------|-------|-------|-------|-------|--------|----|----|-------|-------|-------|-------|-------|-------|------|------|-------|-------|-------|-------|-------|-------|
|                        | H3   | H4 | H6    | H8    | H9    | H10   | H11   | H15   | H3     | H4 | H6 | H8    | H9    | H10   | H11   | H15   | H3    | H4   | H6   | H8    | H9    | H10   | H11   | H15   |       |
| AvBD1                  | NA   | NA | NA    | NA    | NA    | NA    | NA    | NA    | NA     | NA | NA | NA    | NA    | NA    | NA    | NA    | NA    | NA   | NA   | NA    | NA    | NA    | NA    | NA    |       |
| AvBD4                  | NA   | NA | NA    | NA    | NA    | NA    | NA    | -3,41 | NA     | NA | NA | NA    | NA    | NA    | NA    | NA    | NA    | NA   | NA   | NA    | NA    | NA    | NA    | NA    |       |
| AvBD6                  | NA   | NA | NA    | NA    | NA    | NA    | NA    | NA    | NA     | NA | NA | NA    | NA    | NA    | -2,34 | NA    | NA    | NA   | NA   | NA    | NA    | NA    | NA    | NA    |       |
| DEFB4A                 | NA   | NA | -2,18 | NA    | NA    | NA    | NA    | NA    | NA     | NA | NA | -2,05 | NA    | -1,46 | -1,77 | -1,96 | -1,35 | NA   | NA   | NA    | NA    | NA    | NA    | NA    |       |
| IFIT5                  | NA   | NA | 2,11  | NA    | NA    | NA    | NA    | NA    | NA     | NA | NA | NA    | NA    | NA    | NA    | NA    | NA    | NA   | NA   | NA    | NA    | NA    | NA    | NA    |       |
| IL8                    | NA   | NA | NA    | NA    | NA    | NA    | NA    | NA    | NA     | NA | NA | NA    | NA    | NA    | -2,95 | NA    | NA    | NA   | 3,70 | NA    | NA    | 2,34  | NA    | NA    |       |
| IRF7                   | NA   | NA | NA    | -1,16 | -1,10 | -1,05 | NA    | NA    | NA     | NA | NA | NA    | NA    | NA    | NA    | NA    | NA    | NA   | NA   | NA    | NA    | NA    | NA    | NA    |       |
| LSM14A                 | NA   | NA | NA    | NA    | NA    | NA    | NA    | NA    | NA     | NA | NA | -0,48 | -0,64 | -0,53 | NA    | NA    | -0,59 | NA   | NA   | -0,56 | -0,53 | NA    | -0,48 | -0,52 | -0,54 |
| LSM14B                 | NA   | NA | NA    | NA    | NA    | NA    | NA    | NA    | NA     | NA | NA | NA    | NA    | NA    | NA    | NA    | NA    | NA   | NA   | NA    | NA    | NA    | NA    | 2,50  |       |
| MAVS                   | NA   | NA | -1,28 | NA    | -1,11 | -0,92 | -1,25 | -0,85 | NA     | NA | NA | -1,03 | -0,79 | -0,85 | NA    | -0,91 | -1,13 | NA   | NA   | -0,76 | -1,05 | -1,06 | -1,08 | -1,10 | -0,88 |
| OASL                   | NA   | NA | 2,33  | NA    | NA    | NA    | NA    | NA    | NA     | NA | NA | 3,37  | NA    | NA    | NA    | NA    | NA    | NA   | 1,80 | NA    | NA    | NA    | NA    | NA    |       |
| RSAD2                  | NA   | NA | 2,18  | NA    | NA    | NA    | NA    | NA    | NA     | NA | NA | 2,22  | NA    | NA    | NA    | NA    | NA    | NA   | NA   | NA    | NA    | NA    | NA    | NA    |       |
| TICAM1                 | NA   | NA | -2,04 | NA    | -2,01 | -1,98 | -2,08 | -1,69 | NA     | NA | NA | -1,42 | NA    | -1,16 | -2,60 | -1,72 | NA    | NA   | NA   | -2,12 | NA    | NA    | -0,97 | -1,22 | NA    |
| TLR3                   | NA   | NA | 1,21  | NA    | NA    | NA    | NA    | NA    | NA     | NA | NA | NA    | NA    | NA    | 1,52  | NA    | NA    | NA   | 1,88 | 1,45  | 1,61  | 1,50  | 1,46  | 1,43  |       |
| TRIM25                 | NA   | NA | 1,75  | NA    | 1,06  | 1,14  | 1,10  | NA    | NA     | NA | NA | 1,95  | NA    | 1,07  | 1,53  | 1,56  | 1,41  | 1,01 | NA   | 1,39  | 1,33  | 0,91  | 1,14  | 1,18  | 1,19  |
| CCL19                  | NA   | NA | NA    | NA    | NA    | NA    | NA    | NA    | NA     | NA | NA | NA    | NA    | NA    | NA    | NA    | NA    | NA   | NA   | NA    | NA    | NA    | NA    | NA    | NA    |
| CCL21                  | NA   | NA | NA    | NA    | NA    | NA    | NA    | NA    | NA     | NA | NA | NA    | NA    | NA    | NA    | NA    | NA    | NA   | NA   | NA    | NA    | NA    | NA    | NA    | NA    |
| DDX58                  | NA   | NA | NA    | NA    | NA    | NA    | NA    | NA    | NA     | NA | NA | NA    | NA    | NA    | NA    | NA    | NA    | NA   | NA   | NA    | NA    | NA    | NA    | NA    | NA    |
| EIF2AK2                | NA   | NA | NA    | NA    | NA    | NA    | NA    | NA    | NA     | NA | NA | NA    | NA    | NA    | NA    | NA    | NA    | NA   | NA   | NA    | NA    | NA    | NA    | NA    | NA    |
| IFITM3                 | NA   | NA | NA    | NA    | NA    | NA    | NA    | NA    | NA     | NA | NA | NA    | NA    | NA    | NA    | NA    | NA    | NA   | NA   | NA    | NA    | NA    | NA    | NA    | NA    |
| IFNA1                  | NA   | NA | NA    | NA    | NA    | NA    | NA    | NA    | NA     | NA | NA | NA    | NA    | NA    | NA    | NA    | NA    | NA   | NA   | NA    | NA    | NA    | NA    | NA    | NA    |
| IFNA2                  | NA   | NA | NA    | NA    | NA    | NA    | NA    | NA    | NA     | NA | NA | NA    | NA    | NA    | NA    | NA    | NA    | NA   | NA   | NA    | NA    | NA    | NA    | NA    | NA    |
| IFNA3                  | NA   | NA | NA    | NA    | NA    | NA    | NA    | NA    | NA     | NA | NA | NA    | NA    | NA    | NA    | NA    | NA    | NA   | NA   | NA    | NA    | NA    | NA    | NA    | NA    |
| IFNB                   | NA   | NA | NA    | NA    | NA    | NA    | NA    | NA    | NA     | NA | NA | NA    | NA    | NA    | NA    | NA    | NA    | NA   | NA   | NA    | NA    | NA    | NA    | NA    | NA    |
| IFNG                   | NA   | NA | NA    | NA    | NA    | NA    | NA    | NA    | NA     | NA | NA | NA    | NA    | NA    | NA    | NA    | NA    | NA   | NA   | NA    | NA    | NA    | NA    | NA    | NA    |
| IL1B                   | NA   | NA | NA    | NA    | NA    | NA    | NA    | NA    | NA     | NA | NA | NA    | NA    | NA    | NA    | NA    | NA    | NA   | NA   | NA    | NA    | NA    | NA    | NA    | NA    |
| IL6                    | NA   | NA | NA    | NA    | NA    | NA    | NA    | NA    | NA     | NA | NA | NA    | NA    | NA    | NA    | NA    | NA    | NA   | NA   | NA    | NA    | NA    | NA    | NA    | NA    |
| IRF3                   | NA   | NA | NA    | NA    | NA    | NA    | NA    | NA    | NA     | NA | NA | NA    | NA    | NA    | NA    | NA    | NA    | NA   | NA   | NA    | NA    | NA    | NA    | NA    | NA    |
| LGP2                   | NA   | NA | NA    | NA    | NA    | NA    | NA    | NA    | NA     | NA | NA | NA    | NA    | NA    | NA    | NA    | NA    | NA   | NA   | NA    | NA    | NA    | NA    | NA    | NA    |
| MDA5                   | NA   | NA | NA    | NA    | NA    | NA    | NA    | NA    | NA     | NA | NA | NA    | NA    | NA    | NA    | NA    | NA    | NA   | NA   | NA    | NA    | NA    | NA    | NA    | NA    |
| MX1                    | NA   | NA | NA    | NA    | NA    | NA    | NA    | NA    | NA     | NA | NA | NA    | NA    | NA    | NA    | NA    | NA    | NA   | NA   | NA    | NA    | NA    | NA    | NA    | NA    |
| NFKB1                  | NA   | NA | NA    | NA    | NA    | NA    | NA    | NA    | NA     | NA | NA | NA    | NA    | NA    | NA    | NA    | NA    | NA   | NA   | NA    | NA    | NA    | NA    | NA    | NA    |
| NFKB2                  | NA   | NA | NA    | NA    | NA    | NA    | NA    | NA    | NA     | NA | NA | NA    | NA    | NA    | NA    | NA    | NA    | NA   | NA   | NA    | NA    | NA    | NA    | NA    | NA    |
| NOS2                   | NA   | NA | NA    | NA    | NA    | NA    | NA    | NA    | NA     | NA | NA | NA    | NA    | NA    | NA    | NA    | NA    | NA   | NA   | NA    | NA    | NA    | NA    | NA    | NA    |
| STING1                 | NA   | NA | NA    | NA    | NA    | NA    | NA    | NA    | NA     | NA | NA | NA    | NA    | NA    | NA    | NA    | NA    | NA   | NA   | NA    | NA    | NA    | NA    | NA    | NA    |
| TLR7                   | NA   | NA | NA    | NA    | NA    | NA    | NA    | NA    | NA     | NA | NA | NA    | NA    | NA    | NA    | NA    | NA    | NA   | NA   | NA    | NA    | NA    | NA    | NA    | NA    |
| TNFA                   | NA   | NA | NA    | NA    | NA    | NA    | NA    | NA    | NA     | NA | NA | NA    | NA    | NA    | NA    | NA    | NA    | NA   | NA   | NA    | NA    | NA    | NA    | NA    | NA    |
| TRIM27.1               | NA   | NA | NA    | NA    | NA    | NA    | NA    | NA    | NA     | NA | NA | NA    | NA    | NA    | NA    | NA    | NA    | NA   | NA   | NA    | NA    | NA    | NA    | NA    | NA    |
| TRIM27.2               | NA   | NA | NA    | NA    | NA    | NA    | NA    | NA    | NA     | NA | NA | NA    | NA    | NA    | NA    | NA    | NA    | NA   | NA   | NA    | NA    | NA    | NA    | NA    | NA    |
| TRIM27-L               | NA   | NA | NA    | NA    | NA    | NA    | NA    | NA    | NA     | NA | NA | NA    | NA    | NA    | NA    | NA    | NA    | NA   | NA   | NA    | NA    | NA    | NA    | NA    | NA    |
| ZC3HAV1                | NA   | NA | NA    | NA    | NA    | NA    | NA    | NA    | NA     | NA | NA | NA    | NA    | NA    | NA    | NA    | NA    | NA   | NA   | NA    | NA    | NA    | NA    | NA    | NA    |

1069

1070

1071

1072

<sup>a</sup>Significantly differentially expressed genes (DEGs) were identified by filtering the DESeq2 output files for gene names identical to the genes listed in the table or gene descriptions including “defensin” or “gallinacin” (for  $\beta$ -defensins/gallinacins) using a threshold of  $\geq 10\%$  fold change relative to control birds and an adjusted p value  $< 0.05$ . NA indicates values below this threshold.

1073 **Table S4. Differentially expressed genes identified by filtering DESeq2 output files from infected chickens using**  
 1074 **search terms<sup>a</sup> related to glycosylation and transcription (Figure 8a)**

| Gene Name <sup>a</sup> | Lung |    |       |       |       |       |       |       | Spleen |    |       |       |       |       |       |       | Colon |    |       |       |       |       |       |       |
|------------------------|------|----|-------|-------|-------|-------|-------|-------|--------|----|-------|-------|-------|-------|-------|-------|-------|----|-------|-------|-------|-------|-------|-------|
|                        | H3   | H4 | H6    | H8    | H9    | H10   | H11   | H15   | H3     | H4 | H6    | H8    | H9    | H10   | H11   | H15   | H3    | H4 | H6    | H8    | H9    | H10   | H11   | H15   |
| ANP32B                 | NA   | NA | NA    | NA    | NA    | NA    | NA    | NA    | NA     | NA | NA    | NA    | -0,50 | NA    | NA    | NA    | NA    | NA | NA    | NA    | NA    | NA    | NA    | NA    |
| ANP32E                 | NA   | NA | -1,07 | -0,67 | -0,72 | -0,54 | -0,72 | -0,75 | NA     | NA | -0,71 | -0,59 | -0,62 | -0,63 | -0,63 | -0,61 | NA    | NA | -1,05 | -0,79 | -0,69 | -0,65 | -0,84 | -0,72 |
| ZC3H11B                | NA   | NA | NA    | NA    | 1,27  | 1,38  | 1,34  | NA    | NA     | NA | 0,70  | NA    | 0,67  | 1,04  | 0,87  | 0,69  | NA    | NA | 0,74  | NA    | 0,81  | 0,94  | 0,87  | 1,10  |
| FUT8                   | NA   | NA | 1,45  | 1,68  | 1,57  | 1,75  | 1,71  | 1,69  | NA     | NA | 2,10  | 1,89  | 1,86  | 1,71  | 1,99  | 1,93  | 1,04  | NA | 1,70  | 1,32  | 1,27  | 1,49  | 0,97  | 1,29  |
| FUT11                  | NA   | NA | -2,14 | NA    | -1,34 | NA    | NA    | NA    | NA     | NA | -1,87 | -1,59 | -1,64 | -1,24 | -1,56 | -1,56 | NA    | NA | -1,98 | NA    | NA    | NA    | -1,53 | NA    |
| GNPTAB                 | NA   | NA | NA    | 0,67  | 0,53  | 0,60  | 0,64  | 0,60  | NA     | NA | NA    | NA    | NA    | 0,57  | NA    | NA    | NA    | NA | NA    | NA    | NA    | NA    | NA    | NA    |
| ST3GAL2                | NA   | NA | NA    | NA    | NA    | NA    | NA    | NA    | NA     | NA | NA    | 0,71  | 0,68  | 0,92  | 0,69  | 0,80  | NA    | NA | NA    | NA    | NA    | 0,98  | NA    | NA    |
| ST3GAL4                | NA   | NA | 1,30  | 1,21  | 1,03  | 1,27  | 1,05  | 1,34  | NA     | NA | NA    | NA    | NA    | NA    | NA    | NA    | NA    | NA | NA    | NA    | NA    | NA    | NA    | NA    |
| ST3GAL5                | NA   | NA | NA    | NA    | NA    | NA    | NA    | NA    | NA     | NA | 2,34  | 2,54  | 2,51  | 2,51  | NA    | 2,80  | NA    | NA | NA    | NA    | NA    | NA    | NA    | NA    |
| ST3GAL6                | NA   | NA | -0,57 | NA    | -0,61 | -0,61 | -0,61 | -0,54 | NA     | NA | NA    | NA    | NA    | NA    | NA    | NA    | NA    | NA | NA    | NA    | NA    | NA    | NA    | NA    |
| ST6GAL1                | NA   | NA | -1,37 | NA    | -1,46 | -1,22 | -1,19 | -1,48 | NA     | NA | -1,03 | -0,74 | -0,92 | -0,87 | -0,99 | -1,01 | -0,78 | NA | -1,26 | -1,56 | -1,12 | -1,07 | -1,32 | -1,18 |
| ST6GAL2                | NA   | NA | NA    | NA    | 2,52  | NA    | 2,45  | NA    | NA     | NA | NA    | NA    | NA    | NA    | NA    | NA    | NA    | NA | NA    | NA    | NA    | NA    | NA    | NA    |

1075

1076 <sup>a</sup>Significantly differentially expressed genes (DEGs) were identified by filtering the DESeq2 output files for gene names  
 1077 including any of the search terms: “ANP32”, “ZC3H11”, “ST3GAL”, “ST6GAL”, “FUT”, “GNPT”, “NAGPA”, “MUC” or “CGT”  
 1078 using a threshold of  $\geq 10\%$  fold change relative to control birds and an adjusted p value  $<0.05$ . NA indicates values below  
 1079 this threshold.

1080

1081 **Table S5. Differentially expressed genes identified by filtering DESeq2 output files from infected tufted ducks using**  
 1082 **search terms<sup>a</sup> related to glycosylation and transcription (Figure 4b)**

| Gene Name <sup>a</sup> | Lung |    |      |       |      |     |     |     | Spleen |      |       |      |      |      |     |     | Colon |    |       |       |       |       |     |     |
|------------------------|------|----|------|-------|------|-----|-----|-----|--------|------|-------|------|------|------|-----|-----|-------|----|-------|-------|-------|-------|-----|-----|
|                        | H3   | H4 | H6   | H8    | H9   | H10 | H11 | H15 | H3     | H4   | H6    | H8   | H9   | H10  | H11 | H15 | H3    | H4 | H6    | H8    | H9    | H10   | H11 | H15 |
| ZC3H11A                | NA   | NA | NA   | NA    | NA   | NA  | NA  | NA  | NA     | NA   | NA    | NA   | NA   | NA   | NA  | NA  | NA    | NA | -1,42 | -1,10 | -1,13 | -1,12 | NA  | NA  |
| POFUT1                 | NA   | NA | NA   | -2,42 | NA   | NA  | NA  | NA  | NA     | NA   | NA    | NA   | NA   | NA   | NA  | NA  | NA    | NA | NA    | NA    | NA    | NA    | NA  | NA  |
| FUT4                   | NA   | NA | NA   | NA    | NA   | NA  | NA  | NA  | NA     | NA   | -1,42 | NA   | NA   | NA   | NA  | NA  | NA    | NA | NA    | NA    | NA    | NA    | NA  | NA  |
| FUT8                   | NA   | NA | NA   | NA    | NA   | NA  | NA  | NA  | NA     | 0,92 | NA    | 0,68 | NA   | NA   | NA  | NA  | NA    | NA | NA    | NA    | NA    | NA    | NA  | NA  |
| FUT10                  | NA   | NA | 1,72 | NA    | 1,62 | NA  | NA  | NA  | NA     | NA   | NA    | NA   | NA   | NA   | NA  | NA  | NA    | NA | NA    | NA    | NA    | NA    | NA  | NA  |
| ST3GAL2                | NA   | NA | NA   | NA    | NA   | NA  | NA  | NA  | NA     | NA   | NA    | NA   | NA   | NA   | NA  | NA  | -0,91 | NA | NA    | NA    | NA    | NA    | NA  | NA  |
| ST6GALNAC2             | NA   | NA | NA   | NA    | NA   | NA  | NA  | NA  | NA     | NA   | NA    | NA   | NA   | NA   | NA  | NA  | -1,73 | NA | NA    | NA    | NA    | NA    | NA  | NA  |
| ST6GALNAC4             | NA   | NA | NA   | NA    | NA   | NA  | NA  | NA  | NA     | NA   | NA    | NA   | NA   | NA   | NA  | NA  | -1,91 | NA | NA    | NA    | NA    | NA    | NA  | NA  |
| GNPTAB                 | NA   | NA | NA   | NA    | NA   | NA  | NA  | NA  | 0,94   | NA   | NA    | NA   | 0,96 | NA   | NA  | NA  | NA    | NA | NA    | NA    | NA    | NA    | NA  | NA  |
| MUC2                   | NA   | NA | NA   | NA    | 3,96 | NA  | NA  | NA  | 6,37   | NA   | NA    | NA   | NA   | 4,42 | NA  | NA  | NA    | NA | NA    | NA    | NA    | NA    | NA  | NA  |

1083  
 1084 <sup>a</sup>Significantly differentially expressed genes (DEGs) were identified by filtering the DESeq2 output files for gene names  
 1085 including any of the search terms: “ANP32”, “ZC3H11”, “ST3GAL”, “ST6GAL”, “FUT”, “GNPT”, “NAGPA”, “MUC” or “CGT”  
 1086 using a threshold of  $\geq 10\%$  fold change relative to control birds and an adjusted p value  $<0.05$ . NA indicates values below  
 1087 this threshold.

1088

1089

1090  
1091  
1092

**Table S6.** Annotated list of sialylated *N*- and *O*-linked glycans detected in mallard tissues. *m/z* — mass to charge ratio, *z* — charge, UID — Uniprot ID, and Ln/Nn — number of LacNAc/number of Neu5Ac ratio, 0.4–0.6 for Neu5Ac $\alpha$ 2,3 and 0.8–1.5 for Neu5Ac $\alpha$ 2,6 terminated glycopeptides.

| Sequence                   | Glycan                        | Glycan type | Observed <i>m/z</i> | <i>z</i> | Mass error (ppm) | Starting position | Protein Name                                         | UID    | Species | Tissue  | Neu5Ac linkage | Ln/Nn Ratio |
|----------------------------|-------------------------------|-------------|---------------------|----------|------------------|-------------------|------------------------------------------------------|--------|---------|---------|----------------|-------------|
| K.KGQNETIK.I               | HexNAc(4)Hex(5)Fuc(1)NeuAc(2) | N-glycan    | 1090.1182           | 3        | 1.4              | 444               | Integrin beta                                        | U3IPD4 | mallard | trachea | 2.3;2.3        | 0.46        |
| K.LHLNVTK.D                | HexNAc(4)Hex(5)NeuAc(1)       | N-glycan    | 913.3977            | 3        | 0.9              | 212               | Ig-like domain-containing protein (CD80)             | U3IG5  | mallard | colon   | 2.6;2.6        | MS3         |
| K.LVDGIDAPIANETIR.I        | HexNAc(4)Hex(5)NeuAc(2)       | N-glycan    | 1267.883            | 3        | 0.8              | 372               | Uncharacterized protein (alpha 2 macroglobulin)      | U3IGH7 | mallard | colon   | 2.6;2.6        | MS3         |
| K.LVDGSGAPIANETVR.I        | HexNAc(4)Hex(5)NeuAc(2)       | N-glycan    | 926.6451            | 4        | 0.0              | 376               | Uncharacterized protein (alpha 2 macroglobulin)      | U3I742 | mallard | lung    | 2.6;2.6        | 0.97        |
| K.LVDGSGAPIANETVR.I        | HexNAc(4)Hex(5)NeuAc(2)       | N-glycan    | 1235.1913           | 3        | 0.3              | 376               | Uncharacterized protein (alpha 2 macroglobulin)      | U3I742 | mallard | trachea | 2.6;2.6        | 0.99        |
| K.LVDGSGAPIANETVR.I        | HexNAc(4)Hex(5)NeuAc(1)       | N-glycan    | 1138.1599           | 3        | 0.7              | 376               | Uncharacterized protein (alpha 2 macroglobulin)      | U3I742 | mallard | trachea | 2.6            | MS3         |
| K.MGTDEDPSGSR.T            | HexNAc(4)Hex(5)NeuAc(2)       | N-glycan    | 1162.7643           | 3        | 1.4              | 1521              | Complement C3                                        | U3J6P0 | mallard | lung    | 2.6;2.6        | 0.97        |
| K.NTVSGIDAQLFDNVTSKPEEGK.N | HexNAc(4)Hex(5)NeuAc(2)       | N-glycan    | 1556.345            | 3        | 1.5              | 467               | Solute carrier family 15 member 1                    | U3I719 | mallard | ileum   | 2.3;2.6        | 0.67        |
| K.NTVSGIDAQLFDNVTSKPEEGK.N | HexNAc(3)Hex(5)NeuAc(1)       | N-glycan    | 1043.9659           | 4        | 0.7              | 467               | Solute carrier family 15 member 1                    | U3I719 | mallard | ileum   | 2.3            | MS3         |
| K.SDNNGTYTCEVK.S           | HexNAc(5)Hex(4)NeuAc(1)       | N-glycan    | 1073.0735           | 3        | -0.1             | 187               | Transmembrane and immunoglobulin domain containing 1 | U3IRQ4 | mallard | lung    | 2.3            | MS3         |
| K.TNNTCLSTEDACLQMR.F       | HexNAc(4)Hex(5)Fuc(1)NeuAc(2) | N-glycan    | 1061.4024           | 4        | 2.3              | 39                | CD59 molecule (CD59 blood group)                     | U3IGH4 | mallard | trachea | 2.3;2.6        | 0.7         |
| K.TNNTCLSTEDACLQMR.F       | HexNAc(4)Hex(5)Fuc(1)NeuAc(2) | N-glycan    | 1420.1981           | 3        | 1.6              | 39                | CD59 molecule (CD59 blood group)                     | U3IGH4 | mallard | lung    | 2.6;2.6        | 0.94        |
| K.TNNTCLSTEDACLQMR.F       | HexNAc(5)Hex(5)Fuc(1)NeuAc(2) | N-glycan    | 1112.1703           | 4        | 0.5              | 39                | CD59 molecule (CD59 blood group)                     | U3IGH4 | mallard | colon   | 2.6;2.6        | MS3         |
| K.VECNVTYGLICK.N           | HexNAc(5)Hex(5)Fuc(1)NeuAc(2) | N-glycan    | 1329.8538           | 3        | 1.9              | 1359              | Uncharacterized protein (Mucin 2)                    | U3IKI8 | mallard | lung    | 2.3;2.6        | MS3         |
| K.VNCSEGQPMSTLLR.R         | HexNAc(5)Hex(4)NeuAc(2)       | N-glycan    | 1276.18             | 3        | 0.9              | 367               | Kininogen 1                                          | U3IFX9 | mallard | colon   | 2.6            | MS3         |
| K.VNGTYAHLSPK.H            | HexNAc(5)Hex(4)Fuc(2)NeuAc(1) | N-glycan    | 1145.1525           | 3        | 0.6              | 720               | Cadherin 17                                          | U3J5I2 | mallard | colon   | 2.3            | MS3         |
| K.VVKSDNGTYTCEVK.S         | HexNAc(5)Hex(6)Fuc(1)NeuAc(2) | N-glycan    | 1076.9252           | 4        | -4.2             | 184               | Transmembrane and immunoglobulin domain containing 1 | U3IRQ4 | mallard | ileum   | 2.3;2.3        | MS3         |
| R.ENSLFDGNYSSVGNK.E        | HexNAc(6)Hex(7)NeuAc(3)       | N-glycan    | 1243.2448           | 4        | 1.3              | 350               | Aminopeptidase                                       | U3ID57 | mallard | colon   | 2.3;2.3 ; 2.3  | MS3         |
| R.HVKPGNISYYK.D            | HexNAc(5)Hex(4)NeuAc(2)       | N-glycan    | 1184.5052           | 3        | 2.0              | 157               | Apolipoprotein H                                     | U3IRY3 | mallard | trachea | 2.6;2.6        | 0.91        |
| R.ILQQVTNATGK.A            | HexNAc(4)Hex(5)NeuAc(2)       | N-glycan    | 1126.4848           | 3        | 1.2              | 70                | Fibrinogen gamma chain                               | U3IA23 | mallard | lung    | 2.6;2.6        | 1.17        |
| R.ILQQVTNATGK.A            | HexNAc(5)Hex(4)NeuAc(2)       | N-glycan    | 1140.1593           | 3        | 0.3              | 70                | Fibrinogen gamma chain                               | U3IA23 | mallard | colon   | 2.6            | MS3         |
| R.ITSNATSDLNLIK.V          | HexNAc(4)Hex(5)NeuAc(2)       | N-glycan    | 1161.1561           | 3        | 2.0              | 210               | Sarcoglycan beta                                     | U3I6K4 | mallard | trachea | 2.3;2.3        | 0.45        |
| R.IVDVNLTSSEK.V            | HexNAc(4)Hex(5)NeuAc(1)       | N-glycan    | 1030.1071           | 3        | -0.5             | 137               | Transmembrane 9 superfamily member                   | U3ISZ6 | mallard | colon   | 2.3            | MS3         |
| R.IVDVNLTSSEK.V            | HexNAc(4)Hex(5)NeuAc(1)       | N-glycan    | 1030.1089           | 3        | 1.2              | 137               | Transmembrane 9 superfamily member                   | U3ISZ6 | mallard | ileum   | 2.3            | MS3         |
| R.IVDVNLTSSEK.V            | HexNAc(4)Hex(5)NeuAc(2)       | N-glycan    | 1127.1416           | 3        | 1.9              | 137               | Transmembrane 9 superfamily member                   | U3ISZ6 | mallard | trachea | 2.3;2.3        | MS3         |
| R.LDGNLTR.A                | HexNAc(5)Hex(5)Fuc(1)NeuAc(2) | N-glycan    | 1152.798            | 3        | 0.2              | 317               | Lumican                                              | U3J2R5 | mallard | trachea | 2.3;2.3        | MS3         |
| R.LNVSIDNEVVQLEK.A         | HexNAc(5)Hex(5)Fuc(1)NeuAc(2) | N-glycan    | 1039.453            | 4        | 4.4              | 230               | Epithelial cell adhesion molecule                    | U3J672 | mallard | colon   | 2.3;2.3        | MS3         |

|                            |                               |          |           |   |      |      |                                                                  |        |         |         |                     |      |
|----------------------------|-------------------------------|----------|-----------|---|------|------|------------------------------------------------------------------|--------|---------|---------|---------------------|------|
| R.LNVSIDNEVVQLEK.A         | HexNAc(5)Hex(5)Fuc(1)NeuAc(2) | N-glycan | 1039.4532 | 4 | 4.6  | 230  | Epithelial cell adhesion molecule                                | U3J672 | mallard | ileum   | 2.3;2.3             | MS3  |
| R.LNVSIDNEVVQLEK.A         | HexNAc(5)Hex(6)Fuc(2)NeuAc(2) | N-glycan | 1116.2299 | 4 | 4.2  | 230  | Epithelial cell adhesion molecule                                | U3J672 | mallard | lung    | 2.3;2.3             | MS3  |
| R.NISIQQEK.F               | HexNAc(4)Hex(5)Fuc(1)NeuAc(2) | N-glycan | 1104.1215 | 3 | 1.2  | 630  | Leucyl and cystinyl aminopeptidase                               | U3J380 | mallard | trachea | 2.3;2.3             | 0.5  |
| R.NQTIK.F                  | HexNAc(5)Hex(4)Fuc(1)NeuAc(1) | N-glycan | 902.042   | 3 | 1.4  | 118  | Tetraspanin                                                      | R0KL21 | mallard | lung    | 2.3;2.3             | MS3  |
| R.NSTVEVWVK.R              | HexNAc(5)Hex(5)Fuc(1)NeuAc(1) | N-glycan | 1104.7783 | 3 | 0.3  | 1303 | P-type domain-containing protein                                 | U3I472 | mallard | ileum   | 2.3                 | MS3  |
| R.NVSNMVIDVK.M             | HexNAc(4)Hex(5)NeuAc(2)       | N-glycan | 1146.8137 | 3 | 1.0  | 1389 | Uncharacterized protein (alpha 2 macroglobulin)                  | U3I742 | mallard | trachea | 2.6;2.6             | 1.09 |
| R.NVSNMVIDVK.M             | HexNAc(4)Hex(5)NeuAc(2)       | N-glycan | 1146.8144 | 3 | 1.6  | 1389 | Uncharacterized protein (alpha 2 macroglobulin)                  | U3I742 | mallard | lung    | 2.6;2.6             | 1.17 |
| R.NVSNMVIDVK.M             | HexNAc(4)Hex(5)NeuAc(2)       | N-glycan | 1141.4809 | 3 | -0.1 | 1389 | Uncharacterized protein (alpha 2 macroglobulin)                  | U3I742 | mallard | ileum   | 2.6;2.6             | 1.69 |
| R.NVSNMVIDVK.M             | HexNAc(4)Hex(5)NeuAc(2)       | N-glycan | 1141.4817 | 3 | 0.7  | 1389 | Uncharacterized protein (alpha 2 macroglobulin)                  | U3I742 | mallard | colon   | 2.6;2.6             | MS3  |
| R.NVSNMVIDVK.M             | HexNAc(4)Hex(5)NeuAc(2)       | N-glycan | 1146.8134 | 3 | 0.7  | 1389 | Uncharacterized protein (alpha 2 macroglobulin)                  | U3I742 | mallard | lung    | 2.6;2.6             | MS3  |
| R.NVTVNILNEK.T             | HexNAc(4)Hex(5)NeuAc(2)       | N-glycan | 1116.8096 | 3 | 1.5  | 55   | Sarcoglycan delta                                                | U3IA81 | mallard | trachea | 2.3;2.3             | 0.54 |
| R.TAGWNIPMGLIHNK.T         | HexNAc(4)Hex(5)NeuAc(2)       | N-glycan | 939.9012  | 4 | 0.2  | 469  | Ovotransferrin                                                   | U3J851 | mallard | colon   | 2.6;2.6             | MS3  |
| R.TAGWNIPMGLIHNK.T         | HexNAc(4)Hex(5)NeuAc(2)       | N-glycan | 1252.869  | 3 | 2.6  | 469  | Ovotransferrin                                                   | U3J851 | mallard | lung    | 2.6;2.6             | MS3  |
| R.VENMSMR.L                | HexNAc(5)Hex(4)Fuc(2)NeuAc(1) | N-glycan | 1038.4073 | 3 | 0.6  | 1200 | Transient receptor potential cation channel subfamily M member 1 | U3ID69 | mallard | ileum   | 2.3                 | MS3  |
| R.VENMSMR.L                | HexNAc(5)Hex(6)Fuc(1)NeuAc(2) | N-glycan | 1194.7892 | 3 | 1.3  | 1200 | Transient receptor potential cation channel subfamily M member 1 | U3ID69 | mallard | lung    | 2.3;2.3 and 2.6;2.6 | MS3  |
| K.APVTRQTKVPGER.H          | HexNAc(1)Hex(1)NeuAc(2)       | O-glycan | 762.3679  | 3 | 0.6  | 83   | Polypeptide N-acetylgalactosaminyltransferase                    | U3J257 | mallard | lung    | 2.3;2.6             | 0.47 |
| K.EIESLAPDLVFTSPSPAGVK.R   | HexNAc(1)Hex(1)NeuAc(2)       | O-glycan | 1002.1405 | 3 | 1.3  | 1218 | Collagen type VI alpha 3 chain                                   | U3ID88 | mallard | trachea | 2.3;2.6             | MS3  |
| K.IQASKDTEVNPNSDDQAISK.T   | HexNAc(1)Hex(1)NeuAc(2)       | O-glycan | 1036.4617 | 3 | 1.9  | 167  | Cancer susceptibility 4                                          | U3IJL7 | mallard | ileum   | 2.3;2.6             | 1.6  |
| K.MPAQTKSPEEIDKEERPEVDTK.K | HexNAc(1)Hex(1)NeuAc(1)       | O-glycan | 808.1232  | 4 | 1.1  | 99   | Syndecan                                                         | U3IZZ0 | mallard | lung    | 2.6                 | 1.1  |
| R.ETAPTLRPVAPPISGTGYQPR.P  | HexNAc(1)Hex(1)NeuAc(1)       | O-glycan | 955.4749  | 3 | 1.9  | 12   | Fibrinogen beta chain                                            | U3I9E6 | mallard | lung    | 2.6                 | 0.8  |
| R.ETAPTLRPVAPPISGTGYQPR.P  | HexNAc(1)Hex(1)NeuAc(1)       | O-glycan | 955.4755  | 3 | 2.5  | 12   | Fibrinogen beta chain                                            | U3I9E6 | mallard | trachea | 2.6                 | 1    |
| R.ETAPTLRPVAPPISGTGYQPR.P  | HexNAc(1)Hex(1)NeuAc(1)       | O-glycan | 955.4749  | 3 | 1.9  | 12   | Fibrinogen beta chain                                            | U3I9E6 | mallard | ileum   | 2.6                 | 1.1  |
| R.ETAPTLRPVAPPISGTGYQPR.P  | HexNAc(1)Hex(1)NeuAc(1)       | O-glycan | 955.4745  | 3 | 1.5  | 12   | Fibrinogen beta chain                                            | U3I9E6 | mallard | colon   | 2.6                 | 1.3  |
| R.KVPVPTAVGSTSSLPAPDGEK.T  | HexNAc(1)Hex(1)NeuAc(1)       | O-glycan | 897.7728  | 3 | 2.1  | 336  | Fetuin B                                                         | U3IFE7 | mallard | lung    | 2.6                 | 1    |
| R.RPVPTTATPLRPGSR.R        | HexNAc(2)Hex(2)NeuAc(2)       | O-glycan | 730.3507  | 4 | 2.5  | 2102 | Fibronectin 1                                                    | U3IZ83 | mallard | lung    | 2.3;2.3             | 0.5  |
| R.SVSTARPSTGK.R            | HexNAc(1)Hex(1)NeuAc(2)       | O-glycan | 679.9768  | 3 | 3.8  | 139  | Cochlin                                                          | U3J879 | mallard | trachea | 2.3;2.6             | 0.46 |
| R.VISEATPTLAAGKDPEK.S      | 2*HexNAc(1)Hex(1)NeuAc(2)     | O-glycan | 1207.8607 | 3 | -0.2 | 731  | Dystroglycan 1                                                   | U3IBQ2 | mallard | trachea | 2.3;2.6             | 0.48 |
| R.VISEATPTLAAGKDPEK.S      | 2*HexNAc(1)Hex(1)NeuAc(2)     | O-glycan | 1207.8615 | 3 | 0.5  | 731  | Dystroglycan 1                                                   | U3IBQ2 | mallard | lung    | 2.3;2.6             | 0.7  |
| R.VNDTLR.K                 | HexNAc(1)Hex(1)NeuAc(2)       | O-glycan | 832.8605  | 2 | 1.0  | 2030 | Laminin subunit alpha 1                                          | U3ISC0 | mallard | lung    | 2.3;2.6             | 0.48 |
| R.VTTTAPVQACEPER.G         | HexNAc(1)Hex(1)NeuAc(1)       | O-glycan | 735.3218  | 3 | 1.8  | 198  | Prothrombin                                                      | U3J210 | mallard | lung    | 2.6                 | 0.8  |

1094 **Table S7.** Annotated list of sialylated *N*- and *O*-linked glycans detected in sampled tufted duck tissues. *m/z* — mass to  
1095 charge ratio, *z* — charge, UID — Uniprot ID, and Ln/Nn — number of LacNAc/number of Neu5Ac ratio, 0.4–0.6 for  
1096 Neu5Acα2,3 and 0.8–1.5 for Neu5Acα2,6 terminated glycopeptides. ND= not determined. Disialo core 1 glycopeptides were  
1097 assumed to be 2,3;2,6. \* One NeuAc is on Gal and the second is on GalNAc.

| Sequence              | Glycan                        | Glycan type | Observed m/z | z | Mass error (ppm) | Starting position | Protein Name                          | UID    | Species     | Tissue  | Neu5Ac isomer       | Ln/Nn |
|-----------------------|-------------------------------|-------------|--------------|---|------------------|-------------------|---------------------------------------|--------|-------------|---------|---------------------|-------|
| R.LNESNTCK.Q          | HexNAc(4)Hex(5)Fuc(1)NeuAc(2) | N-glycan    | 1102,416     | 3 | 0,7              | 58                | Uncharacterized protein               | U3I0T7 | tufted duck | lung    | 2,3;2,6/<br>2,6;2,6 | 0,79  |
| R.ILQQVTNATGK.A       | HexNAc(4)Hex(5)NeuAc(1)       | N-glycan    | 1029,453     | 3 | 1,1              | 70                | Fibrinogen gamma chain                | U3IA23 | tufted duck | ileum   | 2,6                 | MS3   |
| R.ILQQVTNATGK.A       | HexNAc(4)Hex(5)NeuAc(1)       | N-glycan    | 1029,452     | 3 | 0,8              | 70                | Fibrinogen gamma chain                | U3IA23 | tufted duck | trachea | 2,6                 | MS3   |
| R.ILQQVTNATGK.A       | HexNAc(4)Hex(5)NeuAc(1)       | N-glycan    | 1029,453     | 3 | 1,1              | 70                | Fibrinogen gamma chain                | U3IA23 | tufted duck | lung    | 2,6                 | MS3   |
| R.ILQQVTNATGK.A       | HexNAc(5)Hex(4)NeuAc(2)       | N-glycan    | 1140,160     | 3 | 0,7              | 70                | Fibrinogen gamma chain                | U3IA23 | tufted duck | lung    | 2,6*                | MS3   |
| R.ILQQVTNATGK.A       | HexNAc(4)Hex(5)NeuAc(2)       | N-glycan    | 1126,484     | 3 | 0,3              | 70                | Fibrinogen gamma chain                | U3IA23 | tufted duck | ileum   | 2,6;2,6             | 1,32  |
| R.ILQQVTNATGK.A       | HexNAc(4)Hex(5)NeuAc(2)       | N-glycan    | 1126,485     | 3 | 1,0              | 70                | Fibrinogen gamma chain                | U3IA23 | tufted duck | colon   | 2,6;2,6             | 1,91  |
| K.VLKDNNGTEDEIR.S     | HexNAc(3)Hex(4)Fuc(1)NeuAc(1) | N-glycan    | 1028,440     | 3 | 0,2              | 73                | Uncharacterized protein               | U3IT26 | tufted duck | trachea | 2,6                 | MS3   |
| K.IVNITLPK.I          | HexNAc(5)Hex(5)Fuc(1)NeuAc(1) | N-glycan    | 1054,135     | 3 | 0,2              | 93                | BPI fold containing family B member 3 | U3I5S1 | tufted duck | trachea | 2,6                 | MS3   |
| K.IVNITLPK.I          | HexNAc(5)Hex(5)Fuc(1)NeuAc(2) | N-glycan    | 1151,169     | 3 | 2,0              | 93                | BPI fold containing family B member 3 | U3I5S1 | tufted duck | trachea | 2,3;2,6             | MS3   |
| K.NITVIK.D            | HexNAc(5)Hex(5)Fuc(1)NeuAc(1) | N-glycan    | 984,090      | 3 | 0,2              | 119               | Thy-1 cell surface antigen (Fragment) | R0KPM3 | tufted duck | trachea | 2,3                 | MS3   |
| K.NITVIK.D            | HexNAc(4)Hex(5)Fuc(1)NeuAc(2) | N-glycan    | 1013,431     | 3 | 2,5              | 119               | Thy-1 cell surface antigen (Fragment) | R0KPM3 | tufted duck | trachea | 2,3;2,3             | 0,59  |
| R.TPNVSK.E            | HexNAc(5)Hex(4)NeuAc(2)       | N-glycan    | 964,388      | 3 | -2,0             | 131               | Uncharacterized protein               | U3I466 | tufted duck | ileum   | 2,6*                | MS3   |
| R.TPNVSK.E            | HexNAc(4)Hex(5)NeuAc(2)       | N-glycan    | 950,715      | 3 | 0,7              | 131               | Uncharacterized protein               | U3I466 | tufted duck | trachea | 2,6;2,6             | 0,96  |
| R.TPNVSK.E            | HexNAc(4)Hex(5)NeuAc(2)       | N-glycan    | 950,717      | 3 | 2,5              | 131               | Uncharacterized protein               | U3I466 | tufted duck | colon   | 2,6;2,6             | 0,95  |
| R.TPN[+2204.772]VSK.E | HexNAc(4)Hex(5)NeuAc(2)       | N-glycan    | 950,714      | 3 | -0,8             | 131               | Uncharacterized protein               | U3I466 | tufted duck | lung    | 2,6;2,6             | 1,65  |
| K.ANVTHYAEYDIFR.V     | HexNAc(4)Hex(6)NeuAc(1)       | N-glycan    | 1225,503     | 3 | 1,4              | 137               | Uncharacterized protein               | U3ID90 | tufted duck | lung    | 2,3                 | MS3   |
| K.ANVTHYAEYDIFR.V     | HexNAc(5)Hex(6)NeuAc(1)       | N-glycan    | 1293,196     | 3 | 1,0              | 137               | Uncharacterized protein               | U3ID90 | tufted duck | lung    | 2,3                 | MS3   |
| R.IVDVNLTSSEGV.V      | HexNAc(5)Hex(5)Fuc(1)NeuAc(1) | N-glycan    | 1146,488     | 3 | 0,7              | 137               | Transmembrane 9 superfamily member    | U3ISZ6 | tufted duck | colon   | 2,6                 | MS3   |
| R.IVDVNLTSSEGV.V      | HexNAc(5)Hex(6)Fuc(2)NeuAc(1) | N-glycan    | 1249,192     | 3 | 1,0              | 137               | Transmembrane 9 superfamily member    | U3ISZ6 | tufted duck | colon   | 2,6                 | MS3   |
| R.IVDVNLTSSEGV.V      | HexNAc(4)Hex(5)NeuAc(2)       | N-glycan    | 1127,141     | 3 | 1,7              | 137               | Transmembrane 9 superfamily member    | U3ISZ6 | tufted duck | trachea | 2,3;2,3             | 0,50  |
| R.IVDVNLTSSEGV.V      | HexNAc(4)Hex(5)Fuc(1)NeuAc(2) | N-glycan    | 1175,827     | 3 | 1,1              | 137               | Transmembrane 9 superfamily member    | U3ISZ6 | tufted duck | trachea | 2,3;2,6             | 0,67  |
| K.NGSLYAFR.G          | HexNAc(3)Hex(5)NeuAc(1)       | N-glycan    | 880,027      | 3 | -0,1             | 164               | Vitronectin                           | U3J2R0 | tufted duck | ileum   | 2,6                 | MS3   |
| K.NGSLYAFR.G          | HexNAc(3)Hex(6)NeuAc(1)       | N-glycan    | 934,046      | 3 | 1,7              | 164               | Vitronectin                           | U3J2R0 | tufted duck | ileum   | 2,6                 | MS3   |
| K.NGSLYAFR.G          | HexNAc(5)Hex(4)NeuAc(2)       | N-glycan    | 1058,427     | 3 | -0,1             | 164               | Vitronectin                           | U3J2R0 | tufted duck | ileum   | 2,6                 | MS3   |
| K.ETNCSK.A            | HexNAc(5)Hex(4)NeuAc(1)       | N-glycan    | 894,665      | 3 | 1,1              | 203               | Kininogen 1                           | U3IFX9 | tufted duck | lung    | 2,6                 | MS3   |
| K.IINEWVANK.T         | HexNAc(4)Hex(5)NeuAc(2)       | N-glycan    | 1097,795     | 3 | 1,4              | 223               | Serpin family C member 1              | U3IB67 | tufted duck | ileum   | 2,6;2,6             | 1,35  |
| K.IINEWVANK.T         | HexNAc(4)Hex(5)NeuAc(2)       | N-glycan    | 1097,794     | 3 | 0,1              | 223               | Serpin family C member 1              | U3IB67 | tufted duck | trachea | 2,6;2,6             | 1,03  |
| R.LANLSR.G            | HexNAc(5)Hex(5)Fuc(1)NeuAc(1) | N-glycan    | 979,409      | 3 | 0,1              | 317               | Clusterin                             | U3ISS8 | tufted duck | lung    | 2,3                 | MS3   |
| R.LANLSR.G            | HexNAc(5)Hex(5)Fuc(1)NeuAc(2) | N-glycan    | 1076,442     | 3 | 1,2              | 317               | Clusterin                             | U3ISS8 | tufted duck | lung    | 2,3;2,3             | MS3   |
| R.LDGNLTR.A           | HexNAc(5)Hex(5)Fuc(1)NeuAc(1) | N-glycan    | 1055,766     | 3 | 0,2              | 317               | Lumican                               | U3J2R5 | tufted duck | ileum   | 2,3                 | MS3   |
| R.LDGNLTR.A           | HexNAc(5)Hex(5)Fuc(1)NeuAc(1) | N-glycan    | 1055,765     | 3 | -0,8             | 317               | Lumican                               | U3J2R5 | tufted duck | trachea | 2,3                 | MS3   |
| R.LDGNLTR.A           | HexNAc(5)Hex(6)Fuc(1)NeuAc(1) | N-glycan    | 1109,783     | 3 | -0,3             | 317               | Lumican                               | U3J2R5 | tufted duck | trachea | 2,3                 | MS3   |
| R.LDGNLTR.A           | HexNAc(6)Hex(6)Fuc(1)NeuAc(1) | N-glycan    | 1177,477     | 3 | 0,5              | 317               | Lumican                               | U3J2R5 | tufted duck | trachea | 2,3                 | MS3   |
| R.LDGNLTR.A           | HexNAc(4)Hex(5)Fuc(1)NeuAc(2) | N-glycan    | 1085,105     | 3 | -0,1             | 317               | Lumican                               | U3J2R5 | tufted duck | trachea | 2,3;2,3             | MS3   |
| R.LDGNLTR.A           | HexNAc(5)Hex(5)Fuc(1)NeuAc(2) | N-glycan    | 1152,798     | 3 | 0,6              | 317               | Lumican                               | U3J2R5 | tufted duck | trachea | 2,3;2,3             | MS3   |
| R.LDGNLTR.A           | HexNAc(5)Hex(5)Fuc(1)NeuAc(2) | N-glycan    | 1152,799     | 3 | 0,9              | 317               | Lumican                               | U3J2R5 | tufted duck | colon   | 2,3;2,3             | MS3   |
| R.LDGNLTR.A           | HexNAc(6)Hex(6)Fuc(1)NeuAc(2) | N-glycan    | 1274,510     | 3 | 1,2              | 317               | Lumican                               | U3J2R5 | tufted duck | trachea | 2,3;2,3             | MS3   |

|                                 |                               |          |          |   |      |      |                                                                                |        |             |         |             |      |
|---------------------------------|-------------------------------|----------|----------|---|------|------|--------------------------------------------------------------------------------|--------|-------------|---------|-------------|------|
| R.LDGNLTR.A                     | HexNAc(6)Hex(6)Fuc(1)NeuAc(2) | N-glycan | 1274,511 | 3 | 1,9  | 317  | Lumican                                                                        | U3J2R5 | tufted duck | lung    | 2,3;2,3     | MS3  |
| K.ASLVEEGTGLEM(ox)NNTK.S        | HexNAc(4)Hex(5)NeuAc(1)       | N-glycan | 1208,167 | 3 | 1,0  | 325  | Uncharacterized protein                                                        | U3ITB1 | tufted duck | lung    | 2,6         | MS3  |
| K.ASLVEEGTGLEM(ox)NNTK.S        | HexNAc(4)Hex(5)NeuAc(2)       | N-glycan | 1305,200 | 3 | 1,8  | 325  | Uncharacterized protein                                                        | U3ITB1 | tufted duck | lung    | 2,6;2,6     | 1,10 |
| K.LVDGSGAPIANETVR.I             | HexNAc(4)Hex(5)NeuAc(1)       | N-glycan | 1138,161 | 3 | 1,8  | 376  | Uncharacterized protein                                                        | U3I742 | tufted duck | trachea | 2,6         | MS3  |
| K.LVDGSGAPIANETVR.I             | HexNAc(4)Hex(5)NeuAc(1)       | N-glycan | 1138,160 | 3 | 0,3  | 376  | Uncharacterized protein                                                        | U3I742 | tufted duck | lung    | 2,6         | MS3  |
| K.LVDGSGAPIANETVR.I             | HexNAc(5)Hex(6)NeuAc(1)       | N-glycan | 1259,872 | 3 | 1,7  | 376  | Uncharacterized protein                                                        | U3I742 | tufted duck | lung    | 2,6         | MS3  |
| K.LVDGSGAPIANETVR.I             | HexNAc(4)Hex(5)NeuAc(2)       | N-glycan | 1235,193 | 3 | 1,3  | 376  | Uncharacterized protein                                                        | U3I742 | tufted duck | lung    | 2,6;2,6     | MS3  |
| K.LVDGSGAPIANETVR.I             | HexNAc(4)Hex(5)NeuAc(2)       | N-glycan | 1235,193 | 3 | 1,4  | 376  | Uncharacterized protein                                                        | U3I742 | tufted duck | ileum   | 2,6;2,6     | 2,76 |
| K.LVDGSGAPIANETVR.I             | HexNAc(4)Hex(5)NeuAc(2)       | N-glycan | 1235,193 | 3 | 1,4  | 376  | Uncharacterized protein                                                        | U3I742 | tufted duck | trachea | 2,6;2,6     | 1,00 |
| K.LVDGSGAPIANETVR.I             | HexNAc(4)Hex(5)NeuAc(2)       | N-glycan | 1235,191 | 3 | -0,2 | 376  | Uncharacterized protein                                                        | U3I742 | tufted duck | colon   | 2,6;2,6     | 1,89 |
| R.LASSQIGPINASR.L               | HexNAc(5)Hex(5)Fuc(1)NeuAc(1) | N-glycan | 1192,850 | 3 | 1,3  | 412  | BPI fold containing family B member 3                                          | U3I5S1 | tufted duck | trachea | 2,6         | MS3  |
| R.TAATGEEKENLTAEVLDSLK.Y        | HexNAc(4)Hex(5)NeuAc(2)       | N-glycan | 1109,737 | 4 | -0,6 | 533  | Uncharacterized protein                                                        | U3I976 | tufted duck | lung    | 2,6;2,6     | MS3  |
| R.TAATGEEKENLTAEVLDSLK.Y        | HexNAc(4)Hex(5)NeuAc(2)       | N-glycan | 1109,990 | 4 | 1,4  | 533  | Uncharacterized protein                                                        | U3I976 | tufted duck | ileum   | 2,6;2,6     | 1,00 |
| R.TAATGEEKENLTAEVLDSLK.Y        | HexNAc(4)Hex(5)NeuAc(2)       | N-glycan | 1109,989 | 4 | 0,4  | 533  | Uncharacterized protein                                                        | U3I976 | tufted duck | colon   | 2,6;2,6     | 1,09 |
| K.KQAEEWLNK.S                   | HexNAc(5)Hex(6)Fuc(2)NeuAc(1) | N-glycan | 1239,513 | 3 | 0,8  | 603  | Serine/threonine kinase 31                                                     | U3J355 | tufted duck | trachea | 2,6         | MS3  |
| K.KQAEEWLNK.S                   | HexNAc(5)Hex(5)Fuc(1)NeuAc(2) | N-glycan | 925,633  | 4 | 0,9  | 603  | Serine/threonine kinase 31                                                     | U3J355 | tufted duck | trachea | 2,3;2,6     | MS3  |
| K.KHNTTIVIK.H                   | HexNAc(6)Hex(6)Fuc(1)NeuAc(1) | N-glycan | 918,144  | 4 | 0,5  | 755  | Uncharacterized protein                                                        | U3IL89 | tufted duck | trachea | 2,6         | MS3  |
| K.SGTVNGTFR.V                   | HexNAc(6)Hex(6)Fuc(1)NeuAc(3) | N-glycan | 1383,542 | 3 | 1,4  | 861  | Uncharacterized protein                                                        | U3IMB2 | tufted duck | trachea | 2,3;2,3;2,6 | MS3  |
| K.SGTVNGTFR.V                   | HexNAc(5)Hex(6)Fuc(1)NeuAc(2) | N-glycan | 1218,817 | 3 | 1,3  | 861  | Uncharacterized protein                                                        | U3IMB2 | tufted duck | trachea | 2,6;2,6     | MS3  |
| K.VTAANITDIVPNTESETK.V          | HexNAc(4)Hex(5)NeuAc(1)       | N-glycan | 1272,888 | 3 | 2,1  | 913  | Complement C3                                                                  | U3J6P0 | tufted duck | ileum   | 2,6         | MS3  |
| K.VTAANITDIVPNTESETK.V          | HexNAc(4)Hex(5)NeuAc(1)       | N-glycan | 954,917  | 4 | 1,0  | 913  | Complement C3                                                                  | U3J6P0 | tufted duck | trachea | 2,6         | MS3  |
| K.VTAANITDIVPNTESETK.V          | HexNAc(4)Hex(5)NeuAc(1)       | N-glycan | 1272,887 | 3 | 1,3  | 913  | Complement C3                                                                  | U3J6P0 | tufted duck | lung    | 2,6         | MS3  |
| K.VTAANITDIVPNTESETK.V          | HexNAc(4)Hex(5)NeuAc(2)       | N-glycan | 1369,585 | 3 | 1,1  | 913  | Complement C3                                                                  | U3J6P0 | tufted duck | lung    | 2,6;2,6     | MS3  |
| K.VTAANITDIVPNTESETK.V          | HexNAc(4)Hex(5)NeuAc(2)       | N-glycan | 1369,921 | 3 | 2,5  | 913  | Complement C3                                                                  | U3J6P0 | tufted duck | trachea | 2,6;2,6     | 1,12 |
| K.NLTK.L                        | HexNAc(5)Hex(4)NeuAc(2)       | N-glycan | 907,701  | 3 | 1,1  | 1030 | Myosin heavy chain 11                                                          | U3IFD3 | tufted duck | lung    | 2,6*        | MS3  |
| R.NLTVK.S                       | HexNAc(4)Hex(5)Fuc(1)NeuAc(1) | N-glycan | 878,704  | 3 | 2,5  | 1254 | Uncharacterized protein                                                        | U3IG09 | tufted duck | lung    | 2,3         | MS3  |
| R.NLTVK.S                       | HexNAc(5)Hex(5)Fuc(1)NeuAc(1) | N-glycan | 946,395  | 3 | -0,2 | 1254 | Uncharacterized protein                                                        | U3IG09 | tufted duck | lung    | 2,3         | MS3  |
| R.TIAEANNK.T                    | HexNAc(5)Hex(5)Fuc(1)NeuAc(1) | N-glycan | 1041,759 | 3 | 0,2  | 1332 | Laminin subunit gamma 1                                                        | U3I6H8 | tufted duck | lung    | 2,3         | MS3  |
| R.NVSNM(ox)VIVDVK.M             | HexNAc(4)Hex(5)NeuAc(2)       | N-glycan | 1146,813 | 3 | 0,2  | 1389 | Uncharacterized protein                                                        | U3I742 | tufted duck | trachea | 2,6;2,6     | MS3  |
| R.NVSNM(ox)VIVDVK.M             | HexNAc(4)Hex(5)NeuAc(2)       | N-glycan | 1146,813 | 3 | 0,3  | 1389 | Uncharacterized protein                                                        | U3I742 | tufted duck | lung    | 2,6;2,6     | MS3  |
| R.NVSNM(ox)VIVDVK.M             | HexNAc(4)Hex(5)NeuAc(2)       | N-glycan | 1146,814 | 3 | 1,1  | 1389 | Uncharacterized protein                                                        | U3I742 | tufted duck | colon   | 2,6;2,6     | 1,73 |
| R.NVSNM(VIVDVK.M                | HexNAc(4)Hex(5)NeuAc(2)       | N-glycan | 1141,483 | 3 | 1,3  | 1389 | Uncharacterized protein                                                        | U3I742 | tufted duck | ileum   | 2,6;2,6     | 1,65 |
| K.M(ox)GTDEDPGSGSNR.T           | HexNAc(4)Hex(5)NeuAc(2)       | N-glycan | 1162,764 | 3 | 0,7  | 1521 | Complement C3                                                                  | U3J6P0 | tufted duck | lung    | 2,6;2,6     | 1,01 |
| K.EAGNITTDGYEILGK.L             | HexNAc(4)Hex(5)Fuc(1)NeuAc(1) | N-glycan | 1214,178 | 3 | 1,0  | 2687 | Collagen type XII alpha 1 chain                                                | U3J0G6 | tufted duck | trachea | 2,3         | MS3  |
| K.EAGNITTDGYEILGK.L             | HexNAc(4)Hex(5)Fuc(1)NeuAc(2) | N-glycan | 1311,213 | 3 | 3,1  | 2687 | Collagen type XII alpha 1 chain                                                | U3J0G6 | tufted duck | trachea | 2,3;2,3     | 0,53 |
| K.VNFSQELSGNTK.S                | HexNAc(4)Hex(5)NeuAc(1)       | N-glycan | 1079,782 | 3 | 0,1  | 3429 | Apolipoprotein B                                                               | U3IWA4 | tufted duck | trachea | 2,6         | MS3  |
| K.ADVSHHSTM(ox)ESAHSFVTAASHQK.Q | HexNAc(1)Hex(1)NeuAc(2)       | O-glycan | 857,866  | 4 | -0,2 | 158  | LysM and putative peptidoglycan-binding domain-containing protein 3 (Fragment) | ROLLV4 | tufted duck | colon   | 2,3;2,6     | ND   |
| K.APVRQTKVPGER.H                | HexNAc(1)Hex(1)NeuAc(2)       | O-glycan | 762,369  | 3 | 1,8  | 83   | Polypeptide N-acetylgalactosaminyltransferase                                  | U3J257 | tufted duck | ileum   | 2,3;2,6     | ND   |
| K.APVRQTKVPGER.H                | HexNAc(1)Hex(1)NeuAc(2)       | O-glycan | 762,368  | 3 | 0,6  | 83   | Polypeptide N-acetylgalactosaminyltransferase                                  | U3J257 | tufted duck | colon   | 2,3;2,6     | ND   |
| K.APVRQTKVPGER.H                | HexNAc(1)Hex(1)NeuAc(2)       | O-glycan | 762,368  | 3 | 0,6  | 83   | Polypeptide N-acetylgalactosaminyltransferase                                  | U3J257 | tufted duck | trachea | 2,3;2,6     | ND   |



|                                        |                         |          |          |   |      |      |                                                                                  |        |             |         |         |      |
|----------------------------------------|-------------------------|----------|----------|---|------|------|----------------------------------------------------------------------------------|--------|-------------|---------|---------|------|
| K.AQSVETLPPGK.V                        | HexNAc(1)Hex(1)NeuAc(2) | O-glycan | 1037,470 | 2 | 0,0  | 35   | Polypeptide N-acetylgalactosaminyltransferase                                    | U3I3A3 | tufted duck | trachea | 2,3,2,6 | ND   |
| K.EHENRKPVPPTAVGSTSSLPAPDGEK.T         | HexNAc(1)Hex(1)NeuAc(1) | O-glycan | 839,903  | 4 | 1,1  | 331  | Fetuin B                                                                         | U3IFE7 | tufted duck | lung    | 2,6     | 1,38 |
| K.EPTKSR.V                             | HexNAc(1)Hex(1)NeuAc(2) | O-glycan | 832,860  | 2 | 0,9  | 1103 | Regulator of G protein signaling 12                                              | U3IMK7 | tufted duck | lung    | 2,3,2,6 | ND   |
| K.ESEKPSLEAEGQKEPVI<br>NER.Q           | HexNAc(1)Hex(1)NeuAc(2) | O-glycan | 850,889  | 4 | -1,0 | 158  | alpha-1,2-Mannosidase (Fragment)                                                 | R0K4C7 | tufted duck | trachea | 2,3,2,6 | ND   |
| K.EVTQVPAAAASEPGK.Q                    | HexNAc(1)Hex(1)NeuAc(2) | O-glycan | 777,684  | 3 | 1,4  | 171  | Fibroblast growth factor-binding protein 1 (Fragment)                            | R0LS14 | tufted duck | trachea | 2,3,2,6 | ND   |
| K.GGLPATLSPEEEEK.A                     | HexNAc(1)Hex(1)NeuAc(2) | O-glycan | 802,018  | 3 | 0,0  | 97   | Putative polypeptide N-acetylgalactosaminyltransferase-like protein 3 (Fragment) | R0JYD9 | tufted duck | colon   | 2,3,2,6 | ND   |
| K.GSSPVAPVHLVSEESPDK.<br>T             | HexNAc(1)Hex(1)NeuAc(2) | O-glycan | 928,085  | 3 | 0,1  | 4    | Transmembrane protein 165                                                        | U3IHR5 | tufted duck | trachea | 2,3,2,6 | ND   |
| K.GSSPVAPVHLVSEESPDK.<br>T             | HexNAc(1)Hex(1)NeuAc(2) | O-glycan | 928,088  | 3 | 2,7  | 4    | Transmembrane protein 165                                                        | U3IHR5 | tufted duck | colon   | 2,3,2,6 | ND   |
| K.IQASKDTEVNPNSDDQAIS<br>K.T           | HexNAc(1)Hex(1)NeuAc(2) | O-glycan | 1036,462 | 3 | 2,2  | 167  | Cancer susceptibility 4                                                          | U3IJL7 | tufted duck | trachea | 2,3,2,6 | ND   |
| K.IQASKDTEVNPNSDDQAIS<br>K.T           | HexNAc(1)Hex(1)NeuAc(2) | O-glycan | 1036,461 | 3 | 1,5  | 167  | Cancer susceptibility 4                                                          | U3IJL7 | tufted duck | lung    | 2,3,2,6 | ND   |
| K.KHPELPTVTEPK.V                       | HexNAc(1)Hex(1)NeuAc(2) | O-glycan | 807,383  | 3 | 0,0  | 537  | Fibulin 2                                                                        | U3J315 | tufted duck | trachea | 2,3,2,6 | ND   |
| K.LQIGAPVQPEEPPRSAR.S                  | HexNAc(1)Hex(1)NeuAc(2) | O-glycan | 931,447  | 3 | 2,1  | 76   | Polypeptide N-acetylgalactosaminyltransferase                                    | U3J1S2 | tufted duck | colon   | 2,3,2,6 | ND   |
| K.LQIGAPVQPEEPPRSAR.S                  | HexNAc(1)Hex(1)NeuAc(2) | O-glycan | 931,447  | 3 | 1,8  | 76   | Polypeptide N-acetylgalactosaminyltransferase                                    | U3J1S2 | tufted duck | ileum   | 2,3,2,6 | ND   |
| K.M(ox)PAQTKSPPEIDKEER<br>PEVDTK.K     | HexNAc(1)Hex(1)NeuAc(1) | O-glycan | 808,123  | 4 | 0,3  | 99   | Syndecan                                                                         | U3IZZ0 | tufted duck | lung    | 2,6     | 1,09 |
| K.M(ox)PAQTKSPPEIDKEER<br>PEVDTK.K     | HexNAc(1)Hex(1)NeuAc(2) | O-glycan | 880,896  | 4 | 0,2  | 99   | Syndecan                                                                         | U3IZZ0 | tufted duck | trachea | 2,3,2,6 | ND   |
| K.NRLSQQAR.Y                           | HexNAc(1)Hex(1)NeuAc(2) | O-glycan | 640,623  | 3 | -1,6 | 472  | Golgi integral membrane protein 4                                                | U3J030 | tufted duck | trachea | 2,3,2,6 | ND   |
| K.PAEVSSR.-                            | HexNAc(1)Hex(1)NeuAc(1) | O-glycan | 701,310  | 2 | 0,7  | 66   | Uncharacterized protein                                                          | U3I2W3 | tufted duck | lung    | 2,3     | 0,16 |
| K.SRDEIQAEIQTEKNK.V                    | HexNAc(1)Hex(1)NeuAc(2) | O-glycan | 684,814  | 4 | 0,7  | 131  | alpha-1,2-Mannosidase                                                            | U3INZ0 | tufted duck | lung    | 2,3,2,6 | ND   |
| K.SRDEIQAEIQTEKNK.V                    | HexNAc(1)Hex(1)NeuAc(2) | O-glycan | 684,812  | 4 | -1,5 | 131  | alpha-1,2-Mannosidase                                                            | U3INZ0 | tufted duck | trachea | 2,3,2,6 | ND   |
| K.TVAWLVT<br>PR.S                      | HexNAc(1)Hex(1)NeuAc(2) | O-glycan | 663,980  | 3 | -1,0 | 876  | Uncharacterized protein                                                          | U3I742 | tufted duck | trachea | 2,3,2,6 | ND   |
| K.TVAWLVT<br>PR.S                      | HexNAc(1)Hex(1)NeuAc(2) | O-glycan | 663,979  | 3 | -2,5 | 876  | Uncharacterized protein                                                          | U3I742 | tufted duck | trachea | 2,3,2,6 | ND   |
| K.TYTKIIDGRPVTEK.K                     | HexNAc(1)Hex(1)NeuAc(2) | O-glycan | 699,838  | 4 | -0,3 | 708  | Periostin                                                                        | U3IFM7 | tufted duck | trachea | 2,3,2,6 | ND   |
| R.APSPHSSLPVHHEA<br>VAEE<br>PKEDEKPK.E | HexNAc(2)Hex(2)NeuAc(4) | O-glycan | 948,818  | 5 | 0,3  | 264  | Golgi integral membrane protein 4                                                | U3J030 | tufted duck | trachea | 2,3,2,6 | ND   |
| R.APSSNEASGVTQLLPTAV<br>ER.R           | HexNAc(2)Hex(2)NeuAc(4) | O-glycan | 1307,904 | 3 | 2,9  | 41   | ST3 beta-galactoside alpha-2,3-sialyltransferase 6 (Fragment)                    | R0M6H0 | tufted duck | trachea | 2,3,2,6 | ND   |
| R.ETAPTLRPVAPPISGTGYQ<br>PR.P          | HexNAc(1)Hex(1)NeuAc(1) | O-glycan | 955,475  | 3 | 1,8  | 12   | Fibrinogen beta chain                                                            | U3I9E6 | tufted duck | ileum   | 2,6     | 0,84 |
| R.ETAPTLRPVAPPISGTGYQ<br>PR.P          | HexNAc(1)Hex(1)NeuAc(1) | O-glycan | 955,474  | 3 | 1,4  | 12   | Fibrinogen beta chain                                                            | U3I9E6 | tufted duck | lung    | 2,6     | 0,82 |
| R.ETAPTLRPVAPPISGTGYQ<br>PR.P          | HexNAc(1)Hex(1)NeuAc(1) | O-glycan | 716,856  | 4 | -0,7 | 12   | Fibrinogen beta chain                                                            | U3I9E6 | tufted duck | lung    | 2,6     | 0,94 |
| R.ETAPTLRPVAPPISGTGYQ<br>PR.P          | HexNAc(1)Hex(1)NeuAc(1) | O-glycan | 955,471  | 3 | -2,3 | 12   | Fibrinogen beta chain                                                            | U3I9E6 | tufted duck | colon   | 2,6     | 1,02 |
| R.ETAPTLRPVAPPISGTGYQ<br>PR.P          | HexNAc(1)Hex(1)NeuAc(1) | O-glycan | 955,474  | 3 | 1,0  | 12   | Fibrinogen beta chain                                                            | U3I9E6 | tufted duck | trachea | 2,6     | 1,04 |
| R.KPVPTAVGSTSSLPAPD<br>GEK.T           | HexNAc(1)Hex(1)NeuAc(1) | O-glycan | 897,772  | 3 | 1,5  | 336  | Fetuin B                                                                         | U3IFE7 | tufted duck | trachea | 2,6     | 1,33 |
| R.KPVPTAVGSTSSLPAPD<br>GEK.T           | HexNAc(1)Hex(1)NeuAc(1) | O-glycan | 897,772  | 3 | 1,7  | 336  | Fetuin B                                                                         | U3IFE7 | tufted duck | lung    | 2,6     | 1,29 |

|                            |                         |          |          |   |      |      |                                                       |            |             |         |                 |      |
|----------------------------|-------------------------|----------|----------|---|------|------|-------------------------------------------------------|------------|-------------|---------|-----------------|------|
| R.QKSPQEPR.K               | HexNAc(1)Hex(1)NeuAc(2) | O-glycan | 639,616  | 3 | -0,4 | 175  | Synaptotagmin like 4                                  | U3JD8      | tufted duck | trachea | 2,3,2,6         | ND   |
| R.RPVPTTATPLRPGSR.R        | HexNAc(2)Hex(2)NeuAc(2) | O-glycan | 730,349  | 4 | 0,5  | 2102 | Fibronectin 1                                         | U3IZ83     | tufted duck | lung    | 2,3,2,3         | 0,52 |
| R.RPVPTTATPLRPGSR.R        | HexNAc(2)Hex(2)NeuAc(2) | O-glycan | 730,349  | 4 | 0,3  | 2102 | Fibronectin 1                                         | U3IZ83     | tufted duck | trachea | 2,3,2,3         | 0,49 |
| R.RPVPTTATPLRPGSR.R        | HexNAc(2)Hex(2)NeuAc(3) | O-glycan | 803,123  | 4 | 0,2  | 2102 | Fibronectin 1                                         | U3IZ83     | tufted duck | ileum   | 2,3,2,3,<br>2,6 | 0,52 |
| R.RPVPTTATPLRPGSR.R        | HexNAc(2)Hex(2)NeuAc(4) | O-glycan | 875,896  | 4 | -0,2 | 2102 | Fibronectin 1                                         | U3IZ83     | tufted duck | colon   | 2,3,2,6         | ND   |
| R.SVSTARPSTGK.R            | HexNAc(2)Hex(2)NeuAc(2) | O-glycan | 801,686  | 3 | 0,8  | 139  | Cochlin                                               | U3J879     | tufted duck | trachea | 2,6,2,6         | 0,97 |
| R.SLPQLLSQANVR.T           | HexNAc(1)Hex(1)NeuAc(2) | O-glycan | 758,364  | 3 | 0,8  | 24   | N-sulfoglucosamine<br>sulphhydrolase                  | U3I4F8     | tufted duck | trachea | 2,3,2,6         | ND   |
| R.SVSTARPSTGK.R            | HexNAc(2)Hex(2)NeuAc(4) | O-glycan | 995,749  | 3 | 0,4  | 139  | Cochlin                                               | U3J879     | tufted duck | trachea | 2,3,2,6         | ND   |
| R.SALDAAARSTKPPR.Y         | HexNAc(2)Hex(1)NeuAc(2) | O-glycan | 864,405  | 3 | 2,5  | 39   | Family with sequence<br>similarity 3 member C         | U3J9G8     | tufted duck | ileum   | 2,6,2,6         | 2,93 |
| R.SQSEITPKAVTKR.Y          | HexNAc(2)Hex(2)NeuAc(4) | O-glycan | 860,882  | 4 | 0,4  | 392  | Golgi integral membrane<br>protein 4                  | U3J030     | tufted duck | trachea | 2,3,2,6         | ND   |
| R.STTTSQSIIEQQHHVR.N       | HexNAc(1)Hex(1)NeuAc(2) | O-glycan | 933,754  | 3 | -2,1 | 160  | G protein-coupled receptor<br>107                     | U3IQ48     | tufted duck | lung    | 2,3,2,6         | ND   |
| R.STTTSQSIIEQQHHVR.N       | HexNAc(1)Hex(1)NeuAc(2) | O-glycan | 700,570  | 4 | 0,9  | 160  | G protein-coupled receptor<br>107                     | U3IQ48     | tufted duck | ileum   | 2,3,2,6         | ND   |
| R.STTTSQSIIEQQHHVR.N       | HexNAc(1)Hex(1)NeuAc(2) | O-glycan | 700,568  | 4 | -1,3 | 160  | G protein-coupled receptor<br>107                     | U3IQ48     | tufted duck | trachea | 2,3,2,6         | ND   |
| R.STTTSQSIIEQQHHVR.N       | HexNAc(1)Hex(1)NeuAc(2) | O-glycan | 700,569  | 4 | 0,4  | 160  | G protein-coupled receptor<br>107                     | U3IQ48     | tufted duck | colon   | 2,3,2,6         | ND   |
| R.SVSTARPSTGK.R            | HexNAc(1)Hex(1)NeuAc(2) | O-glycan | 679,974  | 3 | 0,2  | 139  | Cochlin                                               | U3J879     | tufted duck | trachea | 2,3,2,6         | ND   |
| R.TEIMSEILQK.S             | HexNAc(1)Hex(1)NeuAc(2) | O-glycan | 713,654  | 3 | -2,9 | 107  | Uncharacterized protein                               | U3J732     | tufted duck | lung    | 2,3,2,6         | ND   |
| R.TEIMSEILQK.S             | HexNAc(1)Hex(1)NeuAc(2) | O-glycan | 713,654  | 3 | -2,9 | 107  | Uncharacterized protein                               | U3J732     | tufted duck | trachea | 2,3,2,6         | ND   |
| R.TNNQLK.L                 | HexNAc(1)Hex(1)NeuAc(2) | O-glycan | 832,860  | 2 | 0,9  | 1362 | RP1, axonemal microtubule<br>associated               | U3I6P0     | tufted duck | lung    | 2,3,2,6         | ND   |
| R.TKPESR.K                 | HexNAc(1)Hex(1)NeuAc(1) | O-glycan | 687,312  | 2 | 0,7  | 243  | G protein-coupled receptor<br>182                     | U3HYX<br>6 | tufted duck | lung    | 2,3             | 0,43 |
| R.TLPLVPITTPAPK.S          | HexNAc(2)Hex(2)NeuAc(2) | O-glycan | 887,431  | 3 | -0,9 | 1751 | Collagen type XII alpha 1 chain                       | U3J0G6     | tufted duck | trachea | 2,3,2,3         | 0,65 |
| R.TLPLVPITTPAPK.S          | HexNAc(2)Hex(2)NeuAc(3) | O-glycan | 984,462  | 3 | -1,0 | 1751 | Collagen type XII alpha 1<br>chain                    | U3J0G6     | tufted duck | trachea | 2,3,2,3,<br>2,6 | 0,81 |
| R.TLPLVPITTPAPK.S          | HexNAc(2)Hex(2)NeuAc(4) | O-glycan | 1081,496 | 3 | 0,9  | 1751 | Collagen type XII alpha 1<br>chain                    | U3J0G6     | tufted duck | trachea | 2,3,2,6         | ND   |
| R.VHGDTVQISNM(ox)R.A       | HexNAc(1)Hex(1)NeuAc(2) | O-glycan | 807,684  | 3 | 0,8  | 65   | Mannosidase endo-alpha                                | U3IBN6     | tufted duck | trachea | 2,3,2,6         | ND   |
| R.VISEATPTLAAGKDPEK.S      | HexNAc(2)Hex(2)NeuAc(4) | O-glycan | 1207,864 | 3 | 2,4  | 731  | Dystroglycan 1                                        | U3IBQ2     | tufted duck | lung    | 2,3,2,6         | ND   |
| R.VISEATPTLAAGKDPEK.S      | HexNAc(2)Hex(2)NeuAc(4) | O-glycan | 1207,864 | 3 | 2,7  | 731  | Dystroglycan 1                                        | U3IBQ2     | tufted duck | trachea | 2,3,2,6         | ND   |
| R.VNDTLR.K                 | HexNAc(1)Hex(1)NeuAc(1) | O-glycan | 687,313  | 2 | 0,9  | 2030 | Laminin subunit alpha 1                               | U3ISC0     | tufted duck | lung    | 2,3             | 0,40 |
| R.VSDGEDKAQSVETLPPGK.<br>V | HexNAc(1)Hex(1)NeuAc(2) | O-glycan | 935,421  | 3 | 0,2  | 28   | Polypeptide N-<br>acetylgalactosaminyltransfera<br>se | U3I3A3     | tufted duck | trachea | 2,3,2,6         | ND   |
| R.VTTTAPVQACEPER.G         | HexNAc(1)Hex(1)NeuAc(1) | O-glycan | 735,321  | 3 | 0,8  | 198  | Prothrombin                                           | U3J210     | tufted duck | lung    | 2,3             | 0,65 |
| R.VTTTAPVQACEPER.G         | HexNAc(1)Hex(1)NeuAc(1) | O-glycan | 735,322  | 3 | 1,4  | 198  | Prothrombin                                           | U3J210     | tufted duck | trachea | 2,3             | 0,69 |
| R.VTTTAPVQACEPER.G         | HexNAc(1)Hex(1)NeuAc(1) | O-glycan | 735,320  | 3 | -0,6 | 198  | Prothrombin                                           | U3J210     | tufted duck | colon   | 2,3             | 0,70 |
| S.GPTGAVPTSR.C             | HexNAc(1)Hex(1)NeuAc(1) | O-glycan | 799,868  | 2 | 1,0  | 2    | Uncharacterized protein                               | U3IJ28     | tufted duck | lung    | 2,3             | 0,53 |

1099 **Table S8.** Annotated list of sialylated *N*- and *O*-linked glycans detected in sampled chicken tissues. *m/z* — mass to charge  
 1100 ratio, *z* — charge, UID — Uniprot ID, and Ln/Nn — number of LacNAc/number of Neu5Ac ratio, 0.4–0.6 for Neu5Acα2,3 and  
 1101 0.8–1.5 for Neu5Acα2,6 terminated glycopeptides.

1102

| Sequence                     | Glycan                        | Glycan type | Observed <i>m/z</i> | <i>z</i> | Mass error (ppm) | Starting position | Protein Name                      | UID        | Species | Tissue  | Neu5Ac isomer | Ln/Nn |
|------------------------------|-------------------------------|-------------|---------------------|----------|------------------|-------------------|-----------------------------------|------------|---------|---------|---------------|-------|
| R.M(ox)VSVFEFAVAATNCTSQQAK.D | HexNAc(4)Hex(5)NeuAc(2)       | N-glycan    | 1063,681            | 4        | 0,4              | 194               | Alpha 2-HS glycoprotein           | E1BZE1     | chicken | lung    | 2,6;2,6       | 1,06  |
| R.LNETCVVK.N                 | HexNAc(4)Hex(5)NeuAc(1)       | N-glycan    | 955,719             | 3        | 0,0              | 89                | Alpha-1-acid glycoprotein         | Q8JIG5     | chicken | lung    | 2,6           | MS3   |
| R.LNETCVVK.N                 | HexNAc(4)Hex(5)NeuAc(2)       | N-glycan    | 1052,752            | 3        | 1,6              | 89                | Alpha-1-acid glycoprotein         | Q8JIG5     | chicken | lung    | 2,6;2,6       | MS3   |
| R.LNETCVVK.N                 | HexNAc(4)Hex(5)NeuAc(2)       | N-glycan    | 1052,751            | 3        | 0,5              | 89                | Alpha-1-acid glycoprotein         | Q8JIG5     | chicken | colon   | 2,6;2,6       | 1,09  |
| R.LNETCVVK.N                 | HexNAc(4)Hex(5)NeuAc(2)       | N-glycan    | 1052,750            | 3        | -0,1             | 89                | Alpha-1-acid glycoprotein         | Q8JIG5     | chicken | colon   | 2,6;2,6       | 1,19  |
| R.LNETCVVK.N                 | HexNAc(5)Hex(6)NeuAc(2)       | N-glycan    | 1174,461            | 3        | -0,3             | 89                | Alpha-1-acid glycoprotein         | Q8JIG5     | chicken | ileum   | 2,6           | MS3   |
| R.ENEAAFPLNASLPR.Y           | HexNAc(3)Hex(6)NeuAc(1)       | N-glycan    | 1134,480            | 3        | -0,3             | 562               | Amine oxidase                     | A0A1D5PTV1 | chicken | lung    | 2,3           | MS3   |
| K.IINEWVANK.T                | HexNAc(4)Hex(5)NeuAc(2)       | N-glycan    | 1097,795            | 3        | 1,2              | 174               | Antithrombin-III                  | A0A1L1S0N7 | chicken | lung    | 2,6;2,6       | 0,99  |
| R.KIINEWVANK.T               | HexNAc(4)Hex(5)NeuAc(2)       | N-glycan    | 1140,488            | 3        | -3,5             | 173               | Antithrombin-III                  | A0A1L1S0N7 | chicken | lung    | 2,6;2,6       | 1,05  |
| K.IINEWVANK.T                | HexNAc(4)Hex(5)NeuAc(2)       | N-glycan    | 1097,795            | 3        | 0,9              | 174               | Antithrombin-III                  | A0A1L1S0N7 | chicken | ileum   | 2,6;2,6       | MS3   |
| K.IINEWVANK.T                | HexNAc(4)Hex(5)NeuAc(2)       | N-glycan    | 1097,798            | 3        | 3,9              | 174               | Antithrombin-III                  | A0A1L1S0N7 | chicken | trachea | 2,6;2,6       | 1,18  |
| R.KIINEWVANK.T               | HexNAc(4)Hex(5)NeuAc(2)       | N-glycan    | 1140,493            | 3        | 1,0              | 173               | Antithrombin-III                  | A0A1L1S0N7 | chicken | ileum   | 2,6;2,6       | 1,31  |
| K.IINEWVANK.T                | HexNAc(4)Hex(5)NeuAc(2)       | N-glycan    | 1097,795            | 3        | 0,8              | 174               | Antithrombin-III                  | A0A1L1S0N7 | chicken | colon   | 2,6;2,6       | 1,02  |
| R.KIINEWVANK.T               | HexNAc(4)Hex(5)NeuAc(2)       | N-glycan    | 1140,493            | 3        | 0,8              | 173               | Antithrombin-III                  | A0A1L1S0N7 | chicken | colon   | 2,6;2,6       | 1,05  |
| K.M(ox)NFSQELSGNTK.S         | HexNAc(4)Hex(5)NeuAc(1)       | N-glycan    | 1095,773            | 3        | 2,2              | 3431              | Apolipoprotein B                  | F1NV02     | chicken | lung    | 2,6           | MS3   |
| K.M(ox)NFSQELSGNTK.S         | HexNAc(4)Hex(5)NeuAc(2)       | N-glycan    | 1192,805            | 3        | 2,1              | 3431              | Apolipoprotein B                  | F1NV02     | chicken | lung    | 2,6;2,6       | 2,17  |
| R.GLEVTNGTAR.G               | HexNAc(4)Hex(5)NeuAc(2)       | N-glycan    | 1074,772            | 3        | -0,9             | 648               | Band 3 anion transport protein    | B3AT       | chicken | lung    | 2,3;2,3       | MS3   |
| R.GLEVTNGTAR.G               | HexNAc(5)Hex(6)NeuAc(2)       | N-glycan    | 1196,485            | 3        | 0,8              | 648               | Band 3 anion transport protein    | B3AT       | chicken | lung    | 2,3;2,3       | MS3   |
| R.GLEVTNGTAR.G               | HexNAc(5)Hex(6)NeuAc(2)       | N-glycan    | 1196,485            | 3        | 1,1              | 648               | Band 3 anion transport protein    | B3AT       | chicken | trachea | 2,3;2,3       | MS3   |
| K.GNVSIEVEPQVVAYK.K          | HexNAc(6)Hex(6)Fuc(1)NeuAc(1) | N-glycan    | 1065,962            | 4        | 3,1              | 221               | Basigin                           | BASI       | chicken | colon   | 2,6           | MS3   |
| K.QTLNDTANPR.S               | HexNAc(4)Hex(5)NeuAc(2)       | N-glycan    | 1112,116            | 3        | 0,6              | 11                | Carboxypeptidase B2               | F1NXB6     | chicken | lung    | 2,6;2,6       | 1,07  |
| R.NYTLHPHGKY.Y               | HexNAc(4)Hex(5)NeuAc(2)       | N-glycan    | 1124,135            | 3        | 1,7              | 118               | Ceruloplasmin                     | A0A1D5PBP6 | chicken | lung    | 2,6;2,6       | 1,21  |
| K.EAGNITTDGYEILGK.L          | HexNAc(4)Hex(5)Fuc(1)NeuAc(1) | N-glycan    | 1214,177            | 3        | 0,6              | 2680              | Collagen alpha-1(XII) chain       | COCA1      | chicken | trachea | 2,3           | MS3   |
| R.SNYTITPK.D                 | HexNAc(4)Hex(5)Fuc(1)NeuAc(1) | N-glycan    | 995,079             | 3        | 1,2              | 214               | Collagen alpha-2(VI) chain        | CO6A2      | chicken | trachea | 2,3           | MS3   |
| R.NNVSLDELAK.D               | HexNAc(4)Hex(5)NeuAc(2)       | N-glycan    | 1103,120            | 3        | -0,3             | 508               | Complement C1r                    | F1NAB7     | chicken | lung    | 2,6;2,6       | 0,96  |
| K.NFTEYTA.N                  | HexNAc(4)Hex(5)NeuAc(2)       | N-glycan    | 1060,085            | 3        | 1,4              | 292               | Complement C8 alpha chain         | F1NJU5     | chicken | lung    | 2,6;2,6       | 1     |
| K.QNSSDKTPGDVDITDVAYYFEK.D   | HexNAc(5)Hex(4)Fuc(1)NeuAc(2) | N-glycan    | 1221,757            | 4        | 0,9              | 192               | Epithelial cell adhesion molecule | EPCAM      | chicken | colon   | 2,6;2,6       | MS3   |
| R.M(ox)QGIIDDTDQNYSQLR.I     | HexNAc(3)Hex(5)NeuAc(1)       | N-glycan    | 1170,801            | 3        | 1,2              | 70                | Fibrinogen alpha chain            | FIBA       | chicken | lung    | 2,6           | MS3   |
| R.M(ox)QGIIDDTDQNYSQLR.I     | HexNAc(4)Hex(5)NeuAc(1)       | N-glycan    | 1238,495            | 3        | 1,6              | 70                | Fibrinogen alpha chain            | FIBA       | chicken | lung    | 2,6           | MS3   |
| K.GNAGNALM(ox)EGASQLYGENR.T  | HexNAc(4)Hex(5)NeuAc(1)       | N-glycan    | 971,146             | 4        | -0,6             | 350               | Fibrinogen beta chain (Fragment)  | FIBB       | chicken | colon   | 2,6           | MS3   |
| K.GNAGNALM(ox)EGASQLYGENR.T  | HexNAc(4)Hex(5)NeuAc(1)       | N-glycan    | 971,146             | 4        | -0,5             | 350               | Fibrinogen beta chain (Fragment)  | FIBB       | chicken | lung    | 2,6           | MS3   |

|                             |                               |          |          |   |      |      |                                                    |            |         |         |         |      |
|-----------------------------|-------------------------------|----------|----------|---|------|------|----------------------------------------------------|------------|---------|---------|---------|------|
| K.GNAGNALM(ox)EGASQLYGENR.T | HexNAc(4)Hex(5)NeuAc(2)       | N-glycan | 1391,560 | 3 | 1,4  | 350  | Fibrinogen beta chain (Fragment)                   | FIBB       | chicken | lung    | 2,6;2,6 | 1,26 |
| K.GNAGNALMEGASQLYGENR.T     | HexNAc(4)Hex(5)NeuAc(2)       | N-glycan | 1039,923 | 4 | 1,2  | 350  | Fibrinogen beta chain (Fragment)                   | FIBB       | chicken | ileum   | 2,6;2,6 | 1,03 |
| K.LNLTTDPK.F                | HexNAc(3)Hex(6)Fuc(1)NeuAc(1) | N-glycan | 974,075  | 3 | 1,0  | 127  | Golgi apparatus protein 1                          | GSLG1      | chicken | trachea | 2,6     | MS3  |
| R.HGNTSWGAGDR.C             | HexNAc(4)Hex(5)NeuAc(2)       | N-glycan | 1159,446 | 3 | 0,0  | 188  | Hemopexin                                          | H9L385     | chicken | lung    | 2,6;2,6 | MS3  |
| R.HGNTSWGAGDR.C             | HexNAc(4)Hex(5)NeuAc(2)       | N-glycan | 1159,446 | 3 | 0,0  | 188  | Hemopexin                                          | H9L385     | chicken | trachea | 2,6;2,6 | 1,31 |
| R.EGNHTNYFK.V               | HexNAc(4)Hex(5)NeuAc(2)       | N-glycan | 1105,432 | 3 | 2,4  | 172  | Histidine rich glycoprotein                        | F1NL38     | chicken | colon   | 2,6;2,6 | 0,97 |
| K.ETNCSR.G                  | HexNAc(4)Hex(5)NeuAc(1)       | N-glycan | 890,325  | 3 | 1,3  | 205  | Histidine rich glycoprotein                        | F1NL38     | chicken | lung    | 2,6     | MS3  |
| K.ETNCSR.G                  | HexNAc(4)Hex(5)NeuAc(2)       | N-glycan | 987,356  | 3 | 0,4  | 205  | Histidine rich glycoprotein                        | F1NL38     | chicken | lung    | 2,6;2,6 | MS3  |
| R.EGNHTNYFK.V               | HexNAc(4)Hex(5)NeuAc(1)       | N-glycan | 1008,397 | 3 | -0,7 | 172  | Histidine rich glycoprotein                        | F1NL38     | chicken | lung    | 2,6     | MS3  |
| R.EGNHTNYFK.V               | HexNAc(4)Hex(5)NeuAc(2)       | N-glycan | 1105,431 | 3 | 1,9  | 172  | Histidine rich glycoprotein                        | F1NL38     | chicken | lung    | 2,6;2,6 | 0,88 |
| R.EGNHTNYFK.V               | HexNAc(4)Hex(5)NeuAc(1)       | N-glycan | 1008,398 | 3 | 0,1  | 172  | Histidine rich glycoprotein                        | F1NL38     | chicken | ileum   | 2,6     | MS3  |
| R.EGNHTNYFK.V               | HexNAc(4)Hex(5)NeuAc(1)       | N-glycan | 1008,397 | 3 | -0,5 | 172  | Histidine rich glycoprotein                        | F1NL38     | chicken | trachea | 2,6     | MS3  |
| R.EGNHTNYFK.V               | HexNAc(4)Hex(5)NeuAc(2)       | N-glycan | 1105,430 | 3 | 0,3  | 172  | Histidine rich glycoprotein                        | F1NL38     | chicken | trachea | 2,6;2,6 | MS3  |
| R.EGNHTNYFK.V               | HexNAc(4)Hex(5)NeuAc(2)       | N-glycan | 1105,431 | 3 | 1,3  | 172  | Histidine rich glycoprotein                        | F1NL38     | chicken | ileum   | 2,6;2,6 | 1,08 |
| R.VTHNGTSITK.T              | HexNAc(5)Hex(5)Fuc(1)NeuAc(1) | N-glycan | 1107,465 | 3 | 0,7  | 87   | Ig lambda chain C region                           | LAC        | chicken | colon   | 2,6     | MS3  |
| R.VTHNGTSITK.T              | HexNAc(4)Hex(5)Fuc(1)NeuAc(1) | N-glycan | 1039,771 | 3 | 0,2  | 87   | Ig lambda chain C region                           | LAC        | chicken | lung    | 2,6     | MS3  |
| R.VTHNGTSITK.T              | HexNAc(5)Hex(5)Fuc(1)NeuAc(1) | N-glycan | 830,851  | 4 | 0,9  | 87   | Ig lambda chain C region                           | LAC        | chicken | lung    | 2,6     | MS3  |
| R.VTHNGTSITK.T              | HexNAc(5)Hex(5)Fuc(1)NeuAc(1) | N-glycan | 1107,465 | 3 | 0,4  | 87   | Ig lambda chain C region                           | LAC        | chicken | ileum   | 2,6     | MS3  |
| R.NASILCQTR.G               | HexNAc(5)Hex(5)NeuAc(1)       | N-glycan | 1056,758 | 3 | -0,1 | 130  | Ig mu chain C region                               | IGHM       | chicken | lung    | 2,6     | MS3  |
| K.KGQNETIK.I                | HexNAc(4)Hex(5)Fuc(1)NeuAc(2) | N-glycan | 1090,118 | 3 | 0,9  | 442  | Integrin beta-1                                    | ITB1       | chicken | lung    | 2,3;2,3 | 0,53 |
| R.IAATGEEKENFTAK.A          | HexNAc(4)Hex(5)NeuAc(2)       | N-glycan | 1238,518 | 3 | 1,7  | 570  | Inter-alpha-trypsin inhibitor heavy chain 3        | A0A1D5P4L6 | chicken | colon   | 2,6;2,6 | 1,28 |
| K.ENFTAK.A                  | HexNAc(4)Hex(5)NeuAc(2)       | N-glycan | 972,046  | 3 | 0,2  | 578  | Inter-alpha-trypsin inhibitor heavy chain 3        | A0A1D5P4L6 | chicken | lung    | 2,6;2,6 | MS3  |
| R.IAATGEEKENFTAK.A          | HexNAc(4)Hex(5)NeuAc(1)       | N-glycan | 1141,484 | 3 | 0,4  | 570  | Inter-alpha-trypsin inhibitor heavy chain 3        | A0A1D5P4L6 | chicken | lung    | 2,6     | MS3  |
| R.IAATGEEKENFTAK.A          | HexNAc(4)Hex(5)NeuAc(2)       | N-glycan | 929,138  | 4 | -0,8 | 570  | Inter-alpha-trypsin inhibitor heavy chain 3        | A0A1D5P4L6 | chicken | lung    | 2,6;2,6 | MS3  |
| R.IAATGEEKENFTAK.A          | HexNAc(5)Hex(6)NeuAc(2)       | N-glycan | 1360,229 | 3 | 2,1  | 570  | Inter-alpha-trypsin inhibitor heavy chain 3        | A0A1D5P4L6 | chicken | lung    | 2,6;2,6 | MS3  |
| K.RIAATGEEKENFTAK.A         | HexNAc(4)Hex(5)NeuAc(2)       | N-glycan | 968,164  | 4 | 0,6  | 569  | Inter-alpha-trypsin inhibitor heavy chain 3        | A0A1D5P4L6 | chicken | lung    | 2,6;2,6 | 0,97 |
| K.ENFTAK.A                  | HexNAc(4)Hex(5)NeuAc(2)       | N-glycan | 972,046  | 3 | 0,1  | 578  | Inter-alpha-trypsin inhibitor heavy chain 3        | A0A1D5P4L6 | chicken | ileum   | 2,6;2,6 | 1,19 |
| R.IAATGEEKENFTAK.A          | HexNAc(4)Hex(5)NeuAc(2)       | N-glycan | 1238,518 | 3 | 2,1  | 570  | Inter-alpha-trypsin inhibitor heavy chain 3        | A0A1D5P4L6 | chicken | trachea | 2,6;2,6 | 0,99 |
| K.IKYEIETNCSK.D             | HexNAc(4)Hex(5)NeuAc(2)       | N-glycan | 1236,493 | 3 | 1,5  | 197  | Kininogen 1                                        | A0A1L1RNR4 | chicken | lung    | 2,6;2,6 | MS3  |
| K.TNCSK.K                   | HexNAc(4)Hex(5)NeuAc(2)       | N-glycan | 935,008  | 3 | 1,6  | 325  | Kininogen 1                                        | A0A1L1RNR4 | chicken | lung    | 2,6;2,6 | MS3  |
| K.TSNVSDQCK.I               | HexNAc(4)Hex(5)NeuAc(2)       | N-glycan | 1078,069 | 3 | 0,6  | 119  | Kininogen 1                                        | A0A1L1RNR4 | chicken | lung    | 2,6;2,6 | MS3  |
| R.SFVLSQVDETSNATEGESQR.A    | HexNAc(4)Hex(5)NeuAc(2)       | N-glycan | 1161,731 | 4 | 0,2  | 390  | Kininogen 1                                        | A0A1L1RNR4 | chicken | lung    | 2,6;2,6 | MS3  |
| K.TSNVSDQCK.I               | HexNAc(4)Hex(5)NeuAc(2)       | N-glycan | 1078,068 | 3 | -0,4 | 119  | Kininogen 1                                        | A0A1L1RNR4 | chicken | ileum   | 2,6;2,6 | 0,99 |
| K.TSNVSDQCK.I               | HexNAc(4)Hex(5)NeuAc(2)       | N-glycan | 1078,069 | 3 | 0,1  | 119  | Kininogen 1                                        | A0A1L1RNR4 | chicken | colon   | 2,6;2,6 | 0,92 |
| K.APANNISSIQR.I             | HexNAc(4)Hex(5)Fuc(1)NeuAc(1) | N-glycan | 1106,468 | 3 | 0,1  | 810  | Laminin subunit alpha 4                            | F1NSZ5     | chicken | lung    | 2,3     | MS3  |
| K.GLNYTIR.L                 | HexNAc(4)Hex(5)Fuc(1)NeuAc(2) | N-glycan | 1063,104 | 3 | 1,0  | 172  | Laminin subunit beta-1                             | F1NJ23     | chicken | lung    | 2,3;2,6 | 0,65 |
| R.GSKDNATESVSLR.T           | HexNAc(4)Hex(5)Fuc(1)NeuAc(2) | N-glycan | 1238,843 | 3 | 1,1  | 2119 | Low-density lipoprotein receptor-related protein 1 | LRP1       | chicken | lung    | 2,3;2,3 | 0,6  |

|                               |                                               |          |          |   |      |      |                                             |            |         |         |             |      |
|-------------------------------|-----------------------------------------------|----------|----------|---|------|------|---------------------------------------------|------------|---------|---------|-------------|------|
| R.LDGNLTRA.A                  | HexNAc(4)Hex(5)Fuc(1)NeuAc(2)                 | N-glycan | 1085,105 | 3 | 0,5  | 316  | Lumican                                     | LUM        | chicken | lung    | 2,3;2,3     | MS3  |
| R.LDGNLTRA.A                  | HexNAc(4)Hex(5)Fuc(1)NeuAc(2)                 | N-glycan | 1085,105 | 3 | -0,1 | 316  | Lumican                                     | LUM        | chicken | trachea | 2,3;2,3     | MS3  |
| K.APTFEASNDMSSELRATVGNYSYK.C  | HexNAc(4)Hex(7)NeuAc(1)                       | N-glycan | 1179,239 | 4 | 0,6  | 311  | Lysosome-associated membrane glycoprotein 1 | A0A1D5PG23 | chicken | ileum   | 2,3         | MS3  |
| R.PANTSLDR.G                  | HexNAc(4)Hex(5)Fuc(1)NeuAc(2)                 | N-glycan | 1075,430 | 3 | 0,3  | 304  | Mannose receptor C type 2                   | F1NP60     | chicken | lung    | 2,3;2,3     | MS3  |
| R.NPDGQM(ox)PWCYTTNATAR.W     | HexNAc(4)Hex(5)NeuAc(2)                       | N-glycan | 1081,163 | 4 | 1,1  | 326  | Plasminogen                                 | F1NWX6     | chicken | lung    | 2,6;2,6     | MS3  |
| K.VLKDNNGTEDEIR.S             | HexNAc(3)Hex(4)Fuc(1)NeuAc(1)                 | N-glycan | 1028,441 | 3 | 0,9  | 77   | Prosaposin                                  | SAP        | chicken | lung    | 2,3         | MS3  |
| K.VLKDNNGTEDEIR.S             | HexNAc(3)Hex(4)Fuc(1)NeuAc(1)                 | N-glycan | 1028,441 | 3 | 0,9  | 77   | Prosaposin                                  | SAP        | chicken | trachea | 2,3         | MS3  |
| R.GTINYTK.S                   | HexNAc(4)Hex(5)NeuAc(1)                       | N-glycan | 904,038  | 3 | 0,9  | 119  | Prothrombin                                 | A0A1L1RV31 | chicken | lung    | 2,6         | MS3  |
| R.GTINYTK.S                   | HexNAc(4)Hex(5)NeuAc(2)                       | N-glycan | 1001,069 | 3 | 0,4  | 119  | Prothrombin                                 | A0A1L1RV31 | chicken | lung    | 2,6;2,6     | MS3  |
| R.NPDNNSEGPWCYTR.D            | HexNAc(4)Hex(5)NeuAc(2)                       | N-glycan | 1301,819 | 3 | 1,6  | 158  | Prothrombin                                 | A0A1L1RV31 | chicken | lung    | 2,6;2,6     | 1,43 |
| R.GTINYTK.S                   | HexNAc(4)Hex(5)NeuAc(2)                       | N-glycan | 1001,070 | 3 | 0,9  | 119  | Prothrombin                                 | A0A1L1RV31 | chicken | colon   | 2,6;2,6     | 0,93 |
| R.GTINYTK.S                   | HexNAc(4)Hex(5)NeuAc(2)                       | N-glycan | 1001,069 | 3 | -0,1 | 119  | Prothrombin                                 | A0A1L1RV31 | chicken | trachea | 2,6;2,6     | MS3  |
| K.DAHTHENGTYNM(ox)PDLPLEFHR.E | HexNAc(4)Hex(5)NeuAc(2)                       | N-glycan | 943,786  | 5 | 2,2  | 33   | Serpin family D member 1                    | A0A1D5PLZ2 | chicken | trachea | 2,6;2,6     | 0,79 |
| K.DAHTHENGTYNM(ox)PDLPLEFHR.E | HexNAc(4)Hex(5)NeuAc(2)                       | N-glycan | 1179,481 | 4 | 2,7  | 33   | Serpin family D member 1                    | A0A1D5PLZ2 | chicken | lung    | 2,6;2,6     | 1,03 |
| R.ELSGNESLDLQR.I              | HexNAc(4)Hex(5)NeuAc(2)                       | N-glycan | 1189,154 | 3 | 1,6  | 286  | Serpin family G member 1                    | F1NA58     | chicken | lung    | 2,6;2,6     | 1,03 |
| R.KQETTPINDNVSQCCSSSYANR.R    | HexNAc(4)Hex(5)NeuAc(2)                       | N-glycan | 1186,212 | 4 | 0,5  | 491  | Serum albumin                               | A0A1D5NW68 | chicken | lung    | 2,6;2,6     | MS3  |
| K.NITVIK.D                    | HexNAc(4)Hex(5)Fuc(1)NeuAc(2)                 | N-glycan | 1013,429 | 3 | 0,9  | 118  | Thy-1 membrane glycoprotein                 | THY1       | chicken | trachea | 2,3;2,3     | 0,50 |
| K.NITVIK.D                    | HexNAc(5)Hex(5)Fuc(1)NeuAc(1)                 | N-glycan | 984,090  | 3 | 0,3  | 118  | Thy-1 membrane glycoprotein                 | THY1       | chicken | lung    | 2,3         | MS3  |
| K.NITVIK.D                    | HexNAc(4)Hex(5)Fuc(1)NeuAc(2)                 | N-glycan | 1519,641 | 2 | 1,6  | 118  | Thy-1 membrane glycoprotein                 | THY1       | chicken | lung    | 2,3;2,3     | 0,58 |
| K.NITVIK.D                    | HexNAc(5)Hex(5)Fuc(1)NeuAc(1)                 | N-glycan | 984,090  | 3 | 0,1  | 118  | Thy-1 membrane glycoprotein                 | THY1       | chicken | trachea | 2,6         | MS3  |
| R.IVDVNLTSEGG.V               | HexNAc(5)Hex(5)Fuc(1)NeuAc(1)                 | N-glycan | 1146,488 | 3 | 0,7  | 171  | Transmembrane 9 superfamily member          | F1NRG5     | chicken | trachea | 2,3         | MS3  |
| R.NNSIYVVANIGDK.K             | HexNAc(4)Hex(5)NeuAc(2)                       | N-glycan | 1204,506 | 3 | 0,7  | 130  | Uncharacterized protein                     | A0A1D5PJX9 | chicken | lung    | 2,6;2,6     | 1,16 |
| K.LVDGSGSPIANETVR.I           | HexNAc(4)Hex(5)NeuAc(1)                       | N-glycan | 1143,491 | 3 | 0,4  | 371  | Uncharacterized protein                     | A0A1D5PCD2 | chicken | colon   | 2,6         | MS3  |
| R.NTTVETPEK.G                 | HexNAc(4)Hex(5)NeuAc(1)                       | N-glycan | 978,066  | 3 | 0,5  | 893  | Uncharacterized protein                     | A0A1D5PCD2 | chicken | colon   | 2,6         | MS3  |
| K.VYGNETK.F                   | HexNAc(5)Hex(5)Fuc(1)NeuAc(1)                 | N-glycan | 1025,076 | 3 | -0,2 | 397  | Uncharacterized protein                     | A0A1D5PRW6 | chicken | colon   | 2,6         | MS3  |
| K.DYPNISLEELGQK.V             | HexNAc(5)Hex(5)Fuc(1)NeuAc(2)                 | N-glycan | 1015,925 | 4 | 4,3  | 1569 | Uncharacterized protein                     | A0A1D5PSC1 | chicken | colon   | 2,3;2,3     | MS3  |
| K.INNSSFVCVK.A                | HexNAc(1)Fuc(1),HexNAc(4)Hex(5)Fuc(1)NeuAc(2) | N-glycan | 1286,178 | 3 | 0,9  | 1550 | Uncharacterized protein                     | A0A1D5PSC1 | chicken | colon   | 2,3;2,6     | MS3  |
| R.AKDYPNISLEELGQK.V           | HexNAc(5)Hex(5)NeuAc(2)                       | N-glycan | 1029,194 | 4 | 4,6  | 1567 | Uncharacterized protein                     | A0A1D5PSC1 | chicken | colon   | 2,6;2,6     | MS3  |
| R.AKDYPNISLEELGQK.V           | HexNAc(5)Hex(6)Fuc(2)NeuAc(2)                 | N-glycan | 1142,485 | 4 | 3,4  | 1567 | Uncharacterized protein                     | A0A1D5PSC1 | chicken | colon   | 2,3;2,3     | MS3  |
| R.AKDYPNISLEELGQK.V           | HexNAc(6)Hex(6)Fuc(1)NeuAc(3)                 | N-glycan | 1229,766 | 4 | 4,6  | 1567 | Uncharacterized protein                     | A0A1D5PSC1 | chicken | colon   | 2,3;2,3;2,3 | MS3  |
| R.SDVNSGDYETIDKINSSFVCVK.A    | HexNAc(7)Hex(7)NeuAc(1)                       | N-glycan | 1357,304 | 4 | 2,8  | 1537 | Uncharacterized protein                     | A0A1D5PSC1 | chicken | colon   | 2,3         | MS3  |
| R.SDVNSGDYETIDKINSSFVCVK.A    | HexNAc(5)Hex(5)NeuAc(2)                       | N-glycan | 1248,015 | 4 | 4,5  | 1537 | Uncharacterized protein                     | A0A1D5PSC1 | chicken | colon   | 2,6;2,6     | MS3  |
| R.SDVNSGDYETIDKINSSFVCVK.A    | HexNAc(5)Hex(5)Fuc(1)NeuAc(2)                 | N-glycan | 1284,529 | 4 | 4,6  | 1537 | Uncharacterized protein                     | A0A1D5PSC1 | chicken | colon   | 2,3;2,3     | MS3  |
| R.SDVNSGDYETIDKINSSFVCVK.A    | HexNAc(5)Hex(5)Fuc(2)NeuAc(2)                 | N-glycan | 1320,789 | 4 | 1,0  | 1537 | Uncharacterized protein                     | A0A1D5PSC1 | chicken | colon   | 2,3;2,6     | MS3  |
| K.NGSIYAFR.G                  | HexNAc(3)Hex(6)NeuAc(1)                       | N-glycan | 934,044  | 3 | -0,1 | 167  | Uncharacterized protein                     | A0A1L1RY57 | chicken | colon   | 2,6         | MS3  |
| M.GLIHNR.T                    | HexNAc(4)Hex(5)NeuAc(1)                       | N-glycan | 875,035  | 3 | 0,9  | 2    | Uncharacterized protein                     | A0A1L1S118 | chicken | colon   | 2,6         | MS3  |

|                            |                               |          |          |   |      |      |                         |            |         |         |             |      |
|----------------------------|-------------------------------|----------|----------|---|------|------|-------------------------|------------|---------|---------|-------------|------|
| M.GLIHNR.T                 | HexNAc(4)Hex(5)NeuAc(2)       | N-glycan | 972,066  | 3 | 0,2  | 2    | Uncharacterized protein | A0A1L1S118 | chicken | colon   | 2,6;2,6     | MS3  |
| K.LVDGSGSPIANETVR.I        | HexNAc(4)Hex(5)NeuAc(2)       | N-glycan | 1240,527 | 3 | 3,3  | 371  | Uncharacterized protein | A0A1D5PCD2 | chicken | trachea | 2,6;2,6     | 1,26 |
| R.VNISAWR.T                | HexNAc(4)Hex(5)Fuc(1)NeuAc(2) | N-glycan | 1066,105 | 3 | 2,6  | 1722 | Uncharacterized protein | A0A1D5P6F4 | chicken | lung    | 2,3;2,3     | 0,53 |
| K.LVDGSGSPIANETVR.I        | HexNAc(4)Hex(5)NeuAc(1)       | N-glycan | 1143,494 | 3 | 2,5  | 371  | Uncharacterized protein | A0A1D5PCD2 | chicken | lung    | 2,6         | MS3  |
| K.LVDGSGSPIANETVR.I        | HexNAc(4)Hex(5)NeuAc(2)       | N-glycan | 930,644  | 4 | 0,6  | 371  | Uncharacterized protein | A0A1D5PCD2 | chicken | lung    | 2,6;2,6     | MS3  |
| R.ISLQGGQEM(ox)NYTTNEEGR.A | HexNAc(3)Hex(6)NeuAc(1)       | N-glycan | 1305,861 | 3 | 2,1  | 386  | Uncharacterized protein | A0A1D5PCD2 | chicken | lung    | 2,6         | MS3  |
| R.NTTVETPEK.G              | HexNAc(4)Hex(5)NeuAc(1)       | N-glycan | 1466,598 | 2 | 2,4  | 893  | Uncharacterized protein | A0A1D5PCD2 | chicken | lung    | 2,6         | MS3  |
| R.NTTVETPEK.G              | HexNAc(4)Hex(5)NeuAc(2)       | N-glycan | 1075,099 | 3 | 1,7  | 893  | Uncharacterized protein | A0A1D5PCD2 | chicken | lung    | 2,6;2,6     | MS3  |
| R.NTTVETPEK.G              | HexNAc(5)Hex(6)NeuAc(1)       | N-glycan | 1099,777 | 3 | 0,4  | 893  | Uncharacterized protein | A0A1D5PCD2 | chicken | lung    | 2,6         | MS3  |
| K.TNSTCLSNEDTCLQM(ox)R.F   | HexNAc(4)Hex(5)Fuc(1)NeuAc(2) | N-glycan | 1425,530 | 3 | 1,9  | 39   | Uncharacterized protein | A0A1D5PFW6 | chicken | lung    | 2,6;2,6     | 0,88 |
| K.KPCNSSDPK.C              | HexNAc(4)Hex(5)NeuAc(2)       | N-glycan | 1076,078 | 3 | 0,9  | 143  | Uncharacterized protein | A0A1D5PJX9 | chicken | lung    | 2,6;2,6     | 1,27 |
| K.IGECHYLANGTER.V          | HexNAc(5)Hex(5)Fuc(1)NeuAc(1) | N-glycan | 1234,152 | 3 | 0,7  | 38   | Uncharacterized protein | A0A1D5PM07 | chicken | lung    | *           | MS3  |
| K.AANLSDIVPNTSESETK.V      | HexNAc(3)Hex(6)NeuAc(1)       | N-glycan | 1187,833 | 3 | -0,1 | 955  | Uncharacterized protein | A0A1D5PQ85 | chicken | lung    | 2,6         | MS3  |
| K.AANLSDIVPNTSESETK.V      | HexNAc(4)Hex(5)NeuAc(1)       | N-glycan | 1201,509 | 3 | 0,2  | 955  | Uncharacterized protein | A0A1D5PQ85 | chicken | lung    | 2,6         | MS3  |
| K.TLSTVPTNLTVR.I           | HexNAc(4)Hex(5)NeuAc(1)       | N-glycan | 1072,477 | 3 | -1,3 | 1273 | Uncharacterized protein | A0A1D5PU94 | chicken | lung    | 2,6         | MS3  |
| R.DPNVIPVPGNHTK.G          | HexNAc(5)Hex(4)Fuc(1)NeuAc(1) | N-glycan | 1163,504 | 3 | 0,6  | 171  | Uncharacterized protein | A0A1D5PUZ5 | chicken | lung    | 2,6         | MS3  |
| R.LNESHTCK.H               | HexNAc(4)Hex(5)Fuc(1)NeuAc(1) | N-glycan | 1013,055 | 3 | -1,0 | 214  | Uncharacterized protein | E1BUT3     | chicken | lung    | 2,3         | MS3  |
| R.LNESHTCK.H               | HexNAc(4)Hex(5)Fuc(1)NeuAc(2) | N-glycan | 1110,088 | 3 | 0,5  | 214  | Uncharacterized protein | E1BUT3     | chicken | lung    | 2,3;2,3     | MS3  |
| K.GNVSALFILPNEGK.L         | HexNAc(4)Hex(5)NeuAc(2)       | N-glycan | 1221,863 | 3 | 2,0  | 298  | Uncharacterized protein | E1C206     | chicken | lung    | 2,6;2,6     | 1,07 |
| K.NGSIYAFR.G               | HexNAc(3)Hex(5)NeuAc(1)       | N-glycan | 880,027  | 3 | 0,3  | 167  | Uncharacterized protein | E1C7A7     | chicken | lung    | 2,6         | MS3  |
| R.LVNQSLK.M                | HexNAc(4)Hex(5)NeuAc(1)       | N-glycan | 905,726  | 3 | 0,8  | 883  | Uncharacterized protein | E1C7P4     | chicken | lung    | 2,6         | MS3  |
| R.LVNQSLK.M                | HexNAc(4)Hex(5)NeuAc(2)       | N-glycan | 1002,757 | 3 | 0,4  | 883  | Uncharacterized protein | E1C7P4     | chicken | lung    | 2,6;2,6     | MS3  |
| R.LLQLLNSDQR.D             | HexNAc(4)Hex(5)NeuAc(2)       | N-glycan | 1135,488 | 3 | 0,8  | 125  | Uncharacterized protein | E1C7T1     | chicken | lung    | 2,6;2,6     | MS3  |
| K.NVTFDETSLYVK.A           | HexNAc(4)Hex(5)NeuAc(2)       | N-glycan | 1207,498 | 3 | 0,7  | 936  | Uncharacterized protein | F1NEQ4     | chicken | lung    | 2,6;2,6     | MS3  |
| K.NVTFDETSLYVK.A           | HexNAc(5)Hex(6)NeuAc(3)       | N-glycan | 1069,933 | 4 | 0,9  | 936  | Uncharacterized protein | F1NEQ4     | chicken | lung    | 2,3;2,6;2,6 | MS3  |
| K.NVTFDETSLYVK.A           | HexNAc(5)Hex(6)Fuc(2)NeuAc(2) | N-glycan | 1426,243 | 3 | -1,8 | 936  | Uncharacterized protein | F1NEQ4     | chicken | lung    | 2,3;2,6     | MS3  |
| R.NNSFHCR.S                | HexNAc(4)Hex(5)NeuAc(2)       | N-glycan | 1043,383 | 3 | 0,5  | 277  | Uncharacterized protein | F1NF64     | chicken | lung    | 2,6;2,6     | 0,93 |
| K.ASLVEEGTGLEM(ox)NNTK.T   | HexNAc(3)Hex(5)NeuAc(1)       | N-glycan | 1140,473 | 3 | 0,7  | 318  | Uncharacterized protein | F1NK40     | chicken | lung    | 2,6         | MS3  |
| K.ASLVEEGTGLEM(ox)NNTK.T   | HexNAc(4)Hex(5)NeuAc(1)       | N-glycan | 1208,166 | 3 | 0,2  | 318  | Uncharacterized protein | F1NK40     | chicken | lung    | 2,6         | MS3  |
| K.GKEEIAQLSVSIEGESLNTTR.K  | HexNAc(4)Hex(5)NeuAc(2)       | N-glycan | 1117,240 | 4 | 0,6  | 95   | Uncharacterized protein | F1NK40     | chicken | lung    | 2,6;2,6     | 1,02 |
| R.ADGAGNITLLER.K           | HexNAc(4)Hex(5)NeuAc(1)       | N-glycan | 1572,168 | 2 | 1,1  | 63   | Uncharacterized protein | F1NK40     | chicken | lung    | 2,6         | MS3  |
| R.ADGAGNITLLER.K           | HexNAc(4)Hex(5)NeuAc(2)       | N-glycan | 1145,479 | 3 | 0,7  | 63   | Uncharacterized protein | F1NK40     | chicken | lung    | 2,6;2,6     | MS3  |
| R.ADGAGNITLLER.K           | HexNAc(5)Hex(6)NeuAc(1)       | N-glycan | 1170,158 | 3 | 0,6  | 63   | Uncharacterized protein | F1NK40     | chicken | lung    | 2,6         | MS3  |
| R.KVEEPQLLLNVTFPAPAPSK.G   | HexNAc(4)Hex(5)NeuAc(1)       | N-glycan | 1023,731 | 4 | 1,6  | 75   | Uncharacterized protein | F1NK40     | chicken | lung    | 2,6         | MS3  |
| K.ACHEVNNTLNR.D            | HexNAc(4)Hex(5)NeuAc(2)       | N-glycan | 1174,459 | 3 | 1,8  | 25   | Uncharacterized protein | F1NPN5     | chicken | lung    | 2,6;2,6     | 1,00 |
| K.EGYLHNR.T                | HexNAc(4)Hex(5)NeuAc(2)       | N-glycan | 1031,740 | 3 | 0,3  | 48   | Uncharacterized protein | F1P2M6     | chicken | lung    | 2,6;2,6     | MS3  |
| K.NAEAPDGNYSCEVTELN.R.E    | HexNAc(4)Hex(5)NeuAc(2)       | N-glycan | 1411,547 | 3 | 2,5  | 103  | Uncharacterized protein | F7BCL1     | chicken | lung    | 2,3;2,3     | 0,6  |
| K.TGNWSTK.P                | HexNAc(4)Hex(5)NeuAc(2)       | N-glycan | 1000,057 | 3 | 0,0  | 275  | Uncharacterized protein | A0A1D5PNU2 | chicken | lung    | 2,6;2,6     | 0,93 |
| K.TLSTVPTNLTVR.I           | HexNAc(4)Hex(5)NeuAc(2)       | N-glycan | 1169,511 | 3 | 1,3  | 1273 | Uncharacterized protein | A0A1D5PU94 | chicken | lung    | 2,6;2,6     | 1,22 |
| M.GLIHNR.T                 | HexNAc(4)Hex(5)NeuAc(2)       | N-glycan | 972,068  | 3 | 1,8  | 2    | Uncharacterized protein | A0A1L1S118 | chicken | lung    | 2,6;2,6     | 0,58 |
| R.LHYNGSATAFILPAK.G        | HexNAc(4)Hex(5)NeuAc(2)       | N-glycan | 1307,581 | 3 | 2,0  | 267  | Uncharacterized protein | E1BS56     | chicken | lung    | 2,6;2,6     | 1,44 |
| K.GEIISSNFQNSTEAK.K        | HexNAc(4)Hex(5)NeuAc(2)       | N-glycan | 1277,190 | 3 | 0,6  | 192  | Uncharacterized protein | E1C206     | chicken | lung    | 2,6;2,6     | 1,11 |
| K.NGSIYAFR.G               | HexNAc(4)Hex(5)NeuAc(2)       | N-glycan | 1044,755 | 3 | 3,4  | 167  | Uncharacterized protein | E1C7A7     | chicken | lung    | 2,6;2,6     | 1,03 |
| R.CSQGSENAFR.M             | HexNAc(4)Hex(5)NeuAc(2)       | N-glycan | 1101,740 | 3 | 1,1  | 722  | Uncharacterized protein | E1C7P4     | chicken | lung    | 2,6;2,6     | 0,89 |
| R.VQCIINGTFK.Y             | HexNAc(4)Hex(5)NeuAc(2)       | N-glycan | 1087,431 | 3 | 1,2  | 1224 | Uncharacterized protein | E1C7P4     | chicken | lung    | 2,6;2,6     | 1,15 |
| K.NGTSVCSTTGK.N            | HexNAc(4)Hex(5)NeuAc(2)       | N-glycan | 1102,421 | 3 | 1,5  | 94   | Uncharacterized protein | F1NF64     | chicken | lung    | 2,6;2,6     | 1,19 |
| K.FNEESEQTHYFSLNVTR.G      | HexNAc(4)Hex(5)NeuAc(2)       | N-glycan | 1468,943 | 3 | 2,3  | 175  | Uncharacterized protein | F1NHT5     | chicken | lung    | 2,6;2,6     | 1,14 |

|                             |                               |          |          |   |      |      |                                                 |            |         |         |         |      |
|-----------------------------|-------------------------------|----------|----------|---|------|------|-------------------------------------------------|------------|---------|---------|---------|------|
| K.NCTVR.P                   | HexNAc(4)Hex(5)NeuAc(2)       | N-glycan | 948,356  | 3 | 2,4  | 102  | Uncharacterized protein                         | F1NHT5     | chicken | lung    | 2,6;2,6 | 0,9  |
| R.KVEEPQLLLNVTFPAPPSK.G     | HexNAc(4)Hex(5)NeuAc(2)       | N-glycan | 1096,504 | 4 | 1,1  | 75   | Uncharacterized protein                         | F1NK40     | chicken | lung    | 2,6;2,6 | 0,91 |
| K.LVDGSGSPIANETVR.I         | HexNAc(4)Hex(5)NeuAc(1)       | N-glycan | 1143,491 | 3 | 0,5  | 371  | Uncharacterized protein                         | A0A1D5PCD2 | chicken | ileum   | 2,6     | MS3  |
| K.LVDGSGSPIANETVR.I         | HexNAc(4)Hex(5)NeuAc(2)       | N-glycan | 1240,524 | 3 | 1,3  | 371  | Uncharacterized protein                         | A0A1D5PCD2 | chicken | ileum   | 2,6;2,6 | 1,18 |
| R.NTTVETPEK.G               | HexNAc(4)Hex(5)NeuAc(1)       | N-glycan | 978,065  | 3 | -0,3 | 893  | Uncharacterized protein                         | A0A1D5PCD2 | chicken | ileum   | 2,6     | MS3  |
| K.EVNITTDYDAPK.A            | HexNAc(5)Hex(5)Fuc(1)NeuAc(1) | N-glycan | 1210,162 | 3 | 0,7  | 267  | Uncharacterized protein                         | A0A1D5PRW6 | chicken | ileum   | 2,6     | MS3  |
| K.SIGNDNATLR.L              | HexNAc(3)Hex(6)NeuAc(1)       | N-glycan | 978,398  | 3 | -3,5 | 183  | Uncharacterized protein                         | A0A1D5PRW6 | chicken | ileum   | 2,6     | MS3  |
| K.VYGNETK.F                 | HexNAc(5)Hex(5)Fuc(1)NeuAc(1) | N-glycan | 1025,074 | 3 | -1,8 | 397  | Uncharacterized protein                         | A0A1D5PRW6 | chicken | ileum   | 2,6     | MS3  |
| K.AENISCR.A                 | HexNAc(5)Hex(5)Fuc(1)NeuAc(1) | N-glycan | 1034,396 | 3 | 1,4  | 1560 | Uncharacterized protein                         | A0A1D5PSC1 | chicken | ileum   | 2,3     | MS3  |
| K.AENISCR.A                 | HexNAc(6)Hex(6)Fuc(1)NeuAc(1) | N-glycan | 1156,105 | 3 | -0,1 | 1560 | Uncharacterized protein                         | A0A1D5PSC1 | chicken | ileum   | 2,3     | MS3  |
| K.VENVSCR.A                 | HexNAc(6)Hex(5)Fuc(1)NeuAc(2) | N-glycan | 1203,792 | 3 | 0,8  | 1846 | Uncharacterized protein                         | A0A1D5PSC1 | chicken | ileum   | 2,3;2,3 | MS3  |
| M.GLIHNR.T                  | HexNAc(4)Hex(5)NeuAc(1)       | N-glycan | 875,034  | 3 | 0,3  | 2    | Uncharacterized protein                         | A0A1L1S118 | chicken | ileum   | 2,6     | MS3  |
| M.GLIHNR.T                  | HexNAc(4)Hex(5)NeuAc(2)       | N-glycan | 972,066  | 3 | 0,5  | 2    | Uncharacterized protein                         | A0A1L1S118 | chicken | ileum   | 2,6;2,6 | MS3  |
| R.AQNQELNSTIK.D             | HexNAc(3)Hex(5)NeuAc(1)       | N-glycan | 986,086  | 3 | 1,0  | 276  | Uncharacterized protein                         | E1C703     | chicken | ileum   | 2,3     | MS3  |
| K.NGSIYAFR.G                | HexNAc(3)Hex(6)NeuAc(1)       | N-glycan | 934,045  | 3 | 0,5  | 167  | Uncharacterized protein                         | E1C7A7     | chicken | ileum   | 2,6     | MS3  |
| R.DENVNSTLHVHYR.M           | HexNAc(6)Hex(6)NeuAc(1)       | N-glycan | 1017,166 | 4 | -0,8 | 85   | Uncharacterized protein                         | F1N9E2     | chicken | ileum   | 2,6     | MS3  |
| R.DENVNSTLHVHYR.M           | HexNAc(6)Hex(6)NeuAc(2)       | N-glycan | 1089,941 | 4 | 0,3  | 85   | Uncharacterized protein                         | F1N9E2     | chicken | ileum   | 2,6;2,6 | MS3  |
| K.NCTVR.P                   | HexNAc(4)Hex(5)NeuAc(1)       | N-glycan | 851,323  | 3 | 1,4  | 102  | Uncharacterized protein                         | F1NHT5     | chicken | ileum   | 2,6     | MS3  |
| K.NCTVR.P                   | HexNAc(4)Hex(5)NeuAc(2)       | N-glycan | 948,358  | 3 | 4,3  | 102  | Uncharacterized protein                         | F1NHT5     | chicken | ileum   | 2,6;2,6 | 0,96 |
| R.ADGAGNITLLER.K            | HexNAc(4)Hex(5)NeuAc(1)       | N-glycan | 1048,447 | 3 | 0,5  | 63   | Uncharacterized protein                         | F1NK40     | chicken | ileum   | 2,6     | MS3  |
| K.GNESSLFK.C                | HexNAc(4)Hex(5)Fuc(1)NeuAc(2) | N-glycan | 1078,095 | 3 | 1,2  | 128  | Uncharacterized protein                         | A0A1D5P246 | chicken | trachea | 2,3;2,6 | 0,65 |
| K.GNESSLFK.C                | HexNAc(5)Hex(5)NeuAc(2)       | N-glycan | 1097,106 | 3 | 4,5  | 128  | Uncharacterized protein                         | A0A1D5P246 | chicken | trachea | 2,3;2,3 | MS3  |
| K.LVDGSGSPIANETVR.I         | HexNAc(4)Hex(5)NeuAc(1)       | N-glycan | 1143,491 | 3 | 0,3  | 371  | Uncharacterized protein                         | A0A1D5PCD2 | chicken | trachea | 2,6     | MS3  |
| R.NTTVETPEK.G               | HexNAc(4)Hex(5)NeuAc(1)       | N-glycan | 978,066  | 3 | 0,0  | 893  | Uncharacterized protein                         | A0A1D5PCD2 | chicken | trachea | 2,6     | MS3  |
| R.NTTVETPEK.G               | HexNAc(4)Hex(5)NeuAc(2)       | N-glycan | 1075,097 | 3 | -0,6 | 893  | Uncharacterized protein                         | A0A1D5PCD2 | chicken | trachea | 2,6;2,6 | 1,15 |
| K.AANLSDIVPNTSETK.V         | HexNAc(3)Hex(6)NeuAc(1)       | N-glycan | 1187,832 | 3 | -0,9 | 955  | Uncharacterized protein                         | A0A1D5PQ85 | chicken | trachea | 2,6     | MS3  |
| K.LNATQR.V                  | HexNAc(5)Hex(5)Fuc(1)NeuAc(2) | N-glycan | 1086,104 | 3 | -0,8 | 1013 | Uncharacterized protein                         | A0A1D5PWQ4 | chicken | trachea | 2,3     | MS3  |
| M.GLIHNR.T                  | HexNAc(4)Hex(5)NeuAc(2)       | N-glycan | 972,066  | 3 | 0,4  | 2    | Uncharacterized protein                         | A0A1L1S118 | chicken | trachea | 2,6;2,6 | MS3  |
| R.ADGAGNITLLER.K            | HexNAc(4)Hex(5)NeuAc(1)       | N-glycan | 1048,447 | 3 | 0,7  | 63   | Uncharacterized protein                         | F1NK40     | chicken | trachea | 2,6     | MS3  |
| R.ADGAGNITLLER.K            | HexNAc(4)Hex(5)NeuAc(2)       | N-glycan | 1145,479 | 3 | 0,8  | 63   | Uncharacterized protein                         | F1NK40     | chicken | trachea | 2,6;2,6 | MS3  |
| R.IVNITLPK.I                | HexNAc(4)Hex(5)Fuc(1)NeuAc(2) | N-glycan | 1083,476 | 3 | 1,6  | 255  | Uncharacterized protein                         | F1NPN6     | chicken | trachea | 2,3;2,3 | 0,59 |
| K.TLSTVPTNLTVR.I            | HexNAc(4)Hex(5)NeuAc(2)       | N-glycan | 1169,512 | 3 | 1,7  | 1273 | Uncharacterized protein                         | A0A1D5PU94 | chicken | ileum   | 2,6;2,6 | 1,44 |
| R.ADGAGNITLLER.K            | HexNAc(4)Hex(5)NeuAc(2)       | N-glycan | 1145,480 | 3 | 1,2  | 63   | Uncharacterized protein                         | F1NK40     | chicken | ileum   | 2,6;2,6 | 1,04 |
| R.NTTVETPEK.G               | HexNAc(4)Hex(5)NeuAc(2)       | N-glycan | 1075,098 | 3 | 0,6  | 863  | Uncharacterized protein (alpha 2 macroglobulin) | A0A1D5PVX4 | chicken | colon   | 2,6;2,6 | 1,03 |
| R.NTTVETPEK.G               | HexNAc(4)Hex(5)NeuAc(2)       | N-glycan | 1075,095 | 3 | -2,2 | 863  | Uncharacterized protein (alpha 2 macroglobulin) | A0A1D5PVX4 | chicken | ileum   | 2,6;2,6 | 1,06 |
| R.YNCSR.G                   | HexNAc(5)Hex(5)NeuAc(1)       | N-glycan | 935,675  | 3 | 0,4  | 120  | Uncharacterized protein (CD55)                  | A0A1D5PU53 | chicken | lung    | 2,6     | MS3  |
| K.LECVVAPASGK.P             | HexNAc(1)Hex(1)NeuAc(2)       | O-glycan | 689,631  | 3 | 0,7  | 103  | Adenosine deaminase domain containing 1         | A0A1L1RSV5 | chicken | lung    | 2,3;2,6 | 0,8  |
| K.DACPAAGEETGEGSAATAEPQLG.- | HexNAc(1)Hex(1)NeuAc(1)       | O-glycan | 945,379  | 3 | -0,8 | 181  | Alpha-1-acid glycoprotein                       | Q8JIG5     | chicken | lung    | 2,6     | 1,15 |
| K.DACPAAGEETGEGSAATAEPQLG.- | HexNAc(2)Hex(2)NeuAc(1)       | O-glycan | 1067,092 | 3 | 1,7  | 181  | Alpha-1-acid glycoprotein                       | Q8JIG5     | chicken | lung    | 2,6     | 0,81 |
| K.SRDEIQAEIQTEKNK.V         | HexNAc(2)Hex(1)NeuAc(2)       | O-glycan | 735,584  | 4 | 1,3  | 131  | alpha-1,2-Mannosidase                           | A0A1D5PZT0 | chicken | ileum   | 2,6;2,6 | 0,95 |
| K.SSDEHGTEPDAPGLR.L         | HexNAc(2)Hex(1)NeuAc(2)       | O-glycan | 906,705  | 3 | -0,5 | 89   | alpha-1,2-Mannosidase                           | A0A1D5PBZ7 | chicken | ileum   | 2,6;2,6 | 1,03 |
| K.SRDEIQAEIQTEKNK.V         | HexNAc(1)Hex(1)NeuAc(2)       | O-glycan | 684,814  | 4 | 0,9  | 131  | alpha-1,2-Mannosidase                           | A0A1D5PZT0 | chicken | ileum   | 2,3;2,6 | 1,02 |

|                                    |                         |          |          |   |      |      |                                               |            |         |         |             |      |
|------------------------------------|-------------------------|----------|----------|---|------|------|-----------------------------------------------|------------|---------|---------|-------------|------|
| K.SSDEHGTEPDAPGLR.L                | HexNAc(2)Hex(1)NeuAc(2) | O-glycan | 906,705  | 3 | 0,0  | 89   | alpha-1,2-Mannosidase                         | A0A1D5PBZ7 | chicken | colon   | 2,3;2,6     | 2,59 |
| K.SSDEHGTEPDAPGLR.L                | HexNAc(1)Hex(1)NeuAc(2) | O-glycan | 839,012  | 3 | 0,1  | 89   | alpha-1,2-Mannosidase                         | A0A1D5PBZ7 | chicken | ileum   | 2,3;2,6     | 0,74 |
| K.SVPSQEKRR.I                      | HexNAc(1)Hex(1)NeuAc(2) | O-glycan | 669,312  | 3 | 1,5  | 533  | Anion exchange protein                        | E1BWW9     | chicken | trachea | 2,3;2,6     | 1,07 |
| R.QRPEEQPTASLAELAAQK.T             | HexNAc(1)Hex(1)NeuAc(1) | O-glycan | 918,102  | 3 | 1,0  | 122  | Chromogranin A                                | F1NLZ2     | chicken | colon   | 2,6         | 0,97 |
| R.SVATARPATGK.R                    | HexNAc(1)Hex(1)NeuAc(2) | O-glycan | 669,312  | 3 | 0,9  | 134  | Cochlin                                       | COCH       | chicken | trachea | 2,3;2,6     | 0,95 |
| R.TLPLVPITTPAPK.S                  | HexNAc(2)Hex(2)NeuAc(2) | O-glycan | 887,433  | 3 | 1,8  | 1745 | Collagen alpha-1(XII) chain                   | COCA1      | chicken | ileum   | 2,3;2,3     | 0,7  |
| R.TLPLVPITTPAPK.S                  | HexNAc(2)Hex(2)NeuAc(3) | O-glycan | 984,466  | 3 | 3,1  | 1745 | Collagen alpha-1(XII) chain                   | COCA1      | chicken | ileum   | 2,3;2,6;2,6 | 3,05 |
| R.TLPLVPITTPAPK.S                  | HexNAc(2)Hex(2)NeuAc(1) | O-glycan | 790,402  | 3 | 2,7  | 1745 | Collagen alpha-1(XII) chain                   | COCA1      | chicken | trachea | 2,3         | 0,29 |
| R.TLPLVPITTPAPK.S                  | HexNAc(2)Hex(2)NeuAc(2) | O-glycan | 887,433  | 3 | 1,4  | 1745 | Collagen alpha-1(XII) chain                   | COCA1      | chicken | trachea | 2,3;2,3     | 0,47 |
| K.GLDAEPTVEPEPPHEK.K               | HexNAc(1)Hex(1)NeuAc(2) | O-glycan | 930,411  | 3 | 1,6  | 140  | Elastin microfibril interfacer 2              | A0A1D5P4I7 | chicken | lung    | 2,3;2,6     | 0,93 |
| R.HSIGSSTSSHVTGAGSSHLGTGGK.D       | HexNAc(1)Hex(1)NeuAc(1) | O-glycan | 717,077  | 4 | -0,5 | 386  | Fibrinogen alpha chain                        | FIBA       | chicken | lung    | 2,6         | 1,73 |
| R.QEAAPTLRPVAPPISGTGYQPRPPK.Q      | HexNAc(1)Hex(1)NeuAc(1) | O-glycan | 821,919  | 4 | 0,0  | 26   | Fibrinogen beta chain (Fragment)              | FIBB       | chicken | lung    | 2,6         | 1,76 |
| R.RPVPTTATPLRPGSR.R                | HexNAc(2)Hex(2)NeuAc(2) | O-glycan | 730,349  | 4 | 0,2  | 2156 | Fibronectin                                   | F1NJT3     | chicken | lung    | 2,3;2,3     | 0,47 |
| R.RPVPTTATPLRPGSR.R                | HexNAc(2)Hex(2)NeuAc(3) | O-glycan | 803,123  | 4 | 0,5  | 2156 | Fibronectin                                   | F1NJT3     | chicken | lung    | 2,3;2,3,2,6 | 0,35 |
| R.RPVPTTATPLRPGSR.R                | HexNAc(2)Hex(2)NeuAc(2) | O-glycan | 730,349  | 4 | 0,6  | 1030 | Fibronectin (Fragments)                       | FINC       | chicken | ileum   | 2,3;2,3     | 0,51 |
| R.RPVPTTATPLRPGSR.R                | HexNAc(2)Hex(2)NeuAc(2) | O-glycan | 730,349  | 4 | 0,4  | 1030 | Fibronectin (Fragments)                       | FINC       | chicken | trachea | 2,3;2,3     | 0,54 |
| R.RPVPTTATPLRPGSR.R                | HexNAc(2)Hex(2)NeuAc(2) | O-glycan | 730,349  | 4 | -0,4 | 1030 | Fibronectin (Fragments)                       | FINC       | chicken | colon   | 2,3;2,3     | 0,5  |
| K.GPSPVAPVHLVNEESTDK.T             | HexNAc(1)Hex(1)NeuAc(2) | O-glycan | 941,761  | 3 | 0,5  | 69   | GDT1 family protein                           | R4GIM6     | chicken | ileum   | 2,3;2,6     | 1,86 |
| K.GPSPVAPVHLVNEESTDK.T             | HexNAc(1)Hex(1)NeuAc(2) | O-glycan | 941,762  | 3 | 0,9  | 69   | GDT1 family protein                           | R4GIM6     | chicken | colon   | 2,3;2,6     | 1,1  |
| R.GLPTVK.P                         | HexNAc(1)Hex(1)NeuAc(2) | O-glycan | 781,362  | 2 | 4,5  | 189  | Glypican 6                                    | F1P027     | chicken | lung    | 2,3;2,6     | 0,34 |
| K.AVPTVK.R                         | HexNAc(1)Hex(1)NeuAc(2) | O-glycan | 781,362  | 2 | 4,5  | 221  | Golgi membrane protein 1                      | E1C3N9     | chicken | lung    | 2,3;2,6     | 0,34 |
| K.ETLPSSTAETALELVNPDVVR.T          | HexNAc(1)Hex(1)NeuAc(1) | O-glycan | 966,468  | 3 | 0,6  | 498  | Kininogen 1                                   | A0A1L1RNR4 | chicken | lung    | 2,6         | 1,02 |
| R.TETGTPEPVNSPDISSFNGLLDHTESPLPK.C | HexNAc(1)Hex(1)NeuAc(1) | O-glycan | 1312,944 | 3 | 1,4  | 519  | Kininogen 1                                   | A0A1L1RNR4 | chicken | lung    | 2,6         | 3,73 |
| K.ETLPSSTAETALELVNPDVVR.T          | HexNAc(1)Hex(1)NeuAc(2) | O-glycan | 1063,501 | 3 | 1,7  | 498  | Kininogen 1                                   | A0A1L1RNR4 | chicken | lung    | 2,3;2,6     | 0,82 |
| K.GTDVKEPEITQGSK.E                 | HexNAc(1)Hex(1)NeuAc(2) | O-glycan | 846,380  | 3 | 0,5  | 975  | Mannose receptor C type 2                     | F1NP60     | chicken | lung    | 2,3;2,6     | 1,56 |
| R.GVLPPPPSPVDAEQLR.K               | HexNAc(1)Hex(1)NeuAc(2) | O-glycan | 873,749  | 3 | 0,7  | 50   | Polypeptide N-acetylgalactosaminyltransferase | F1NMD3     | chicken | ileum   | 2,3;2,6     | 0,35 |
| R.VKPSTTGQPCSEK.G                  | HexNAc(1)Hex(1)NeuAc(1) | O-glycan | 731,649  | 3 | 0,9  | 198  | Prothrombin                                   | A0A1L1RV31 | chicken | lung    | 2,6         | 0,76 |
| K.M(ox)PAQTKSPEIDKEERPEVDSK.K      | HexNAc(1)Hex(1)NeuAc(1) | O-glycan | 804,619  | 4 | 1,1  | 97   | Syndecan                                      | Q8JIY0     | chicken | lung    | 2,6         | 1,13 |
| K.MPAQTKSPEIDKEERPEVDSK.K          | HexNAc(1)Hex(1)NeuAc(2) | O-glycan | 877,393  | 4 | 1,2  | 97   | Syndecan                                      | Q8JIY0     | chicken | lung    | 2,3;2,6     | 0,81 |
| R.GSLGGADMER.E                     | HexNAc(1)Hex(1)NeuAc(2) | O-glycan | 970,388  | 2 | -0,5 | 4    | Testis associated actin remodelling kinase 1  | R4GJB8     | chicken | lung    | 2,3;2,6     | 1,86 |
| K.AVPSVKPEVTEPK.C                  | HexNAc(1)Hex(1)NeuAc(2) | O-glycan | 776,704  | 3 | 0,7  | 678  | Uncharacterized protein                       | E1C6U2     | chicken | lung    | 2,3;2,6     | 0,72 |
| K.CLASPSVSDTTAVTDSTTHLEEK.A        | HexNAc(1)Hex(1)NeuAc(2) | O-glycan | 1129,148 | 3 | 0,4  | 212  | Uncharacterized protein                       | A0A1D5PU53 | chicken | lung    | 2,3;2,3     | 2,13 |
| K.DSDNRPATPVKPR.E                  | HexNAc(1)Hex(1)NeuAc(1) | O-glycan | 736,016  | 3 | -0,7 | 58   | Uncharacterized protein                       | E1BRC1     | chicken | lung    | 2,6         | 0,86 |
| K.DSDNRPATPVKPR.E                  | HexNAc(1)Hex(1)NeuAc(2) | O-glycan | 833,049  | 3 | 0,2  | 58   | Uncharacterized protein                       | E1BRC1     | chicken | lung    | 2,3;2,6     | 1,76 |
| K.DSDNRPATPVKPR.E                  | HexNAc(1)Hex(1)NeuAc(1) | O-glycan | 736,018  | 3 | 1,2  | 58   | Uncharacterized protein                       | E1BRC1     | chicken | lung    | 2,6         | 1,55 |
| K.DSDNRPATPVKPR.E                  | HexNAc(1)Hex(1)NeuAc(2) | O-glycan | 625,039  | 4 | 1,6  | 58   | Uncharacterized protein                       | E1BRC1     | chicken | lung    | 2,3;2,6     | 0,68 |
| K.EALNTILR.A                       | HexNAc(2)Hex(2)NeuAc(2) | O-glycan | 781,687  | 3 | 0,7  | 43   | Uncharacterized protein                       | A0A1L1RV71 | chicken | lung    | 2,3;2,3     | 0,6  |
| K.EALNTILR.A                       | HexNAc(1)Hex(1)NeuAc(1) | O-glycan | 843,913  | 2 | 0,6  | 43   | Uncharacterized protein                       | A0A1L1RV71 | chicken | lung    | 2,6         | 0,96 |
| K.KHPEPSPTAPEK.I                   | HexNAc(1)Hex(1)NeuAc(2) | O-glycan | 789,355  | 3 | 0,3  | 572  | Uncharacterized protein                       | F1NWN4     | chicken | lung    | 2,3;2,6     | 0,82 |
| K.YMSVTFGR.K                       | HexNAc(2)Hex(2)NeuAc(1) | O-glycan | 991,413  | 2 | -1,4 | 79   | Uncharacterized protein                       | E1C4E6     | chicken | lung    | 2,6         | 2,12 |



|                                         |                         |          |          |   |      |      |                               |            |         |         |                     |      |
|-----------------------------------------|-------------------------|----------|----------|---|------|------|-------------------------------|------------|---------|---------|---------------------|------|
| R.VISEATPTLAAGKDPEK.S                   | HexNAc(2)Hex(2)NeuAc(3) | O-glycan | 1110,830 | 3 | 0,8  | 728  | Uncharacterized protein       | A0A1D5PFK3 | chicken | lung    | 2,3;2,6;<br>2,6     | 1,57 |
| R.VISEATPTLAAGKDPEK.S                   | HexNAc(2)Hex(2)NeuAc(4) | O-glycan | 1207,863 | 3 | 1,7  | 728  | Uncharacterized protein       | A0A1D5PFK3 | chicken | lung    | 2,3;2,6;<br>2,3;2,6 | 1,23 |
| K.IPAPTESSCQGVGEGHCPTATSG<br>TCVVTGDR.S | HexNAc(1)Hex(1)NeuAc(2) | O-glycan | 1058,428 | 4 | 1,1  | 636  | Uncharacterized protein       | A0A1D5P6F4 | chicken | lung    | 2,3;2,6             | 2,5  |
| R.GPCLQSPTK.P                           | HexNAc(2)Hex(2)NeuAc(1) | O-glycan | 999,411  | 2 | -1,8 | 1196 | Uncharacterized protein       | E1BR07     | chicken | lung    | 2,6                 | 2,65 |
| R.GTEASATAATPK.I                        | HexNAc(2)Hex(2)NeuAc(1) | O-glycan | 1063,463 | 2 | 2,7  | 369  | Uncharacterized protein       | E1BS56     | chicken | lung    | 2,6                 | 0,77 |
| R.GTEASATAATPK.I                        | HexNAc(1)Hex(1)NeuAc(1) | O-glycan | 880,895  | 2 | 0,7  | 369  | Uncharacterized protein       | E1BS56     | chicken | lung    | 2,6                 | 0,84 |
| K.DSDNRPATPVKPR.E                       | HexNAc(1)Hex(1)NeuAc(2) | O-glycan | 833,048  | 3 | -0,5 | 58   | Uncharacterized protein       | E1BRC1     | chicken | trachea | 2,3;2,6             | 1,15 |
| K.KHPEPSPTATPEK.I                       | HexNAc(1)Hex(1)NeuAc(2) | O-glycan | 789,355  | 3 | -0,1 | 572  | Uncharacterized protein       | F1NWN4     | chicken | trachea | 2,3;2,6             | 0,73 |
| K.TGEEVETGTTEPSHTGHEDL.-                | HexNAc(1)Hex(1)NeuAc(2) | O-glycan | 1025,084 | 3 | -0,6 | 205  | Uncharacterized protein       | A0A1L1RLI6 | chicken | trachea | 2,3;2,6             | 1,27 |
| R.VIPSRESNR.E                           | HexNAc(2)Hex(2)NeuAc(2) | O-glycan | 790,682  | 3 | 0,2  | 390  | Uncharacterized protein       | A0A1D5PVD2 | chicken | trachea | 2,3;2,3             | 0,5  |
| K.QWEESWK.Q                             | HexNAc(1)Hex(1)NeuAc(2) | O-glycan | 647,262  | 3 | -0,1 | 678  | Unkempt family zinc<br>finger | F1P3C2     | chicken | lung    | 2,3;2,6             | 0,72 |

1103

1104

1105

1106
